# Supplementary material
Source: publisher figshare collection journal article supplement (https://acs.figshare.com/ndownloader/files/5694189)
Supplement: Supplementary file 1 [file 5694189]

# ic020339h.cif

data_1b(Zn(CF3)4TPP(EtOH)3)


_audit_creation_date                  '1998-01-16'

_audit_creation_method                'by teXsan v1.8'

_audit_update_record

;

?

;

#------------------------------------------------------------------------------

_publ_requested_journal               ' ENTER JOURNAL NAME HERE'

_publ_requested_category              ' CHOOSE FI FM FO CI CM CO or AD'

_publ_contact_author_name             ' ENTER CONTACT NAME HERE


_publ_contact_author_address

;

     ENTER ADDRESS

;

_publ_contact_letter

;

      ENTER TEXT OF LETTER

;


_publ_requested_coeditor_name          ?

_publ_contact_author_phone            ' ENTER PHONE NUMBER '

_publ_contact_author_fax              ' ENTER FAX NUMBER '

_publ_contact_author_email            ' ENTER EMAIL ADDRESS '

loop_

_publ_author_name

_publ_author_footnote

_publ_author_address

' FIRST AUTHORS NAME '

;

    FIRST AUTHORS FOOTNOTES

;

;

    FIRST AUTHORS ADDRESS

;


_publ_section_title

;

      ENTER SECTION TITLE

;


_publ_section_title_footnote          ' ENTER ANY FOOTNOTES TO TITLE '


_publ_section_abstract

;

      ENTER ABSTRACT

;


_publ_section_exptl_refinement

;

      ENTER EXPERIMENTAL SECTION

;


_publ_section_comment

;

      ENTER TEXT

;


_publ_section_references

;

      ENTER OTHER REFERENCES


Molecular Structure Corporation. (1992-1997). teXsan.

Single Crystal Structure Analysis Software. Version 1.7.

MSC, 3200 Research Forest Drive, The Woodlands, TX 77381, USA.


Beurskens, P.T., Admiraal, G., Beurskens, G., Bosman, W.P.,

Garcia-Granda, S., Gould, R.O., Smits, J.M.M. and

Smykalla, C. (1992). The DIRDIF program system, Technical

Report of the Crystallography Laboratory, University of

Nijmegen, The Netherlands.

;


_publ_section_acknowledgements

;

      ENTER ACKNOWLEDGEMENTS

;


_publ_section_table_legends

;

      ENTER TABLE LEGENDS

;


_publ_section_figure_captions

;

      ENTER FIGURE CAPTIONS

;

#------------------------------------------------------------------------------

loop_

_publ_manuscript_incl_extra_item

'_geom_extra_table_head_3'

'_geom_bond_atom_site_label_D'

'_geom_bond_atom_site_label_H'

'_geom_contact_atom_site_label_A'

'_geom_bond_distance_DH'

'_geom_contact_distance_HA'

'_geom_contact_distance_DA'

'_geom_angle_DHA'

'_geom_contact_site_symmetry_A'

#

#

#------------------------------------------------------------------------------

_computing_data_collection            'MSC/AFC Diffractometer Control'

_computing_cell_refinement            'MSC/AFC Diffractometer Control'

_computing_data_reduction             'teXsan (MSC, 1992-1997)'

_computing_structure_solution

;

'DIRDIF92 PATTY (Beurskens, 1992)

;

_computing_structure_refinement       'teXsan (MSC, 1992-1997)'

_computing_publication_material       'teXsan (MSC, 1992-1997)'

#------------------------------------------------------------------------------

_cell_length_a                         12.0428(11)

_cell_length_b                         13.275(2)

_cell_length_c                         16.909(2)

_cell_angle_alpha                      96.951(5)

_cell_angle_beta                       108.124(2)

_cell_angle_gamma                      107.354(2)

_cell_volume                           2383.2(5)

_cell_formula_units_Z                  2

_cell_measurement_temperature          180.2

_cell_measurement_reflns_used          15174

_cell_measurement_theta_min            2.0

_cell_measurement_theta_max            30.1

#------------------------------------------------------------------------------

_symmetry_cell_setting                 triclinic

_symmetry_space_group_name_H-M        'P -1       '

_symmetry_Int_Tables_number            2

_symmetry_space_group_name_Hall        ?

loop_

_symmetry_equiv_pos_as_xyz

    '   +x,   +y,   +z'

    '   -x,   -y,   -z'

#------------------------------------------------------------------------------


_publ_section_exptl_prep

;

      ENTER EXPERIMENTAL SECTION

;

_exptl_crystal_description            'prism'

_exptl_crystal_colour                 'purple'

_exptl_crystal_size_max                0.50

_exptl_crystal_size_mid                0.27

_exptl_crystal_size_min                0.15

_exptl_crystal_density_diffrn          1.517

_exptl_crystal_density_meas            'not measured'

_chemical_formula_weight               1088.31

_chemical_formula_analytical           ?

_chemical_formula_sum                  'C54 H42 F12 N4 O3 Zn '

_chemical_formula_moiety               '?'

_chemical_formula_structural           ?

_chemical_compound_source              ?

_exptl_crystal_F_000                   1112.00

_exptl_absorpt_coefficient_mu          0.613

_exptl_absorpt_correction_type         ?

_exptl_absorpt_correction_T_max        1.000

_exptl_absorpt_correction_T_min        0.767

_exptl_special_details

;

   ?

;

#------------------------------------------------------------------------------

_diffrn_special_details

;

   ?

;

_diffrn_ambient_temperature            180.2

_diffrn_radiation_wavelength           0.7107

_diffrn_radiation_type                 'Mo K\a'

_diffrn_radiation_source              'X-ray tube'

_diffrn_radiation_monochromator        graphite

_diffrn_radiation_detector            'CCD'

_diffrn_measurement_device_type       'Quantum CCD'

_diffrn_detector_area_resol_mean      ?

_diffrn_measurement_method            ?


_diffrn_standards_number              0

_diffrn_standards_interval_count      0

_diffrn_standards_decay_%             0.00

loop_

_diffrn_standard_refln_index_h

_diffrn_standard_refln_index_k

_diffrn_standard_refln_index_l


_diffrn_reflns_number                  21568

_reflns_number_total                   10728

_reflns_number_gt                      10728

_reflns_threshold_expression            I>0.00\s(I)

_diffrn_reflns_av_R_equivalents        0.04503

_diffrn_reflns_av_sigmaI/netI          0.070

_diffrn_reflns_theta_full             ?

_diffrn_measured_fraction_theta_max   ?

_diffrn_measured_fraction_theta_full  ?

_diffrn_reflns_limit_h_min             -14

_diffrn_reflns_limit_h_max             16

_diffrn_reflns_limit_k_min             -15

_diffrn_reflns_limit_k_max             16

_diffrn_reflns_limit_l_min             -22

_diffrn_reflns_limit_l_max             18

_diffrn_reflns_theta_min               1.65

_diffrn_reflns_theta_max               30.08

_diffrn_reflns_reduction_process      'Lp corrections applied'

_diffrn_orient_matrix_UB_11            0.00000

_diffrn_orient_matrix_UB_12            0.00000

_diffrn_orient_matrix_UB_13            0.00000

_diffrn_orient_matrix_UB_21            0.00000

_diffrn_orient_matrix_UB_22            0.00000

_diffrn_orient_matrix_UB_23            0.00000

_diffrn_orient_matrix_UB_31            0.00000

_diffrn_orient_matrix_UB_32            0.00000

_diffrn_orient_matrix_UB_33            0.00000

#------------------------------------------------------------------------------

loop_

_atom_type_symbol

_atom_type_oxidation_number

_atom_type_number_in_cell

_atom_type_scat_dispersion_real

_atom_type_scat_dispersion_imag

_atom_type_scat_source

    C  0   108 0.002 0.002

;International Tables for Crystallography

(1992, Vol. C, Tables 4.2.6.8 and 6.1.1.1)

;

    H  0    84 0.000 0.000

;International Tables for Crystallography

(1992, Vol. C, Table 6.1.1.2)

;

    F  0    24 0.014 0.010

;International Tables for Crystallography

(1992, Vol. C, Tables 4.2.6.8 and 6.1.1.1)

;

    N  0     8 0.004 0.003

;International Tables for Crystallography

(1992, Vol. C, Tables 4.2.6.8 and 6.1.1.1)

;

    O  0     6 0.008 0.006

;International Tables for Crystallography

(1992, Vol. C, Tables 4.2.6.8 and 6.1.1.1)

;

    Zn 0     2 0.222 1.431

;International Tables for Crystallography

(1992, Vol. C, Tables 4.2.6.8 and 6.1.1.1)

;

#------------------------------------------------------------------------------

loop_

_atom_site_label

_atom_site_fract_x

_atom_site_fract_y

_atom_site_fract_z

_atom_site_U_iso_or_equiv

_atom_site_occupancy

_atom_site_refinement_flags

_atom_site_adp_type

_atom_site_calc_flag

_atom_site_calc_attached_atom

Zn(1) 0.40652(4) 0.45182(3) 0.27515(2) 0.02666(12) 1.000 . Uani d ?

F(1) -0.0024(2) 0.6348(2) 0.17616(14) 0.0640(9) 1.000 . Uani d ?

F(2) 0.1343(2) 0.7873(2) 0.25687(13) 0.0603(8) 1.000 . Uani d ?

F(3) 0.0886(2) 0.7600(2) 0.12336(12) 0.0582(8) 1.000 . Uani d ?

F(4) 0.0857(2) 0.6128(2) 0.01207(12) 0.0534(8) 1.000 . Uani d ?

F(5) 0.2337(2) 0.7615(2) 0.02916(12) 0.0563(8) 1.000 . Uani d ?

F(6) 0.2514(2) 0.6072(2) -0.00580(11) 0.0481(7) 1.000 . Uani d ?

F(7) 0.5928(2) 0.1348(2) 0.19573(11) 0.0540(8) 1.000 . Uani d ?

F(8) 0.6770(2) 0.0913(2) 0.31178(13) 0.0542(8) 1.000 . Uani d ?

F(9) 0.4803(2) 0.0155(2) 0.23892(13) 0.0576(8) 1.000 . Uani d ?

F(10) 0.3258(3) 0.0129(2) 0.35462(14) 0.0669(9) 1.000 . Uani d ?

F(11) 0.4561(2) 0.1002(2) 0.48003(12) 0.0538(8) 1.000 . Uani d ?

F(12) 0.5179(2) 0.0247(2) 0.39364(15) 0.0725(10) 1.000 . Uani d ?

O(1) 0.2500(3) 0.3304(2) 0.17867(15) 0.0440(8) 1.000 . Uani d ?

O(2) 0.1471(4) 0.1289(3) 0.1850(2) 0.1079(15) 1.000 . Uani d ?

O(3) -0.0946(6) 0.0432(6) 0.1786(5) 0.222(4) 1.000 . Uani d ?

N(1) 0.3575(3) 0.5874(2) 0.24406(15) 0.0278(8) 1.000 . Uani d ?

N(2) 0.5318(3) 0.4892(2) 0.21806(15) 0.0273(8) 1.000 . Uani d ?

N(3) 0.4884(2) 0.3448(2) 0.33033(15) 0.0235(8) 1.000 . Uani d ?

N(4) 0.3399(2) 0.4618(2) 0.36900(14) 0.0258(8) 1.000 . Uani d ?

C(1) 0.2669(3) 0.6174(3) 0.2632(2) 0.0270(10) 1.000 . Uani d ?

C(2) 0.2081(3) 0.6642(3) 0.1953(2) 0.0305(11) 1.000 . Uani d ?

C(3) 0.2633(3) 0.6573(3) 0.1361(2) 0.0313(11) 1.000 . Uani d ?

C(4) 0.3642(3) 0.6183(3) 0.1702(2) 0.0267(10) 1.000 . Uani d ?

C(5) 0.4671(3) 0.6248(3) 0.1460(2) 0.0273(10) 1.000 . Uani d ?

C(6) 0.5511(3) 0.5719(3) 0.1758(2) 0.0270(10) 1.000 . Uani d ?

C(7) 0.6700(3) 0.5931(3) 0.1655(2) 0.0352(11) 1.000 . Uani d ?

C(8) 0.7205(3) 0.5242(3) 0.1999(2) 0.0365(12) 1.000 . Uani d ?

C(9) 0.6330(3) 0.4561(3) 0.2308(2) 0.0279(10) 1.000 . Uani d ?

C(10) 0.6454(3) 0.3656(3) 0.2631(2) 0.0285(10) 1.000 . Uani d ?

C(11) 0.5600(3) 0.3027(3) 0.2980(2) 0.0259(10) 1.000 . Uani d ?

C(12) 0.5460(3) 0.1964(3) 0.3140(2) 0.0281(10) 1.000 . Uani d ?

C(13) 0.4765(3) 0.1810(3) 0.3648(2) 0.0277(10) 1.000 . Uani d ?

C(14) 0.4393(3) 0.2754(3) 0.3749(2) 0.0248(9) 1.000 . Uani d ?

C(15) 0.3732(3) 0.3039(3) 0.4245(2) 0.0225(9) 1.000 . Uani d ?

C(16) 0.3394(3) 0.3954(3) 0.4261(2) 0.0255(10) 1.000 . Uani d ?

C(17) 0.2878(3) 0.4319(3) 0.4858(2) 0.0315(11) 1.000 . Uani d ?

C(18) 0.2550(3) 0.5155(3) 0.4642(2) 0.0351(11) 1.000 . Uani d ?

C(19) 0.2818(3) 0.5319(3) 0.3870(2) 0.0261(10) 1.000 . Uani d ?

C(20) 0.2427(3) 0.6006(3) 0.3387(2) 0.0276(10) 1.000 . Uani d ?

C(21) 0.1079(4) 0.7096(3) 0.1883(2) 0.0415(13) 1.000 . Uani d ?

C(22) 0.2101(4) 0.6614(3) 0.0437(2) 0.0413(13) 1.000 . Uani d ?

C(23) 0.5764(4) 0.1102(3) 0.2673(2) 0.0389(12) 1.000 . Uani d ?

C(24) 0.4430(4) 0.0796(3) 0.3977(2) 0.0400(13) 1.000 . Uani d ?

C(25) 0.4989(3) 0.7049(3) 0.0941(2) 0.0284(10) 1.000 . Uani d ?

C(26) 0.5115(3) 0.8111(3) 0.1200(2) 0.0349(11) 1.000 . Uani d ?

C(27) 0.5424(4) 0.8870(3) 0.0731(2) 0.0437(13) 1.000 . Uani d ?

C(28) 0.5577(4) 0.8543(3) -0.0023(2) 0.0424(13) 1.000 . Uani d ?

C(29) 0.5462(4) 0.7497(3) -0.0297(2) 0.0395(12) 1.000 . Uani d ?

C(30) 0.5171(3) 0.6737(3) 0.0178(2) 0.0341(11) 1.000 . Uani d ?

C(31) 0.7586(3) 0.3389(3) 0.2678(2) 0.0305(10) 1.000 . Uani d ?

C(32) 0.7922(4) 0.3252(3) 0.1960(2) 0.0427(13) 1.000 . Uani d ?

C(33) 0.9020(4) 0.3082(4) 0.2033(2) 0.0550(15) 1.000 . Uani d ?

C(34) 0.9799(4) 0.3025(4) 0.2804(3) 0.0539(15) 1.000 . Uani d ?

C(35) 0.9455(4) 0.3125(3) 0.3518(2) 0.0433(13) 1.000 . Uani d ?

C(36) 0.8361(3) 0.3308(3) 0.3448(2) 0.0334(11) 1.000 . Uani d ?

C(37) 0.3268(3) 0.2326(3) 0.4786(2) 0.0282(10) 1.000 . Uani d ?

C(38) 0.2116(3) 0.1517(3) 0.4429(2) 0.0361(11) 1.000 . Uani d ?

C(39) 0.1627(4) 0.0876(3) 0.4918(3) 0.0539(15) 1.000 . Uani d ?

C(40) 0.2295(5) 0.1089(4) 0.5784(3) 0.062(2) 1.000 . Uani d ?

C(41) 0.3432(5) 0.1917(4) 0.6161(2) 0.059(2) 1.000 . Uani d ?

C(42) 0.3923(4) 0.2548(3) 0.5662(2) 0.0440(12) 1.000 . Uani d ?

C(43) 0.1717(3) 0.6601(3) 0.3729(2) 0.0315(11) 1.000 . Uani d ?

C(44) 0.0479(4) 0.6083(3) 0.3607(2) 0.0427(13) 1.000 . Uani d ?

C(45) -0.0117(4) 0.6642(4) 0.3981(3) 0.058(2) 1.000 . Uani d ?

C(46) 0.0512(5) 0.7673(5) 0.4467(3) 0.066(2) 1.000 . Uani d ?

C(47) 0.1739(5) 0.8170(4) 0.4596(2) 0.063(2) 1.000 . Uani d ?

C(48) 0.2353(4) 0.7654(3) 0.4231(2) 0.0477(13) 1.000 . Uani d ?

C(49) 0.1611(3) 0.3458(3) 0.1053(2) 0.0401(12) 1.000 . Uani d ?

C(50) 0.2063(4) 0.3502(4) 0.0323(2) 0.0580(15) 1.000 . Uani d ?

C(51) 0.1920(10) 0.0529(7) 0.1521(5) 0.169(4) 1.000 . Uani d ?

C(52) 0.1820(14) 0.0259(12) 0.0790(8) 0.268(8) 1.000 . Uani d ?

C(53) -0.1280(8) -0.0194(10) 0.2344(6) 0.177(5) 1.000 . Uani d ?

C(54) -0.0855(10) -0.1019(7) 0.2312(7) 0.213(5) 1.000 . Uani d ?

H(1) 0.195(7) 0.276(7) 0.177(5) 0.21(3) 1.000 . Uiso d ?

H(2) 0.7070 0.6481 0.1382 0.042 1.000 . Uiso c ?

H(3) 0.8019 0.5206 0.2035 0.044 1.000 . Uiso c ?

H(4) 0.2784 0.4006 0.5339 0.038 1.000 . Uiso c ?

H(5) 0.2198 0.5576 0.4944 0.042 1.000 . Uiso c ?

H(6) 0.4984 0.8341 0.1726 0.042 1.000 . Uiso c ?

H(7) 0.5533 0.9629 0.0933 0.052 1.000 . Uiso c ?

H(8) 0.5771 0.9070 -0.0364 0.051 1.000 . Uiso c ?

H(9) 0.5583 0.7277 -0.0829 0.047 1.000 . Uiso c ?

H(10) 0.5093 0.5985 -0.0019 0.041 1.000 . Uiso c ?

H(11) 0.7373 0.3278 0.1403 0.051 1.000 . Uiso c ?

H(12) 0.9250 0.3000 0.1528 0.066 1.000 . Uiso c ?

H(13) 1.0585 0.2916 0.2852 0.065 1.000 . Uiso c ?

H(14) 0.9989 0.3066 0.4068 0.052 1.000 . Uiso c ?

H(15) 0.8130 0.3382 0.3953 0.040 1.000 . Uiso c ?

H(16) 0.1629 0.1388 0.3818 0.043 1.000 . Uiso c ?

H(17) 0.0818 0.0279 0.4651 0.065 1.000 . Uiso c ?

H(18) 0.1952 0.0645 0.6134 0.075 1.000 . Uiso c ?

H(19) 0.3898 0.2065 0.6777 0.071 1.000 . Uiso c ?

H(20) 0.4730 0.3147 0.5930 0.053 1.000 . Uiso c ?

H(21) 0.0025 0.5336 0.3265 0.051 1.000 . Uiso c ?

H(22) -0.1000 0.6286 0.3891 0.070 1.000 . Uiso c ?

H(23) 0.0083 0.8058 0.4725 0.079 1.000 . Uiso c ?

H(24) 0.2192 0.8910 0.4956 0.076 1.000 . Uiso c ?

H(25) 0.3235 0.8026 0.4324 0.057 1.000 . Uiso c ?

H(26) 0.0812 0.2853 0.0871 0.048 1.000 . Uiso c ?

H(27) 0.1491 0.4141 0.1215 0.048 1.000 . Uiso c ?

H(28) 0.2168 0.2815 0.0149 0.070 1.000 . Uiso c ?

H(29) 0.1451 0.3618 -0.0161 0.070 1.000 . Uiso c ?

H(30) 0.2867 0.4100 0.0502 0.070 1.000 . Uiso c ?

H(31) 0.0643 0.1088 0.1560 0.130 1.000 . Uiso c ?

H(32) 0.2822 0.0810 0.1849 0.203 1.000 . Uiso c ?

H(33) 0.1528 -0.0145 0.1667 0.203 1.000 . Uiso c ?

H(34) 0.0933 -0.0015 0.0419 0.322 1.000 . Uiso c ?

H(35) 0.2275 0.0884 0.0619 0.322 1.000 . Uiso c ?

H(36) 0.2166 -0.0316 0.0736 0.322 1.000 . Uiso c ?

H(37) -0.1266 0.0964 0.1781 0.267 1.000 . Uiso c ?

H(38) -0.0909 0.0257 0.2929 0.213 1.000 . Uiso c ?

H(39) -0.2193 -0.0483 0.2168 0.213 1.000 . Uiso c ?

H(40) -0.1026 -0.1427 0.2733 0.257 1.000 . Uiso c ?

H(41) -0.1276 -0.1501 0.1738 0.257 1.000 . Uiso c ?

H(42) 0.0049 -0.0730 0.2443 0.257 1.000 . Uiso c ?


loop_

_atom_site_aniso_label

_atom_site_aniso_U_11

_atom_site_aniso_U_22

_atom_site_aniso_U_33

_atom_site_aniso_U_12

_atom_site_aniso_U_13

_atom_site_aniso_U_23

   Zn(1)  0.0361(3)   0.0268(2)   0.0254(2)   0.0155(2)   0.0156(2)   0.0129(2)

   F(1)   0.0400(15)  0.088(2)    0.078(2)    0.0266(15)  0.0281(13)  0.0414(15)

   F(2)   0.090(2)    0.070(2)    0.0491(13)  0.062(2)    0.0283(14)  0.0210(12)

   F(3)   0.076(2)    0.087(2)    0.0524(13)  0.062(2)    0.0358(13)  0.0464(13)

   F(4)   0.0395(15)  0.080(2)    0.0386(12)  0.0219(14)  0.0074(11)  0.0246(12)

   F(5)   0.073(2)    0.067(2)    0.0491(13)  0.0390(14)  0.0249(13)  0.0416(12)

   F(6)   0.0579(15)  0.067(2)    0.0270(10)  0.0314(13)  0.0150(11)  0.0170(10)

   F(7)   0.105(2)    0.0460(15)  0.0390(11)  0.0425(14)  0.0449(13)  0.0198(10)

   F(8)   0.077(2)    0.057(2)    0.0610(14)  0.0496(14)  0.0385(14)  0.0281(12)

   F(9)   0.077(2)    0.0292(14)  0.0729(15)  0.0187(14)  0.0379(15)  0.0077(12)

   F(10)  0.079(2)    0.0362(15)  0.074(2)    0.0003(15)  0.031(2)    0.0186(13)

   F(11)  0.083(2)    0.065(2)    0.0502(13)  0.0473(15)  0.0420(13)  0.0448(12)

   F(12)  0.127(2)    0.066(2)    0.099(2)    0.075(2)    0.084(2)    0.064(2)

   O(1)   0.045(2)    0.039(2)    0.0336(14)  0.0048(15)  0.0036(13)  0.0121(12)

   O(2)   0.113(3)    0.045(3)    0.129(3)    0.002(2)    0.018(3)    0.028(2)

   O(3)   0.203(7)    0.207(7)    0.317(8)    0.089(6)    0.121(6)    0.160(7)

   N(1)   0.042(2)    0.028(2)    0.0274(14)  0.0200(15)  0.0206(14)  0.0155(12)

   N(2)   0.040(2)    0.026(2)    0.0287(14)  0.0202(15)  0.0176(14)  0.0162(13)

   N(3)   0.029(2)    0.024(2)    0.0267(14)  0.0136(14)  0.0154(13)  0.0159(12)

   N(4)   0.036(2)    0.027(2)    0.0245(14)  0.0192(15)  0.0143(14)  0.0152(12)

   C(1)   0.031(2)    0.027(2)    0.029(2)    0.015(2)    0.012(2)    0.0121(15)

   C(2)   0.038(2)    0.036(2)    0.032(2)    0.023(2)    0.018(2)    0.021(2)

   C(3)   0.041(2)    0.036(2)    0.026(2)    0.020(2)    0.015(2)    0.018(2)

   C(4)   0.042(2)    0.021(2)    0.025(2)    0.015(2)    0.015(2)    0.0133(15)

   C(5)   0.034(2)    0.024(2)    0.027(2)    0.012(2)    0.012(2)    0.0134(15)

   C(6)   0.036(2)    0.028(2)    0.027(2)    0.015(2)    0.017(2)    0.0148(15)

   C(7)   0.037(2)    0.038(2)    0.043(2)    0.015(2)    0.025(2)    0.024(2)

   C(8)   0.031(2)    0.050(3)    0.046(2)    0.023(2)    0.023(2)    0.030(2)

   C(9)   0.035(2)    0.030(2)    0.024(2)    0.014(2)    0.013(2)    0.0135(15)

   C(10)  0.036(2)    0.030(2)    0.028(2)    0.017(2)    0.016(2)    0.0138(15)

   C(11)  0.031(2)    0.031(2)    0.023(2)    0.017(2)    0.012(2)    0.0133(15)

   C(12)  0.040(2)    0.023(2)    0.032(2)    0.019(2)    0.018(2)    0.0129(15)

   C(13)  0.036(2)    0.027(2)    0.027(2)    0.016(2)    0.012(2)    0.0174(15)

   C(14)  0.035(2)    0.022(2)    0.021(2)    0.011(2)    0.012(2)    0.0137(14)

   C(15)  0.027(2)    0.023(2)    0.022(2)    0.011(2)    0.0096(15)  0.0124(14)

   C(16)  0.028(2)    0.027(2)    0.022(2)    0.009(2)    0.011(2)    0.0098(15)

   C(17)  0.038(2)    0.038(2)    0.028(2)    0.019(2)    0.016(2)    0.013(2)

   C(18)  0.053(3)    0.036(2)    0.028(2)    0.023(2)    0.022(2)    0.011(2)

   C(19)  0.031(2)    0.023(2)    0.023(2)    0.009(2)    0.011(2)    0.0040(14)

   C(20)  0.035(2)    0.025(2)    0.029(2)    0.015(2)    0.016(2)    0.0108(15)

   C(21)  0.055(3)    0.052(3)    0.034(2)    0.033(2)    0.020(2)    0.022(2)

   C(22)  0.039(3)    0.051(3)    0.039(2)    0.021(2)    0.013(2)    0.022(2)

   C(23)  0.056(3)    0.033(3)    0.039(2)    0.022(2)    0.023(2)    0.016(2)

   C(24)  0.057(3)    0.033(3)    0.051(2)    0.027(2)    0.033(2)    0.021(2)

   C(25)  0.034(2)    0.031(2)    0.025(2)    0.016(2)    0.010(2)    0.0150(15)

   C(26)  0.055(3)    0.028(2)    0.034(2)    0.024(2)    0.020(2)    0.015(2)

   C(27)  0.070(3)    0.030(2)    0.044(2)    0.027(2)    0.025(2)    0.020(2)

   C(28)  0.064(3)    0.038(3)    0.039(2)    0.024(2)    0.024(2)    0.028(2)

   C(29)  0.055(3)    0.043(3)    0.035(2)    0.025(2)    0.025(2)    0.021(2)

   C(30)  0.054(3)    0.030(2)    0.031(2)    0.024(2)    0.023(2)    0.015(2)

   C(31)  0.038(2)    0.034(2)    0.031(2)    0.019(2)    0.019(2)    0.018(2)

   C(32)  0.055(3)    0.069(3)    0.030(2)    0.042(2)    0.025(2)    0.029(2)

   C(33)  0.067(3)    0.089(4)    0.052(3)    0.054(3)    0.044(3)    0.041(2)

   C(34)  0.056(3)    0.076(3)    0.068(3)    0.049(3)    0.041(3)    0.040(3)

   C(35)  0.049(3)    0.047(3)    0.046(2)    0.028(2)    0.017(2)    0.027(2)

   C(36)  0.036(2)    0.037(2)    0.035(2)    0.017(2)    0.017(2)    0.018(2)

   C(37)  0.035(2)    0.030(2)    0.032(2)    0.017(2)    0.019(2)    0.018(2)

   C(38)  0.038(2)    0.033(2)    0.043(2)    0.014(2)    0.018(2)    0.017(2)

   C(39)  0.056(3)    0.040(3)    0.090(3)    0.020(2)    0.050(3)    0.033(2)

   C(40)  0.102(4)    0.055(3)    0.076(3)    0.041(3)    0.072(3)    0.045(3)

   C(41)  0.101(4)    0.058(3)    0.038(2)    0.034(3)    0.038(3)    0.028(2)

   C(42)  0.064(3)    0.035(2)    0.031(2)    0.013(2)    0.015(2)    0.016(2)

   C(43)  0.047(3)    0.033(2)    0.027(2)    0.024(2)    0.018(2)    0.016(2)

   C(44)  0.048(3)    0.051(3)    0.050(2)    0.029(2)    0.029(2)    0.024(2)

   C(45)  0.074(3)    0.071(4)    0.064(3)    0.047(3)    0.043(3)    0.038(3)

   C(46)  0.114(5)    0.093(4)    0.048(3)    0.087(4)    0.050(3)    0.038(3)

   C(47)  0.099(4)    0.056(3)    0.045(3)    0.051(3)    0.019(3)    0.003(2)

   C(48)  0.064(3)    0.041(3)    0.042(2)    0.028(2)    0.015(2)    0.007(2)

   C(49)  0.034(2)    0.043(3)    0.039(2)    0.015(2)    0.007(2)    0.008(2)

   C(50)  0.072(3)    0.076(4)    0.037(2)    0.036(3)    0.022(2)    0.021(2)

   C(51)  0.243(11)   0.110(7)    0.119(6)    0.109(8)    -0.021(6)   0.017(6)

   C(52)  0.46(2)     0.32(2)     0.280(12)   0.28(2)     0.29(2)     0.229(14)

   C(53)  0.166(9)    0.228(12)   0.193(8)    0.070(8)    0.115(7)    0.114(8)

   C(54)  0.287(13)   0.110(7)    0.363(13)   0.146(9)    0.199(11)   0.074(8)

#------------------------------------------------------------------------------

_refine_special_details

;

   ?

;

_refine_ls_structure_factor_coef       Fsqd

_refine_ls_matrix_type                 full

_refine_ls_weighting_scheme            sigma

_refine_ls_weighting_details           'w = 1/[\s^2^(Fo)]'

_refine_ls_hydrogen_treatment          ?

_refine_ls_extinction_method           none

_refine_ls_extinction_coef             ?

_refine_ls_abs_structure_details       ?

_refine_ls_abs_structure_Flack         ?

_refine_ls_number_reflns               10728

_refine_ls_number_parameters           671

_refine_ls_number_restraints           0

_refine_ls_number_constraints          0

_refine_ls_R_factor_all                0.0993

_refine_ls_R_factor_gt                 ?

_refine_ls_wR_factor_all               0.0907

_refine_ls_wR_factor_ref               ?

_refine_ls_goodness_of_fit_all         1.841

_refine_ls_goodness_of_fit_ref         1.840

_refine_ls_shift/su_max                0.0230

_refine_ls_shift/su_mean               0.0010

_refine_diff_density_min               -0.79

_refine_diff_density_max               1.24

#------------------------------------------------------------------------------

_geom_special_details

;

   ?

;

loop_

_geom_bond_atom_site_label_1

_geom_bond_atom_site_label_2

_geom_bond_distance

_geom_bond_site_symmetry_1

_geom_bond_site_symmetry_2

_geom_bond_publ_flag

   Zn(1) O(1) 2.110(3) . . yes

   Zn(1) N(1) 2.130(2) . . yes

   Zn(1) N(2) 2.008(2) . . yes

   Zn(1) N(3) 2.108(2) . . yes

   Zn(1) N(4) 1.997(2) . . yes

   F(1) C(21) 1.337(4) . . yes

   F(2) C(21) 1.340(4) . . yes

   F(3) C(21) 1.349(3) . . yes

   F(4) C(22) 1.338(4) . . yes

   F(5) C(22) 1.342(4) . . yes

   F(6) C(22) 1.339(4) . . yes

   F(7) C(23) 1.348(3) . . yes

   F(8) C(23) 1.325(4) . . yes

   F(9) C(23) 1.338(4) . . yes

   F(10) C(24) 1.329(4) . . yes

   F(11) C(24) 1.335(4) . . yes

   F(12) C(24) 1.329(4) . . yes

   O(1) C(49) 1.447(4) . . yes

   O(1) H(1) 0.81(7) . . no

   O(2) C(51) 1.412(9) . . yes

   O(2) H(31) 0.90 . . no

   O(3) C(53) 1.403(7) . . yes

   O(3) H(37) 0.90 . . no

   N(1) C(1) 1.379(3) . . yes

   N(1) C(4) 1.378(3) . . yes

   N(2) C(6) 1.382(3) . . yes

   N(2) C(9) 1.380(4) . . yes

   N(3) C(11) 1.365(3) . . yes

   N(3) C(14) 1.374(3) . . yes

   N(4) C(16) 1.384(3) . . yes

   N(4) C(19) 1.378(4) . . yes

   C(1) C(2) 1.462(4) . . yes

   C(1) C(20) 1.424(3) . . yes

   C(2) C(3) 1.371(4) . . yes

   C(2) C(21) 1.482(4) . . yes

   C(3) C(4) 1.445(4) . . yes

   C(3) C(22) 1.509(4) . . yes

   C(4) C(5) 1.404(4) . . yes

   C(5) C(6) 1.401(4) . . yes

   C(5) C(25) 1.496(4) . . yes

   C(6) C(7) 1.445(4) . . yes

   C(7) C(8) 1.335(4) . . yes

   C(7) H(2) 0.98 . . no

   C(8) C(9) 1.445(4) . . yes

   C(8) H(3) 0.98 . . no

   C(9) C(10) 1.407(4) . . yes

   C(10) C(11) 1.445(4) . . yes

   C(10) C(31) 1.489(4) . . yes

   C(11) C(12) 1.439(4) . . yes

   C(12) C(13) 1.366(4) . . yes

   C(12) C(23) 1.509(4) . . yes

   C(13) C(14) 1.459(4) . . yes

   C(13) C(24) 1.510(4) . . yes

   C(14) C(15) 1.414(4) . . yes

   C(15) C(16) 1.392(4) . . yes

   C(15) C(37) 1.503(4) . . yes

   C(16) C(17) 1.446(4) . . yes

   C(17) C(18) 1.337(4) . . yes

   C(17) H(4) 0.98 . . no

   C(18) C(19) 1.464(4) . . yes

   C(18) H(5) 0.98 . . no

   C(19) C(20) 1.386(4) . . yes

   C(20) C(43) 1.513(4) . . yes

   C(25) C(26) 1.373(5) . . yes

   C(25) C(30) 1.409(4) . . yes

   C(26) C(27) 1.391(4) . . yes

   C(26) H(6) 0.98 . . no

   C(27) C(28) 1.381(4) . . yes

   C(27) H(7) 0.98 . . no

   C(28) C(29) 1.360(5) . . yes

   C(28) H(8) 0.98 . . no

   C(29) C(30) 1.395(4) . . yes

   C(29) H(9) 0.98 . . no

   C(30) H(10) 0.98 . . no

   C(31) C(32) 1.403(4) . . yes

   C(31) C(36) 1.384(4) . . yes

   C(32) C(33) 1.378(5) . . yes

   C(32) H(11) 0.98 . . no

   C(33) C(34) 1.375(5) . . yes

   C(33) H(12) 0.98 . . no

   C(34) C(35) 1.398(4) . . yes

   C(34) H(13) 0.98 . . no

   C(35) C(36) 1.381(4) . . yes

   C(35) H(14) 0.98 . . no

   C(36) H(15) 0.98 . . no

   C(37) C(38) 1.369(5) . . yes

   C(37) C(42) 1.390(4) . . yes

   C(38) C(39) 1.389(4) . . yes

   C(38) H(16) 0.98 . . no

   C(39) C(40) 1.379(6) . . yes

   C(39) H(17) 0.98 . . no

   C(40) C(41) 1.371(6) . . yes

   C(40) H(18) 0.98 . . no

   C(41) C(42) 1.396(5) . . yes

   C(41) H(19) 0.98 . . no

   C(42) H(20) 0.98 . . no

   C(43) C(44) 1.379(5) . . yes

   C(43) C(48) 1.390(5) . . yes

   C(44) C(45) 1.396(5) . . yes

   C(44) H(21) 0.98 . . no

   C(45) C(46) 1.359(7) . . yes

   C(45) H(22) 0.98 . . no

   C(46) C(47) 1.359(6) . . yes

   C(46) H(23) 0.98 . . no

   C(47) C(48) 1.372(5) . . yes

   C(47) H(24) 0.98 . . no

   C(48) H(25) 0.98 . . no

   C(49) C(50) 1.497(4) . . yes

   C(49) H(26) 0.98 . . no

   C(49) H(27) 0.98 . . no

   C(50) H(28) 0.98 . . no

   C(50) H(29) 0.98 . . no

   C(50) H(30) 0.98 . . no

   C(51) C(52) 1.202(10) . . yes

   C(51) H(32) 0.98 . . no

   C(51) H(33) 0.98 . . no

   C(52) H(34) 0.98 . . no

   C(52) H(35) 0.98 . . no

   C(52) H(36) 0.98 . . no

   C(53) C(54) 1.342(11) . . yes

   C(53) H(38) 0.98 . . no

   C(53) H(39) 0.98 . . no

   C(54) H(40) 0.98 . . no

   C(54) H(41) 0.98 . . no

   C(54) H(42) 0.98 . . no

#------------------------------------------------------------------------------

loop_

_geom_angle_atom_site_label_1

_geom_angle_atom_site_label_2

_geom_angle_atom_site_label_3

_geom_angle

_geom_angle_site_symmetry_1

_geom_angle_site_symmetry_2

_geom_angle_site_symmetry_3

_geom_angle_publ_flag

   O(1) Zn(1)  N(1) 97.13(10) . . . yes

   O(1) Zn(1)  N(2) 103.05(10) . . . yes

   O(1) Zn(1)  N(3) 96.01(10) . . . yes

   O(1) Zn(1)  N(4) 100.14(10) . . . yes

   N(1) Zn(1)  N(2) 88.68(9) . . . yes

   N(1) Zn(1)  N(3) 166.77(11) . . . yes

   N(1) Zn(1)  N(4) 87.89(9) . . . yes

   N(2) Zn(1)  N(3) 89.85(9) . . . yes

   N(2) Zn(1)  N(4) 156.80(11) . . . yes

   N(3) Zn(1)  N(4) 88.29(9) . . . yes

   Zn(1) O(1)  C(49) 127.1(2) . . . yes

   Zn(1) O(1)  H(1) 136.1(50) . . . no

   C(49) O(1)  H(1) 88.1(51) . . . no

   C(51) O(2)  H(31) 109.4 . . . no

   C(53) O(3)  H(37) 109.4 . . . no

   Zn(1) N(1)  C(1) 125.0(2) . . . yes

   Zn(1) N(1)  C(4) 119.8(2) . . . yes

   C(1) N(1)  C(4) 108.2(2) . . . yes

   Zn(1) N(2)  C(6) 126.0(2) . . . yes

   Zn(1) N(2)  C(9) 126.1(2) . . . yes

   C(6) N(2)  C(9) 106.3(2) . . . yes

   Zn(1) N(3)  C(11) 122.6(2) . . . yes

   Zn(1) N(3)  C(14) 124.1(2) . . . yes

   C(11) N(3)  C(14) 108.1(2) . . . yes

   Zn(1) N(4)  C(16) 125.5(2) . . . yes

   Zn(1) N(4)  C(19) 127.0(2) . . . yes

   C(16) N(4)  C(19) 107.4(2) . . . yes

   N(1) C(1)  C(2) 108.7(2) . . . yes

   N(1) C(1)  C(20) 121.2(3) . . . yes

   C(2) C(1)  C(20) 130.1(3) . . . yes

   C(1) C(2)  C(3) 106.2(3) . . . yes

   C(1) C(2)  C(21) 128.6(3) . . . yes

   C(3) C(2)  C(21) 125.2(3) . . . yes

   C(2) C(3)  C(4) 108.1(2) . . . yes

   C(2) C(3)  C(22) 126.1(3) . . . yes

   C(4) C(3)  C(22) 124.2(3) . . . yes

   N(1) C(4)  C(3) 108.1(2) . . . yes

   N(1) C(4)  C(5) 121.8(3) . . . yes

   C(3) C(4)  C(5) 129.3(2) . . . yes

   C(4) C(5)  C(6) 124.5(3) . . . yes

   C(4) C(5)  C(25) 117.6(3) . . . yes

   C(6) C(5)  C(25) 117.4(3) . . . yes

   N(2) C(6)  C(5) 125.3(3) . . . yes

   N(2) C(6)  C(7) 109.1(3) . . . yes

   C(5) C(6)  C(7) 125.6(3) . . . yes

   C(6) C(7)  C(8) 107.7(3) . . . yes

   C(6) C(7)  H(2) 126.2 . . . no

   C(8) C(7)  H(2) 126.2 . . . no

   C(7) C(8)  C(9) 107.5(3) . . . yes

   C(7) C(8)  H(3) 126.2 . . . no

   C(9) C(8)  H(3) 126.2 . . . no

   N(2) C(9)  C(8) 109.3(3) . . . yes

   N(2) C(9)  C(10) 125.5(3) . . . yes

   C(8) C(9)  C(10) 125.1(3) . . . yes

   C(9) C(10)  C(11) 123.7(3) . . . yes

   C(9) C(10)  C(31) 117.8(3) . . . yes

   C(11) C(10)  C(31) 118.3(3) . . . yes

   N(3) C(11)  C(10) 122.1(3) . . . yes

   N(3) C(11)  C(12) 109.4(2) . . . yes

   C(10) C(11)  C(12) 128.1(3) . . . yes

   C(11) C(12)  C(13) 106.8(3) . . . yes

   C(11) C(12)  C(23) 125.7(2) . . . yes

   C(13) C(12)  C(23) 126.2(3) . . . yes

   C(12) C(13)  C(14) 107.2(3) . . . yes

   C(12) C(13)  C(24) 123.4(3) . . . yes

   C(14) C(13)  C(24) 129.3(3) . . . yes

   N(3) C(14)  C(13) 108.1(2) . . . yes

   N(3) C(14)  C(15) 121.0(3) . . . yes

   C(13) C(14)  C(15) 130.7(3) . . . yes

   C(14) C(15)  C(16) 125.0(2) . . . yes

   C(14) C(15)  C(37) 121.8(3) . . . yes

   C(16) C(15)  C(37) 113.2(2) . . . yes

   N(4) C(16)  C(15) 127.2(2) . . . yes

   N(4) C(16)  C(17) 108.3(3) . . . yes

   C(15) C(16)  C(17) 124.3(3) . . . yes

   C(16) C(17)  C(18) 108.6(2) . . . yes

   C(16) C(17)  H(4) 125.7 . . . no

   C(18) C(17)  H(4) 125.7 . . . no

   C(17) C(18)  C(19) 106.9(3) . . . yes

   C(17) C(18)  H(5) 126.5 . . . no

   C(19) C(18)  H(5) 126.5 . . . no

   N(4) C(19)  C(18) 108.5(3) . . . yes

   N(4) C(19)  C(20) 128.0(2) . . . yes

   C(18) C(19)  C(20) 123.2(3) . . . yes

   C(1) C(20)  C(19) 124.3(3) . . . yes

   C(1) C(20)  C(43) 121.0(3) . . . yes

   C(19) C(20)  C(43) 114.7(2) . . . yes

   F(1) C(21)  F(2) 106.8(3) . . . yes

   F(1) C(21)  F(3) 106.7(3) . . . yes

   F(1) C(21)  C(2) 113.4(3) . . . yes

   F(2) C(21)  F(3) 103.2(3) . . . yes

   F(2) C(21)  C(2) 113.5(3) . . . yes

   F(3) C(21)  C(2) 112.5(3) . . . yes

   F(4) C(22)  F(5) 106.3(3) . . . yes

   F(4) C(22)  F(6) 105.5(3) . . . yes

   F(4) C(22)  C(3) 110.5(3) . . . yes

   F(5) C(22)  F(6) 106.9(3) . . . yes

   F(5) C(22)  C(3) 115.3(3) . . . yes

   F(6) C(22)  C(3) 111.7(3) . . . yes

   F(7) C(23)  F(8) 106.7(3) . . . yes

   F(7) C(23)  F(9) 104.2(3) . . . yes

   F(7) C(23)  C(12) 111.2(3) . . . yes

   F(8) C(23)  F(9) 107.3(3) . . . yes

   F(8) C(23)  C(12) 115.8(3) . . . yes

   F(9) C(23)  C(12) 110.9(3) . . . yes

   F(10) C(24)  F(11) 106.4(3) . . . yes

   F(10) C(24)  F(12) 107.9(3) . . . yes

   F(10) C(24)  C(13) 112.8(3) . . . yes

   F(11) C(24)  F(12) 104.8(3) . . . yes

   F(11) C(24)  C(13) 113.2(3) . . . yes

   F(12) C(24)  C(13) 111.2(3) . . . yes

   C(5) C(25)  C(26) 120.7(3) . . . yes

   C(5) C(25)  C(30) 121.1(3) . . . yes

   C(26) C(25)  C(30) 118.2(3) . . . yes

   C(25) C(26)  C(27) 121.5(3) . . . yes

   C(25) C(26)  H(6) 119.3 . . . no

   C(27) C(26)  H(6) 119.3 . . . no

   C(26) C(27)  C(28) 119.4(3) . . . yes

   C(26) C(27)  H(7) 120.3 . . . no

   C(28) C(27)  H(7) 120.3 . . . no

   C(27) C(28)  C(29) 120.7(3) . . . yes

   C(27) C(28)  H(8) 119.7 . . . no

   C(29) C(28)  H(8) 119.7 . . . no

   C(28) C(29)  C(30) 120.1(3) . . . yes

   C(28) C(29)  H(9) 119.9 . . . no

   C(30) C(29)  H(9) 119.9 . . . no

   C(25) C(30)  C(29) 120.1(3) . . . yes

   C(25) C(30)  H(10) 120.0 . . . no

   C(29) C(30)  H(10) 120.0 . . . no

   C(10) C(31)  C(32) 121.4(3) . . . yes

   C(10) C(31)  C(36) 120.3(3) . . . yes

   C(32) C(31)  C(36) 118.2(3) . . . yes

   C(31) C(32)  C(33) 120.4(3) . . . yes

   C(31) C(32)  H(11) 119.8 . . . no

   C(33) C(32)  H(11) 119.8 . . . no

   C(32) C(33)  C(34) 121.0(3) . . . yes

   C(32) C(33)  H(12) 119.5 . . . no

   C(34) C(33)  H(12) 119.5 . . . no

   C(33) C(34)  C(35) 119.1(3) . . . yes

   C(33) C(34)  H(13) 120.4 . . . no

   C(35) C(34)  H(13) 120.4 . . . no

   C(34) C(35)  C(36) 119.9(3) . . . yes

   C(34) C(35)  H(14) 120.0 . . . no

   C(36) C(35)  H(14) 120.0 . . . no

   C(31) C(36)  C(35) 121.3(3) . . . yes

   C(31) C(36)  H(15) 119.4 . . . no

   C(35) C(36)  H(15) 119.4 . . . no

   C(15) C(37)  C(38) 119.3(3) . . . yes

   C(15) C(37)  C(42) 121.0(3) . . . yes

   C(38) C(37)  C(42) 119.3(3) . . . yes

   C(37) C(38)  C(39) 121.0(3) . . . yes

   C(37) C(38)  H(16) 119.5 . . . no

   C(39) C(38)  H(16) 119.5 . . . no

   C(38) C(39)  C(40) 119.2(4) . . . yes

   C(38) C(39)  H(17) 120.4 . . . no

   C(40) C(39)  H(17) 120.4 . . . no

   C(39) C(40)  C(41) 120.7(3) . . . yes

   C(39) C(40)  H(18) 119.6 . . . no

   C(41) C(40)  H(18) 119.6 . . . no

   C(40) C(41)  C(42) 119.7(4) . . . yes

   C(40) C(41)  H(19) 120.2 . . . no

   C(42) C(41)  H(19) 120.2 . . . no

   C(37) C(42)  C(41) 120.0(4) . . . yes

   C(37) C(42)  H(20) 120.0 . . . no

   C(41) C(42)  H(20) 120.0 . . . no

   C(20) C(43)  C(44) 120.8(3) . . . yes

   C(20) C(43)  C(48) 119.2(3) . . . yes

   C(44) C(43)  C(48) 119.8(3) . . . yes

   C(43) C(44)  C(45) 118.9(4) . . . yes

   C(43) C(44)  H(21) 120.6 . . . no

   C(45) C(44)  H(21) 120.5 . . . no

   C(44) C(45)  C(46) 120.9(4) . . . yes

   C(44) C(45)  H(22) 119.6 . . . no

   C(46) C(45)  H(22) 119.6 . . . no

   C(45) C(46)  C(47) 119.8(4) . . . yes

   C(45) C(46)  H(23) 120.1 . . . no

   C(47) C(46)  H(23) 120.1 . . . no

   C(46) C(47)  C(48) 121.1(4) . . . yes

   C(46) C(47)  H(24) 119.5 . . . no

   C(48) C(47)  H(24) 119.5 . . . no

   C(43) C(48)  C(47) 119.5(4) . . . yes

   C(43) C(48)  H(25) 120.2 . . . no

   C(47) C(48)  H(25) 120.2 . . . no

   O(1) C(49)  C(50) 111.2(3) . . . yes

   O(1) C(49)  H(26) 109.1 . . . no

   O(1) C(49)  H(27) 109.0 . . . no

   C(50) C(49)  H(26) 109.0 . . . no

   C(50) C(49)  H(27) 109.0 . . . no

   H(26) C(49)  H(27) 109.5 . . . no

   C(49) C(50)  H(28) 109.5 . . . no

   C(49) C(50)  H(29) 109.5 . . . no

   C(49) C(50)  H(30) 109.5 . . . no

   H(28) C(50)  H(29) 109.5 . . . no

   H(28) C(50)  H(30) 109.5 . . . no

   H(29) C(50)  H(30) 109.5 . . . no

   O(2) C(51)  C(52) 126.8(8) . . . yes

   O(2) C(51)  H(32) 105.0 . . . no

   O(2) C(51)  H(33) 105.0 . . . no

   C(52) C(51)  H(32) 104.9 . . . no

   C(52) C(51)  H(33) 105.0 . . . no

   H(32) C(51)  H(33) 109.5 . . . no

   C(51) C(52)  H(34) 109.4 . . . no

   C(51) C(52)  H(35) 109.6 . . . no

   C(51) C(52)  H(36) 109.5 . . . no

   H(34) C(52)  H(35) 109.4 . . . no

   H(34) C(52)  H(36) 109.4 . . . no

   H(35) C(52)  H(36) 109.5 . . . no

   O(3) C(53)  C(54) 108.9(7) . . . yes

   O(3) C(53)  H(38) 109.7 . . . no

   O(3) C(53)  H(39) 109.6 . . . no

   C(54) C(53)  H(38) 109.6 . . . no

   C(54) C(53)  H(39) 109.5 . . . no

   H(38) C(53)  H(39) 109.5 . . . no

   C(53) C(54)  H(40) 109.5 . . . no

   C(53) C(54)  H(41) 109.5 . . . no

   C(53) C(54)  H(42) 109.4 . . . no

   H(40) C(54)  H(41) 109.5 . . . no

   H(40) C(54)  H(42) 109.4 . . . no

   H(41) C(54)  H(42) 109.5 . . . no

#------------------------------------------------------------------------------

loop_

_geom_contact_atom_site_label_1

_geom_contact_atom_site_label_2

_geom_contact_distance

_geom_contact_site_symmetry_1

_geom_contact_site_symmetry_2

_geom_contact_publ_flag

   F(1)      C(8)      3.392(4)   . 1_455 no

   F(2)      F(10)     3.054(4)   . 1_565 no

   F(2)      C(54)     3.335(8)   . 1_565 no

   F(3)      C(50)     3.440(5)   . 2_565 no

   F(4)      F(4)      2.981(5)   . 2_565 no

   F(4)      C(49)     3.261(4)   . 2_565 no

   F(4)      C(50)     3.556(4)   . 2_565 no

   F(6)      C(32)     3.370(3)   . 2_665 no

   F(7)      C(28)     3.253(4)   . 2_665 no

   F(7)      C(27)     3.445(4)   . 1_545 no

   F(7)      C(29)     3.561(4)   . 2_665 no

   F(8)      C(47)     3.589(5)   . 2_666 no

   F(8)      C(53)     3.591(9)   . 1_655 no

   F(9)      C(26)     3.362(4)   . 1_545 no

   F(9)      C(27)     3.499(4)   . 1_545 no

   F(9)      C(51)     3.535(9)   . . no

   F(10)     C(51)     3.482(7)   . . no

   F(10)     C(48)     3.590(4)   . 1_545 no

   F(11)     F(12)     2.858(2)   . 2_656 no

   F(11)     F(11)     3.214(4)   . 2_656 no

   F(11)     C(48)     3.350(5)   . 2_666 no

   F(11)     C(24)     3.580(4)   . 2_656 no

   F(12)     C(47)     3.564(6)   . 2_666 no

   O(1)      O(2)      2.623(4)   . . no

   O(1)      C(51)     3.482(9)   . . no

   O(2)      O(3)      2.753(7)   . . no

   O(2)      C(49)     3.306(5)   . . no

   O(3)      C(34)     3.374(9)   . 1_455 no

   O(3)      C(33)     3.506(8)   . 1_455 no

   O(3)      C(51)     3.583(13)  . . no

   N(1)      C(42)     3.514(5)   . 2_666 no

   F(1)      H(3)      2.6046     . 1_455 no

   F(1)      H(29)     2.7313     . 2_565 no

   F(2)      H(42)     2.7429     . 1_565 no

   F(3)      H(29)     2.6878     . 2_565 no

   F(3)      H(33)     2.7992     . 1_565 no

   F(4)      H(27)     2.9075     . 2_565 no

   F(4)      H(29)     2.9176     . 2_565 no

   F(4)      H(26)     2.9581     . 2_565 no

   F(5)      H(36)     2.8441     . 1_565 no

   F(5)      H(12)     2.9303     . 2_665 no

   F(6)      H(11)     2.5561     . 2_665 no

   F(7)      H(7)      2.5133     . 1_545 no

   F(7)      H(8)      2.6986     . 2_665 no

   F(9)      H(6)      2.6304     . 1_545 no

   F(9)      H(32)     2.7121     . . no

   F(9)      H(7)      2.9353     . 1_545 no

   F(11)     H(25)     2.4395     . 2_666 no

   F(12)     H(24)     2.9114     . 2_666 no

   O(2)      H(1)      1.90(8)    . . no

   O(2)      H(26)     2.9466     . . no

   O(3)      H(31)     2.0271     . . no

   N(1)      H(20)     2.7386     . 2_666 no

   N(4)      H(20)     2.9896     . 2_666 no

   C(19)     H(20)     2.9328     . 2_666 no

   C(27)     H(39)     2.9269     . 1_665 no

   C(28)     H(35)     2.9855     . 2_665 no

   C(29)     H(28)     2.9441     . 2_665 no

   C(33)     H(37)     2.6916     . 1_655 no

   C(34)     H(37)     2.7392     . 1_655 no

   C(34)     H(21)     2.9799     . 1_655 no

   C(35)     H(21)     2.9241     . 1_655 no

   C(36)     H(21)     2.9538     . 1_655 no

   C(39)     H(24)     2.8898     . 1_545 no

   C(39)     H(23)     2.9863     . 2_566 no

   C(46)     H(14)     2.9360     . 2_666 no

   C(51)     H(1)      2.93(8)    . . no

   H(1)      H(31)     2.2153     . . no

   H(3)      H(21)     2.5935     . 1_655 no

   H(5)      H(15)     2.3890     . 2_666 no

   H(8)      H(35)     2.5048     . 2_665 no

   H(9)      H(28)     2.6396     . 2_665 no

   H(10)     H(10)     2.5688     . 2_665 no

   H(12)     H(26)     2.5054     . 1_655 no

   H(17)     H(17)     2.5710     . 2_556 no

   H(18)     H(38)     2.5144     . 2_556 no

   H(31)     H(37)     2.4033     . . no

   H(33)     H(42)     2.5241     . . no

   H(34)     H(34)     2.2688     . 2 no

#------------------------------------------------------------------------------

loop_

_geom_torsion_atom_site_label_1

_geom_torsion_atom_site_label_2

_geom_torsion_atom_site_label_3

_geom_torsion_atom_site_label_4

_geom_torsion_site_symmetry_1

_geom_torsion_site_symmetry_2

_geom_torsion_site_symmetry_3

_geom_torsion_site_symmetry_4

_geom_torsion

_geom_torsion_publ_flag

   Zn(1) O(1) C(49) C(50) . . . . 85.7(3) no

   Zn(1) N(1) C(1) C(2) . . . . -146.8(2) no

   Zn(1) N(1) C(1) C(20) . . . . 32.9(4) no

   Zn(1) N(1) C(4) C(3) . . . . 144.8(2) no

   Zn(1) N(1) C(4) C(5) . . . . -44.7(4) no

   Zn(1) N(2) C(6) C(5) . . . . -17.7(5) no

   Zn(1) N(2) C(6) C(7) . . . . 163.6(2) no

   Zn(1) N(2) C(9) C(8) . . . . -162.7(2) no

   Zn(1) N(2) C(9) C(10) . . . . 21.5(5) no

   Zn(1) N(3) C(11) C(10) . . . . 37.7(4) no

   Zn(1) N(3) C(11) C(12) . . . . -148.8(2) no

   Zn(1) N(3) C(14) C(13) . . . . 151.1(2) no

   Zn(1) N(3) C(14) C(15) . . . . -32.9(4) no

   Zn(1) N(4) C(16) C(15) . . . . -6.7(5) no

   Zn(1) N(4) C(16) C(17) . . . . 177.8(2) no

   Zn(1) N(4) C(19) C(18) . . . . -176.7(2) no

   Zn(1) N(4) C(19) C(20) . . . . 8.9(5) no

   F(1) C(21) C(2) C(1) . . . . -67.8(5) no

   F(1) C(21) C(2) C(3) . . . . 111.3(4) no

   F(2) C(21) C(2) C(1) . . . . 54.3(5) no

   F(2) C(21) C(2) C(3) . . . . -126.6(4) no

   F(3) C(21) C(2) C(1) . . . . 171.1(3) no

   F(3) C(21) C(2) C(3) . . . . -9.8(6) no

   F(4) C(22) C(3) C(2) . . . . -35.3(5) no

   F(4) C(22) C(3) C(4) . . . . 128.4(4) no

   F(5) C(22) C(3) C(2) . . . . 85.3(4) no

   F(5) C(22) C(3) C(4) . . . . -111.1(4) no

   F(6) C(22) C(3) C(2) . . . . -152.4(3) no

   F(6) C(22) C(3) C(4) . . . . 11.2(5) no

   F(7) C(23) C(12) C(11) . . . . -13.5(5) no

   F(7) C(23) C(12) C(13) . . . . 151.4(3) no

   F(8) C(23) C(12) C(11) . . . . 108.4(4) no

   F(8) C(23) C(12) C(13) . . . . -86.7(4) no

   F(9) C(23) C(12) C(11) . . . . -129.0(3) no

   F(9) C(23) C(12) C(13) . . . . 35.9(5) no

   F(10) C(24) C(13) C(12) . . . . -102.6(4) no

   F(10) C(24) C(13) C(14) . . . . 73.8(4) no

   F(11) C(24) C(13) C(12) . . . . 136.5(3) no

   F(11) C(24) C(13) C(14) . . . . -47.1(5) no

   F(12) C(24) C(13) C(12) . . . . 18.8(5) no

   F(12) C(24) C(13) C(14) . . . . -164.8(3) no

   O(1) Zn(1) N(1) C(1) . . . . 76.0(3) no

   O(1) Zn(1) N(1) C(4) . . . . -70.9(3) no

   O(1) Zn(1) N(2) C(6) . . . . 93.7(3) no

   O(1) Zn(1) N(2) C(9) . . . . -103.0(3) no

   O(1) Zn(1) N(3) C(11) . . . . 82.2(3) no

   O(1) Zn(1) N(3) C(14) . . . . -69.2(2) no

   O(1) Zn(1) N(4) C(16) . . . . 84.3(3) no

   O(1) Zn(1) N(4) C(19) . . . . -92.9(3) no

   N(1) Zn(1) O(1) C(49) . . . . 13.2(3) no

   N(1) Zn(1) N(2) C(6) . . . . -3.3(3) no

   N(1) Zn(1) N(2) C(9) . . . . 160.0(3) no

   N(1) Zn(1) N(3) C(11) . . . . -104.6(4) no

   N(1) Zn(1) N(3) C(14) . . . . 104.0(4) no

   N(1) Zn(1) N(4) C(16) . . . . -178.9(3) no

   N(1) Zn(1) N(4) C(19) . . . . 3.9(3) no

   N(1) C(1) C(2) C(3) . . . . 1.9(4) no

   N(1) C(1) C(2) C(21) . . . . -178.8(4) no

   N(1) C(1) C(20) C(19) . . . . -16.4(5) no

   N(1) C(1) C(20) C(43) . . . . 162.7(3) no

   N(1) C(4) C(3) C(2) . . . . 8.5(4) no

   N(1) C(4) C(3) C(22) . . . . -157.6(3) no

   N(1) C(4) C(5) C(6) . . . . 20.4(5) no

   N(1) C(4) C(5) C(25) . . . . -151.2(3) no

   N(2) Zn(1) O(1) C(49) . . . . -77.1(3) no

   N(2) Zn(1) N(1) C(1) . . . . 179.0(3) no

   N(2) Zn(1) N(1) C(4) . . . . 32.0(3) no

   N(2) Zn(1) N(3) C(11) . . . . -21.0(3) no

   N(2) Zn(1) N(3) C(14) . . . . -172.4(3) no

   N(2) Zn(1) N(4) C(16) . . . . -97.2(3) no

   N(2) Zn(1) N(4) C(19) . . . . 85.6(4) no

   N(2) C(6) C(5) C(4) . . . . 14.3(5) no

   N(2) C(6) C(5) C(25) . . . . -174.1(3) no

   N(2) C(6) C(7) C(8) . . . . 0.6(4) no

   N(2) C(9) C(8) C(7) . . . . -3.0(4) no

   N(2) C(9) C(10) C(11) . . . . -8.5(5) no

   N(2) C(9) C(10) C(31) . . . . 176.6(3) no

   N(3) Zn(1) O(1) C(49) . . . . -168.3(2) no

   N(3) Zn(1) N(1) C(1) . . . . -97.2(5) no

   N(3) Zn(1) N(1) C(4) . . . . 115.8(4) no

   N(3) Zn(1) N(2) C(6) . . . . -170.2(3) no

   N(3) Zn(1) N(2) C(9) . . . . -6.8(3) no

   N(3) Zn(1) N(4) C(16) . . . . -11.6(3) no

   N(3) Zn(1) N(4) C(19) . . . . 171.3(3) no

   N(3) C(11) C(10) C(9) . . . . -23.6(5) no

   N(3) C(11) C(10) C(31) . . . . 151.3(3) no

   N(3) C(11) C(12) C(13) . . . . -6.8(4) no

   N(3) C(11) C(12) C(23) . . . . 160.5(3) no

   N(3) C(14) C(13) C(12) . . . . -0.4(4) no

   N(3) C(14) C(13) C(24) . . . . -177.3(3) no

   N(3) C(14) C(15) C(16) . . . . 7.4(5) no

   N(3) C(14) C(15) C(37) . . . . -175.6(3) no

   N(4) Zn(1) O(1) C(49) . . . . 102.3(2) no

   N(4) Zn(1) N(1) C(1) . . . . -23.9(3) no

   N(4) Zn(1) N(1) C(4) . . . . -170.9(3) no

   N(4) Zn(1) N(2) C(6) . . . . -84.8(3) no

   N(4) Zn(1) N(2) C(9) . . . . 78.5(4) no

   N(4) Zn(1) N(3) C(11) . . . . -177.8(3) no

   N(4) Zn(1) N(3) C(14) . . . . 30.8(2) no

   N(4) C(16) C(15) C(14) . . . . 14.3(5) no

   N(4) C(16) C(15) C(37) . . . . -162.9(3) no

   N(4) C(16) C(17) C(18) . . . . 1.6(4) no

   N(4) C(19) C(18) C(17) . . . . -4.8(4) no

   N(4) C(19) C(20) C(1) . . . . -5.9(6) no

   N(4) C(19) C(20) C(43) . . . . 174.9(3) no

   C(1) N(1) C(4) C(3) . . . . -7.2(4) no

   C(1) N(1) C(4) C(5) . . . . 163.4(3) no

   C(1) C(2) C(3) C(4) . . . . -6.2(4) no

   C(1) C(2) C(3) C(22) . . . . 159.6(3) no

   C(1) C(20) C(19) C(18) . . . . -179.6(3) no

   C(1) C(20) C(43) C(44) . . . . 102.9(4) no

   C(1) C(20) C(43) C(48) . . . . -82.4(4) no

   C(2) C(1) N(1) C(4) . . . . 3.4(4) no

   C(2) C(1) C(20) C(19) . . . . 163.1(4) no

   C(2) C(1) C(20) C(43) . . . . -17.8(6) no

   C(2) C(3) C(4) C(5) . . . . -161.1(3) no

   C(3) C(2) C(1) C(20) . . . . -177.7(4) no

   C(3) C(4) C(5) C(6) . . . . -171.2(4) no

   C(3) C(4) C(5) C(25) . . . . 17.2(5) no

   C(4) N(1) C(1) C(20) . . . . -177.0(3) no

   C(4) C(3) C(2) C(21) . . . . 174.5(4) no

   C(4) C(5) C(6) C(7) . . . . -167.3(3) no

   C(4) C(5) C(25) C(26) . . . . 50.6(5) no

   C(4) C(5) C(25) C(30) . . . . -129.6(3) no

   C(5) C(4) C(3) C(22) . . . . 32.8(6) no

   C(5) C(6) N(2) C(9) . . . . 176.2(3) no

   C(5) C(6) C(7) C(8) . . . . -178.0(3) no

   C(5) C(25) C(26) C(27) . . . . 179.3(3) no

   C(5) C(25) C(30) C(29) . . . . 179.7(3) no

   C(6) N(2) C(9) C(8) . . . . 3.3(4) no

   C(6) N(2) C(9) C(10) . . . . -172.5(3) no

   C(6) C(5) C(25) C(26) . . . . -121.6(4) no

   C(6) C(5) C(25) C(30) . . . . 58.2(4) no

   C(6) C(7) C(8) C(9) . . . . 1.4(4) no

   C(7) C(6) N(2) C(9) . . . . -2.4(4) no

   C(7) C(6) C(5) C(25) . . . . 4.3(5) no

   C(7) C(8) C(9) C(10) . . . . 172.9(3) no

   C(8) C(9) C(10) C(11) . . . . 176.4(3) no

   C(8) C(9) C(10) C(31) . . . . 1.5(5) no

   C(9) C(10) C(11) C(12) . . . . 164.2(3) no

   C(9) C(10) C(31) C(32) . . . . -53.3(5) no

   C(9) C(10) C(31) C(36) . . . . 124.3(3) no

   C(10) C(11) N(3) C(14) . . . . -166.9(3) no

   C(10) C(11) C(12) C(13) . . . . 166.2(3) no

   C(10) C(11) C(12) C(23) . . . . -26.6(6) no

   C(10) C(31) C(32) C(33) . . . . 175.3(4) no

   C(10) C(31) C(36) C(35) . . . . -176.1(3) no

   C(11) N(3) C(14) C(13) . . . . -3.8(3) no

   C(11) N(3) C(14) C(15) . . . . 172.2(3) no

   C(11) C(10) C(31) C(32) . . . . 131.5(3) no

   C(11) C(10) C(31) C(36) . . . . -51.0(5) no

   C(11) C(12) C(13) C(14) . . . . 4.2(4) no

   C(11) C(12) C(13) C(24) . . . . -178.7(3) no

   C(12) C(11) N(3) C(14) . . . . 6.5(4) no

   C(12) C(11) C(10) C(31) . . . . -20.8(5) no

   C(12) C(13) C(14) C(15) . . . . -175.9(3) no

   C(13) C(14) C(15) C(16) . . . . -177.5(3) no

   C(13) C(14) C(15) C(37) . . . . -0.5(5) no

   C(14) C(13) C(12) C(23) . . . . -163.0(3) no

   C(14) C(15) C(16) C(17) . . . . -170.8(3) no

   C(14) C(15) C(37) C(38) . . . . -87.7(4) no

   C(14) C(15) C(37) C(42) . . . . 99.5(4) no

   C(15) C(14) C(13) C(24) . . . . 7.2(6) no

   C(15) C(16) N(4) C(19) . . . . 170.9(3) no

   C(15) C(16) C(17) C(18) . . . . -174.1(3) no

   C(15) C(37) C(38) C(39) . . . . -176.7(3) no

   C(15) C(37) C(42) C(41) . . . . 175.7(3) no

   C(16) N(4) C(19) C(18) . . . . 5.7(4) no

   C(16) N(4) C(19) C(20) . . . . -168.7(3) no

   C(16) C(15) C(37) C(38) . . . . 89.6(4) no

   C(16) C(15) C(37) C(42) . . . . -83.2(4) no

   C(16) C(17) C(18) C(19) . . . . 1.9(4) no

   C(17) C(16) N(4) C(19) . . . . -4.6(4) no

   C(17) C(16) C(15) C(37) . . . . 11.9(5) no

   C(17) C(18) C(19) C(20) . . . . 169.9(3) no

   C(18) C(19) C(20) C(43) . . . . 1.3(5) no

   C(19) C(20) C(43) C(44) . . . . -77.9(4) no

   C(19) C(20) C(43) C(48) . . . . 96.8(4) no

   C(20) C(1) C(2) C(21) . . . . 1.6(6) no

   C(20) C(43) C(44) C(45) . . . . 175.9(3) no

   C(20) C(43) C(48) C(47) . . . . -175.2(3) no

   C(21) C(2) C(3) C(22) . . . . -19.7(6) no

   C(23) C(12) C(13) C(24) . . . . 14.1(5) no

   C(25) C(26) C(27) C(28) . . . . 1.7(6) no

   C(25) C(30) C(29) C(28) . . . . 0.4(6) no

   C(26) C(25) C(30) C(29) . . . . -0.5(5) no

   C(26) C(27) C(28) C(29) . . . . -1.8(6) no

   C(27) C(26) C(25) C(30) . . . . -0.6(5) no

   C(27) C(28) C(29) C(30) . . . . 0.8(6) no

   C(31) C(32) C(33) C(34) . . . . 1.0(7) no

   C(31) C(36) C(35) C(34) . . . . 0.4(6) no

   C(32) C(31) C(36) C(35) . . . . 1.6(5) no

   C(32) C(33) C(34) C(35) . . . . 1.0(7) no

   C(33) C(32) C(31) C(36) . . . . -2.3(6) no

   C(33) C(34) C(35) C(36) . . . . -1.7(6) no

   C(37) C(38) C(39) C(40) . . . . 2.6(5) no

   C(37) C(42) C(41) C(40) . . . . -0.9(6) no

   C(38) C(37) C(42) C(41) . . . . 2.9(5) no

   C(38) C(39) C(40) C(41) . . . . -0.5(6) no

   C(39) C(38) C(37) C(42) . . . . -3.8(5) no

   C(39) C(40) C(41) C(42) . . . . -0.3(6) no

   C(43) C(44) C(45) C(46) . . . . -1.0(5) no

   C(43) C(48) C(47) C(46) . . . . -0.8(6) no

   C(44) C(43) C(48) C(47) . . . . -0.4(5) no

   C(44) C(45) C(46) C(47) . . . . -0.2(6) no

   C(45) C(44) C(43) C(48) . . . . 1.3(5) no

   C(45) C(46) C(47) C(48) . . . . 1.1(6) no

#------------------------------------------------------------------------------

loop_

_geom_bond_atom_site_label_D

_geom_bond_atom_site_label_H

_geom_contact_atom_site_label_A

_geom_bond_distance_DH

_geom_contact_distance_HA

_geom_contact_distance_DA

_geom_angle_DHA

_geom_contact_site_symmetry_A

#===END

data_2b (Zn(TPPBr4)(MeOH)(DMF))

#------------------------------------------------------------------------------

_audit_creation_date                  '2001-05-31'

_audit_creation_method                'by teXsan v1.8'

_audit_update_record

;

?

;

#------------------------------------------------------------------------------

_publ_requested_journal               ' ENTER JOURNAL NAME HERE'

_publ_requested_category              ' CHOOSE FI FM FO CI CM CO or AD'

_publ_contact_author_name             ' ENTER CONTACT NAME HERE'


_publ_contact_author_address

;

     ENTER ADDRESS

;

_publ_contact_letter

;

      ENTER TEXT OF LETTER

;


_publ_requested_coeditor_name          ?

_publ_contact_author_phone            ' ENTER PHONE NUMBER '

_publ_contact_author_fax              ' ENTER FAX NUMBER '

_publ_contact_author_email            ' ENTER EMAIL ADDRESS '

loop_

_publ_author_name

_publ_author_footnote

_publ_author_address

' FIRST AUTHORS NAME '

;

    FIRST AUTHORS FOOTNOTES

;

;

    FIRST AUTHORS ADDRESS

;


_publ_section_title

;

      ENTER SECTION TITLE

;


_publ_section_title_footnote          ' ENTER ANY FOOTNOTES TO TITLE '


_publ_section_abstract

;

      ENTER ABSTRACT

;


_publ_section_exptl_refinement

;

      ENTER EXPERIMENTAL SECTION

;


_publ_section_comment

;

      ENTER TEXT

;


_publ_section_references

;

      ENTER OTHER REFERENCES


Molecular Structure Corporation. (1996-1998). d*TREK.

Area Detector Software. Version 4.4.

MSC, 3200 Research Forest Drive, The Woodlands, TX 77381, USA.


Molecular Structure Corporation. (1992-1997). teXsan.

Single Crystal Structure Analysis Software. Version 1.8.

MSC, 3200 Research Forest Drive, The Woodlands, TX 77381, USA.


Altomare, A., Burla, M.C., Cammalli, G., Cascarano, M.,

Giacovazzo, C., Guagliardi, A., Moliterni, A.G.G.,

Polidori, G., Spagna, A. (1998). SIR97: a new tool for crystal

structure determination and refinement.  Submitted.

;


_publ_section_acknowledgements

;

      ENTER ACKNOWLEDGEMENTS

;


_publ_section_table_legends

;

      ENTER TABLE LEGENDS

;


_publ_section_figure_captions

;

      ENTER FIGURE CAPTIONS

;

#------------------------------------------------------------------------------

loop_

_publ_manuscript_incl_extra_item

'_geom_extra_table_head_3'

'_geom_bond_atom_site_label_D'

'_geom_bond_atom_site_label_H'

'_geom_contact_atom_site_label_A'

'_geom_bond_distance_DH'

'_geom_contact_distance_HA'

'_geom_contact_distance_DA'

'_geom_angle_DHA'

'_geom_contact_site_symmetry_A'

#

#

#------------------------------------------------------------------------------

_computing_data_collection            'd*TREK (MSC, 1996-1998)'

_computing_cell_refinement            'd*TREK (MSC, 1996-1998)'

_computing_data_reduction             'd*TREK (MSC, 1996-1998)'

_computing_structure_solution

;

SIR97 (Altomare, et. al. 1998)

;

_computing_structure_refinement       'teXsan (MSC, 1992-1997)'

_computing_publication_material       'teXsan (MSC, 1992-1997)'

#------------------------------------------------------------------------------

_cell_length_a                         12.257(2)

_cell_length_b                         13.4377(8)

_cell_length_c                         14.387(1)

_cell_angle_alpha                      83.819(2)

_cell_angle_beta                       71.227(2)

_cell_angle_gamma                      73.575(3)

_cell_volume                           2151.7(3)

_cell_formula_units_Z                  2

_cell_measurement_temperature          173.2

_cell_measurement_reflns_used          11227

_cell_measurement_theta_min            2.99

_cell_measurement_theta_max            27.85

#------------------------------------------------------------------------------

_symmetry_cell_setting                 triclinic

_symmetry_space_group_name_H-M        'P -1       '

_symmetry_Int_Tables_number            2

_symmetry_space_group_name_Hall        ?

loop_

_symmetry_equiv_pos_as_xyz

    '   +x,   +y,   +z'

    '   -x,   -y,   -z'

#------------------------------------------------------------------------------


_publ_section_exptl_prep

;

      ENTER EXPERIMENTAL SECTION

;

_exptl_crystal_description            'chip'

_exptl_crystal_colour                 'purple'

_exptl_crystal_size_max                0.45

_exptl_crystal_size_mid                0.30

_exptl_crystal_size_min                0.25

_exptl_crystal_density_diffrn          1.696

_exptl_crystal_density_meas            'not measured'

_chemical_formula_weight               1098.83

_chemical_formula_analytical           ?

_chemical_formula_sum                  'C48 H35 Br4 N5 O2 Zn '

_chemical_formula_moiety               '?'

_chemical_formula_structural           ?

_chemical_compound_source              ?

_exptl_crystal_F_000                   1088.00

_exptl_absorpt_coefficient_mu          4.342

_exptl_absorpt_correction_type         multi-scan

_exptl_absorpt_correction_T_max        1.000

_exptl_absorpt_correction_T_min        0.5235

_exptl_special_details

;

Data were collected in 0.50\% oscillations with 12.0 s exposures.

A sweep of data was done using \f oscillations from 0.0 to 190.0\%

at \c = -90\%

and a second sweep was performed using \w oscillations between

-19.0 and 23.0\% at \c = -90.0\%.

The crystal-to-detector distance was 40.54 mm.

The detector swing angle was -5.5\%.

The absorption correction is based on a three-dimensional analysis

of symmetry-equivalent data and is performed along with batch scaling

in a single step. The resulting transmission factors, therefore,

include contributions from absorption, crystal decay, and

detectable variations in beam intensity.

;

#------------------------------------------------------------------------------

_diffrn_special_details

;

   ?

;

_diffrn_ambient_temperature            173.2

_diffrn_radiation_wavelength           0.7107

_diffrn_radiation_type                 'Mo K\a'

_diffrn_radiation_source              'X-ray tube'

_diffrn_radiation_monochromator        graphite

_diffrn_radiation_detector            'CCD'

_diffrn_measurement_device_type       'Rigaku/ADSC CCD'

_diffrn_detector_area_resol_mean      11.76

_diffrn_measurement_method            'area detector'

_diffrn_standards_number              0

_diffrn_standards_interval_count      0

_diffrn_standards_decay_%             0.00

loop_

_diffrn_standard_refln_index_h

_diffrn_standard_refln_index_k

_diffrn_standard_refln_index_l

   ? ? ?


_diffrn_reflns_number                  18455

_reflns_number_total                   8178

_reflns_number_gt                      6086

_reflns_threshold_expression            I>3.00\s(I)

_diffrn_reflns_av_R_equivalents        0.05031

_diffrn_reflns_av_sigmaI/netI          0.090

_diffrn_reflns_theta_full             ?

_diffrn_measured_fraction_theta_max   ?

_diffrn_measured_fraction_theta_full  ?

_diffrn_reflns_limit_h_min             -15

_diffrn_reflns_limit_h_max             15

_diffrn_reflns_limit_k_min             -17

_diffrn_reflns_limit_k_max             16

_diffrn_reflns_limit_l_min             -18

_diffrn_reflns_limit_l_max             16

_diffrn_reflns_theta_min               2.99

_diffrn_reflns_theta_max               27.85

_diffrn_reflns_reduction_process      'Lp corrections applied'

_diffrn_orient_matrix_UB_11            0.00000

_diffrn_orient_matrix_UB_12            0.00000

_diffrn_orient_matrix_UB_13            0.00000

_diffrn_orient_matrix_UB_21            0.00000

_diffrn_orient_matrix_UB_22            0.00000

_diffrn_orient_matrix_UB_23            0.00000

_diffrn_orient_matrix_UB_31            0.00000

_diffrn_orient_matrix_UB_32            0.00000

_diffrn_orient_matrix_UB_33            0.00000

#------------------------------------------------------------------------------

loop_

_atom_type_symbol

_atom_type_oxidation_number

_atom_type_number_in_cell

_atom_type_scat_dispersion_real

_atom_type_scat_dispersion_imag

_atom_type_scat_source

    C  0    96 0.002 0.002

;International Tables for Crystallography

(1992, Vol. C, Tables 4.2.6.8 and 6.1.1.1)

;

    H  0    70 0.000 0.000

;International Tables for Crystallography

(1992, Vol. C, Table 6.1.1.2)

;

    Br 0     8 -0.374 2.456

;International Tables for Crystallography

(1992, Vol. C, Tables 4.2.6.8 and 6.1.1.1)

;

    N  0    10 0.004 0.003

;International Tables for Crystallography

(1992, Vol. C, Tables 4.2.6.8 and 6.1.1.1)

;

    O  0     4 0.008 0.006

;International Tables for Crystallography

(1992, Vol. C, Tables 4.2.6.8 and 6.1.1.1)

;

    Zn 0     2 0.222 1.431

;International Tables for Crystallography

(1992, Vol. C, Tables 4.2.6.8 and 6.1.1.1)

;

#------------------------------------------------------------------------------

loop_

_atom_site_label

_atom_site_fract_x

_atom_site_fract_y

_atom_site_fract_z

_atom_site_U_iso_or_equiv

_atom_site_occupancy

_atom_site_refinement_flags

_atom_site_adp_type

_atom_site_calc_flag

_atom_site_calc_attached_atom

Br(1) 0.58180(4) -0.04914(3) 0.69092(3) 0.0238(1) 1.000 . Uani d ?

Br(2) 0.53182(4) -0.28795(3) 0.74241(3) 0.0283(1) 1.000 . Uani d ?

Br(3) 0.72294(5) -0.43406(3) -0.07081(3) 0.0401(1) 1.000 . Uani d ?

Br(4) 0.68507(4) -0.17764(3) -0.11018(3) 0.0298(1) 1.000 . Uani d ?

Zn(1) 0.74243(3) -0.26443(3) 0.29861(3) 0.01172(9) 1.000 . Uani d ?

O(1) 0.9292(2) -0.3092(2) 0.2706(2) 0.0233(7) 1.000 . Uani d ?

O(2) 0.9950(3) -0.4945(3) 0.3487(3) 0.054(1) 1.000 . Uani d ?

N(1) 0.6918(2) -0.2356(2) 0.4507(2) 0.0123(7) 1.000 . Uani d ?

N(2) 0.7148(2) -0.4077(2) 0.3328(2) 0.0126(7) 1.000 . Uani d ?

N(3) 0.7404(3) -0.2803(2) 0.1550(2) 0.0143(7) 1.000 . Uani d ?

N(4) 0.7244(3) -0.1109(2) 0.2710(2) 0.0133(7) 1.000 . Uani d ?

N(5) 1.0279(3) -0.6695(3) 0.3602(3) 0.040(1) 1.000 . Uani d ?

C(1) 0.6800(3) -0.1434(2) 0.4904(2) 0.0125(8) 1.000 . Uani d ?

C(2) 0.6312(3) -0.1512(2) 0.5963(2) 0.0140(8) 1.000 . Uani d ?

C(3) 0.6151(3) -0.2480(3) 0.6173(2) 0.0145(8) 1.000 . Uani d ?

C(4) 0.6568(3) -0.3030(2) 0.5260(2) 0.0106(8) 1.000 . Uani d ?

C(5) 0.6689(3) -0.4089(2) 0.5139(2) 0.0125(8) 1.000 . Uani d ?

C(6) 0.6999(3) -0.4559(2) 0.4234(2) 0.0121(8) 1.000 . Uani d ?

C(7) 0.7228(3) -0.5660(2) 0.4117(3) 0.0159(8) 1.000 . Uani d ?

C(8) 0.7493(3) -0.5831(2) 0.3158(3) 0.0171(9) 1.000 . Uani d ?

C(9) 0.7437(3) -0.4831(2) 0.2656(2) 0.0123(8) 1.000 . Uani d ?

C(10) 0.7598(3) -0.4684(2) 0.1650(3) 0.0162(8) 1.000 . Uani d ?

C(11) 0.7470(3) -0.3717(3) 0.1150(2) 0.0153(8) 1.000 . Uani d ?

C(12) 0.7347(3) -0.3479(3) 0.0177(3) 0.0204(9) 1.000 . Uani d ?

C(13) 0.7220(3) -0.2456(3) 0.0008(3) 0.0193(9) 1.000 . Uani d ?

C(14) 0.7313(3) -0.2030(3) 0.0852(2) 0.0142(8) 1.000 . Uani d ?

C(15) 0.7386(3) -0.1024(2) 0.0951(3) 0.0162(8) 1.000 . Uani d ?

C(16) 0.7412(3) -0.0631(2) 0.1808(3) 0.0158(8) 1.000 . Uani d ?

C(17) 0.7598(4) 0.0378(3) 0.1855(3) 0.023(1) 1.000 . Uani d ?

C(18) 0.7536(3) 0.0495(3) 0.2790(3) 0.0193(9) 1.000 . Uani d ?

C(19) 0.7291(3) -0.0423(2) 0.3331(3) 0.0151(8) 1.000 . Uani d ?

C(20) 0.7082(3) -0.0561(2) 0.4349(2) 0.0133(8) 1.000 . Uani d ?

C(21) 0.6585(3) -0.4795(2) 0.6026(2) 0.0119(8) 1.000 . Uani d ?

C(22) 0.7444(3) -0.4985(3) 0.6507(3) 0.0171(9) 1.000 . Uani d ?

C(23) 0.7353(4) -0.5599(3) 0.7349(3) 0.023(1) 1.000 . Uani d ?

C(24) 0.6404(4) -0.6046(3) 0.7719(3) 0.0222(9) 1.000 . Uani d ?

C(25) 0.5561(3) -0.5885(3) 0.7234(3) 0.0212(9) 1.000 . Uani d ?

C(26) 0.5650(3) -0.5263(3) 0.6385(3) 0.0158(8) 1.000 . Uani d ?

C(27) 0.7910(3) -0.5649(3) 0.1069(3) 0.0177(9) 1.000 . Uani d ?

C(28) 0.7039(4) -0.6128(3) 0.1091(3) 0.028(1) 1.000 . Uani d ?

C(29) 0.7328(4) -0.7001(3) 0.0536(3) 0.036(1) 1.000 . Uani d ?

C(30) 0.8487(5) -0.7402(3) -0.0030(3) 0.040(1) 1.000 . Uani d ?

C(31) 0.9364(4) -0.6944(3) -0.0061(3) 0.037(1) 1.000 . Uani d ?

C(32) 0.9075(4) -0.6062(3) 0.0505(3) 0.027(1) 1.000 . Uani d ?

C(33) 0.7473(4) -0.0301(3) 0.0077(3) 0.0208(9) 1.000 . Uani d ?

C(34) 0.8540(4) -0.0412(3) -0.0688(3) 0.030(1) 1.000 . Uani d ?

C(35) 0.8596(5) 0.0228(3) -0.1512(3) 0.038(1) 1.000 . Uani d ?

C(36) 0.7586(6) 0.0984(4) -0.1574(3) 0.047(2) 1.000 . Uani d ?

C(37) 0.6541(5) 0.1117(3) -0.0823(4) 0.040(1) 1.000 . Uani d ?

C(38) 0.6477(4) 0.0485(3) 0.0021(3) 0.031(1) 1.000 . Uani d ?

C(39) 0.7183(3) 0.0311(2) 0.4860(2) 0.0142(8) 1.000 . Uani d ?

C(40) 0.6320(3) 0.1252(3) 0.5007(3) 0.0205(9) 1.000 . Uani d ?

C(41) 0.6417(4) 0.2044(3) 0.5494(3) 0.023(1) 1.000 . Uani d ?

C(42) 0.7399(4) 0.1913(3) 0.5816(3) 0.024(1) 1.000 . Uani d ?

C(43) 0.8271(4) 0.0987(3) 0.5663(3) 0.025(1) 1.000 . Uani d ?

C(44) 0.8170(3) 0.0178(3) 0.5185(3) 0.0197(9) 1.000 . Uani d ?

C(45) 0.9928(4) -0.2383(3) 0.2765(4) 0.041(1) 1.000 . Uani d ?

C(46) 1.0115(4) -0.5789(4) 0.3124(4) 0.045(1) 1.000 . Uani d ?

C(47) 1.0232(4) -0.6752(4) 0.4616(4) 0.045(1) 1.000 . Uani d ?

C(48) 1.0378(6) -0.7651(5) 0.3164(5) 0.070(2) 1.000 . Uani d ?

H(1) 0.7196 -0.6189 0.4644 0.019 1.000 . Uiso c ?

H(2) 0.7688 -0.6504 0.2854 0.021 1.000 . Uiso c ?

H(3) 0.7739 0.0879 0.1311 0.027 1.000 . Uiso c ?

H(4) 0.7640 0.1093 0.3053 0.023 1.000 . Uiso c ?

H(5) 0.8124 -0.4681 0.6246 0.021 1.000 . Uiso c ?

H(6) 0.7959 -0.5719 0.7686 0.028 1.000 . Uiso c ?

H(7) 0.6333 -0.6474 0.8321 0.027 1.000 . Uiso c ?

H(8) 0.4897 -0.6210 0.7487 0.025 1.000 . Uiso c ?

H(9) 0.5052 -0.5156 0.6041 0.019 1.000 . Uiso c ?

H(10) 0.6213 -0.5847 0.1500 0.034 1.000 . Uiso c ?

H(11) 0.6707 -0.7333 0.0549 0.043 1.000 . Uiso c ?

H(12) 0.8688 -0.8023 -0.0416 0.047 1.000 . Uiso c ?

H(13) 1.0186 -0.7229 -0.0475 0.044 1.000 . Uiso c ?

H(14) 0.9702 -0.5739 0.0498 0.032 1.000 . Uiso c ?

H(15) 0.9255 -0.0947 -0.0641 0.036 1.000 . Uiso c ?

H(16) 0.9348 0.0147 -0.2049 0.046 1.000 . Uiso c ?

H(17) 0.7620 0.1427 -0.2165 0.057 1.000 . Uiso c ?

H(18) 0.5833 0.1659 -0.0874 0.048 1.000 . Uiso c ?

H(19) 0.5734 0.0596 0.0570 0.037 1.000 . Uiso c ?

H(20) 0.5633 0.1358 0.4765 0.025 1.000 . Uiso c ?

H(21) 0.5788 0.2699 0.5611 0.028 1.000 . Uiso c ?

H(22) 0.7474 0.2477 0.6151 0.029 1.000 . Uiso c ?

H(23) 0.8967 0.0893 0.5890 0.030 1.000 . Uiso c ?

H(24) 0.8794 -0.0479 0.5080 0.024 1.000 . Uiso c ?

H(25) 1.0779 -0.2741 0.2617 0.049 1.000 . Uiso c ?

H(26) 0.9818 -0.1813 0.2291 0.049 1.000 . Uiso c ?

H(27) 0.9626 -0.2106 0.3430 0.049 1.000 . Uiso c ?

H(28) 1.0125 -0.5790 0.2439 0.054 1.000 . Uiso c ?

H(29) 0.9438 -0.6368 0.5012 0.054 1.000 . Uiso c ?

H(30) 1.0390 -0.7479 0.4837 0.054 1.000 . Uiso c ?

H(31) 1.0836 -0.6446 0.4690 0.054 1.000 . Uiso c ?

H(32) 0.9639 -0.7601 0.3013 0.084 1.000 . Uiso c ?

H(33) 1.1052 -0.7766 0.2558 0.084 1.000 . Uiso c ?

H(34) 1.0508 -0.8231 0.3625 0.084 1.000 . Uiso c ?

H(35) 0.945(5) -0.366(5) 0.293(5) 0.064(8) 1.000 . Uiso d ?


loop_

_atom_site_aniso_label

_atom_site_aniso_U_11

_atom_site_aniso_U_22

_atom_site_aniso_U_33

_atom_site_aniso_U_12

_atom_site_aniso_U_13

_atom_site_aniso_U_23

   Br(1)  0.0403(2)   0.0150(2)   0.0120(2)   -0.0079(2)  -0.0010(2)  -0.0041(1)

   Br(2)  0.0444(2)   0.0194(2)   0.0130(2)   -0.0126(2)  0.0061(2)   -0.0009(1)

   Br(3)  0.0841(4)   0.0252(2)   0.0243(2)   -0.0213(2)  -0.0284(2)  -0.0013(2)

   Br(4)  0.0524(3)   0.0255(2)   0.0177(2)   -0.0111(2)  -0.0198(2)  0.0036(2)

   Zn(1)  0.0184(2)   0.0076(2)   0.0099(2)   -0.0046(2)  -0.0047(2)  0.0011(1)

   O(1)   0.016(1)    0.018(1)    0.032(2)    -0.004(1)   -0.004(1)   0.004(1)

   O(2)   0.039(2)    0.038(2)    0.102(3)    -0.023(2)   -0.046(2)   0.035(2)

   N(1)   0.016(1)    0.009(1)    0.011(1)    -0.004(1)   -0.004(1)   0.002(1)

   N(2)   0.016(1)    0.010(1)    0.012(1)    -0.004(1)   -0.004(1)   0.000(1)

   N(3)   0.023(2)    0.010(1)    0.011(1)    -0.007(1)   -0.006(1)   0.000(1)

   N(4)   0.020(1)    0.009(1)    0.009(1)    -0.002(1)   -0.005(1)   0.000(1)

   N(5)   0.025(2)    0.030(2)    0.053(3)    -0.003(2)   -0.005(2)   0.010(2)

   C(1)   0.015(2)    0.011(1)    0.013(2)    -0.004(1)   -0.005(1)   -0.001(1)

   C(2)   0.019(2)    0.011(1)    0.015(2)    -0.007(1)   -0.006(1)   0.001(1)

   C(3)   0.016(2)    0.015(2)    0.012(2)    -0.006(1)   -0.001(1)   0.001(1)

   C(4)   0.012(2)    0.012(1)    0.008(2)    -0.003(1)   -0.004(1)   0.003(1)

   C(5)   0.014(2)    0.012(2)    0.015(2)    -0.007(1)   -0.008(1)   0.004(1)

   C(6)   0.013(2)    0.009(1)    0.015(2)    -0.004(1)   -0.006(1)   0.002(1)

   C(7)   0.019(2)    0.011(1)    0.018(2)    -0.005(1)   -0.006(1)   0.003(1)

   C(8)   0.026(2)    0.008(1)    0.015(2)    -0.004(1)   -0.005(1)   0.000(1)

   C(9)   0.015(2)    0.007(1)    0.015(2)    -0.006(1)   -0.004(1)   0.000(1)

   C(10)  0.021(2)    0.012(2)    0.014(2)    -0.006(1)   -0.002(1)   -0.004(1)

   C(11)  0.019(2)    0.014(2)    0.013(2)    -0.007(1)   -0.002(1)   -0.004(1)

   C(12)  0.030(2)    0.019(2)    0.015(2)    -0.009(2)   -0.007(2)   -0.003(1)

   C(13)  0.027(2)    0.020(2)    0.010(2)    -0.008(2)   -0.004(1)   0.001(1)

   C(14)  0.019(2)    0.014(2)    0.008(2)    -0.004(1)   -0.002(1)   0.000(1)

   C(15)  0.022(2)    0.011(2)    0.012(2)    -0.002(1)   -0.003(1)   0.001(1)

   C(16)  0.023(2)    0.010(1)    0.013(2)    -0.003(1)   -0.004(1)   0.002(1)

   C(17)  0.040(2)    0.012(2)    0.017(2)    -0.008(2)   -0.010(2)   0.005(1)

   C(18)  0.032(2)    0.011(2)    0.016(2)    -0.008(2)   -0.007(2)   0.000(1)

   C(19)  0.024(2)    0.008(1)    0.016(2)    -0.005(1)   -0.009(1)   0.000(1)

   C(20)  0.017(2)    0.008(1)    0.015(2)    -0.001(1)   -0.006(1)   -0.001(1)

   C(21)  0.017(2)    0.008(1)    0.009(2)    -0.001(1)   -0.003(1)   -0.001(1)

   C(22)  0.019(2)    0.016(2)    0.018(2)    -0.004(1)   -0.009(1)   0.000(1)

   C(23)  0.032(2)    0.020(2)    0.018(2)    0.002(2)    -0.015(2)   -0.002(1)

   C(24)  0.038(2)    0.014(2)    0.007(2)    -0.001(2)   -0.003(2)   0.002(1)

   C(25)  0.026(2)    0.014(2)    0.021(2)    -0.008(2)   -0.002(2)   0.004(1)

   C(26)  0.017(2)    0.013(2)    0.018(2)    -0.002(1)   -0.008(1)   -0.001(1)

   C(27)  0.028(2)    0.010(1)    0.012(2)    -0.006(2)   -0.002(1)   -0.001(1)

   C(28)  0.037(2)    0.024(2)    0.019(2)    -0.017(2)   0.007(2)    -0.009(2)

   C(29)  0.054(3)    0.027(2)    0.025(2)    -0.026(2)   0.004(2)    -0.009(2)

   C(30)  0.071(3)    0.019(2)    0.021(2)    -0.011(2)   -0.001(2)   -0.009(2)

   C(31)  0.040(3)    0.028(2)    0.029(2)    0.004(2)    0.001(2)    -0.012(2)

   C(32)  0.029(2)    0.024(2)    0.022(2)    -0.006(2)   0.000(2)    -0.006(2)

   C(33)  0.043(2)    0.013(2)    0.008(2)    -0.010(2)   -0.009(2)   0.003(1)

   C(34)  0.041(2)    0.026(2)    0.022(2)    -0.011(2)   -0.007(2)   0.000(2)

   C(35)  0.067(3)    0.033(2)    0.016(2)    -0.026(2)   -0.003(2)   0.003(2)

   C(36)  0.103(5)    0.028(2)    0.022(2)    -0.028(3)   -0.028(3)   0.012(2)

   C(37)  0.069(3)    0.022(2)    0.032(3)    -0.005(2)   -0.029(3)   0.010(2)

   C(38)  0.047(3)    0.021(2)    0.023(2)    -0.003(2)   -0.014(2)   0.002(2)

   C(39)  0.022(2)    0.013(1)    0.010(2)    -0.007(1)   -0.004(1)   0.001(1)

   C(40)  0.029(2)    0.015(2)    0.021(2)    -0.008(2)   -0.011(2)   0.001(1)

   C(41)  0.036(2)    0.009(2)    0.023(2)    -0.004(2)   -0.009(2)   -0.003(1)

   C(42)  0.037(2)    0.019(2)    0.022(2)    -0.015(2)   -0.010(2)   -0.004(1)

   C(43)  0.027(2)    0.031(2)    0.025(2)    -0.012(2)   -0.013(2)   -0.003(2)

   C(44)  0.019(2)    0.019(2)    0.021(2)    -0.002(2)   -0.008(2)   0.000(1)

   C(45)  0.031(2)    0.030(2)    0.067(4)    -0.014(2)   -0.018(2)   0.001(2)

   C(46)  0.027(2)    0.049(3)    0.063(4)    -0.017(2)   -0.023(2)   0.027(3)

   C(47)  0.035(3)    0.039(3)    0.056(3)    -0.008(2)   -0.014(2)   0.024(2)

   C(48)  0.072(4)    0.049(3)    0.072(5)    -0.006(3)   -0.004(4)   -0.010(3)

#------------------------------------------------------------------------------

_refine_special_details

;

   ?

;

_refine_ls_structure_factor_coef       Fsqd

_refine_ls_matrix_type                 full

_refine_ls_weighting_scheme            sigma

_refine_ls_weighting_details           'w = 1/[\s^2^(Fo^2^)]'

_refine_ls_hydrogen_treatment          ?

_refine_ls_extinction_method           none

_refine_ls_extinction_coef             ?

_refine_ls_abs_structure_details       ?

_refine_ls_abs_structure_Flack         ?

_refine_ls_number_reflns               8177

_refine_ls_number_parameters           545

_refine_ls_number_restraints           0

_refine_ls_number_constraints          0

_refine_ls_R_factor_all                0.0584

_refine_ls_R_factor_gt                 0.033

_refine_ls_wR_factor_all               0.0891

_refine_ls_wR_factor_ref               0.041

_refine_ls_goodness_of_fit_all         1.063

_refine_ls_goodness_of_fit_ref         1.063

_refine_ls_shift/su_max                0.0294

_refine_ls_shift/su_mean               0.0176

_refine_diff_density_min               -0.84

_refine_diff_density_max               0.87

#------------------------------------------------------------------------------

_geom_special_details

;

   ?

;

loop_

_geom_bond_atom_site_label_1

_geom_bond_atom_site_label_2

_geom_bond_distance

_geom_bond_site_symmetry_1

_geom_bond_site_symmetry_2

_geom_bond_publ_flag

   Br(1) C(2) 1.871(3) . . yes

   Br(2) C(3) 1.868(3) . . yes

   Br(3) C(12) 1.874(3) . . yes

   Br(4) C(13) 1.872(4) . . yes

   Zn(1) O(1) 2.108(3) . . yes

   Zn(1) N(1) 2.121(3) . . yes

   Zn(1) N(2) 2.030(2) . . yes

   Zn(1) N(3) 2.109(3) . . yes

   Zn(1) N(4) 2.021(3) . . yes

   O(1) C(45) 1.414(5) . . yes

   O(1) H(35) 0.79(6) . . no

   O(2) C(46) 1.237(7) . . yes

   N(1) C(1) 1.371(4) . . yes

   N(1) C(4) 1.374(4) . . yes

   N(2) C(6) 1.372(4) . . yes

   N(2) C(9) 1.369(4) . . yes

   N(3) C(11) 1.383(4) . . yes

   N(3) C(14) 1.371(4) . . yes

   N(4) C(16) 1.365(4) . . yes

   N(4) C(19) 1.375(4) . . yes

   N(5) C(46) 1.329(5) . . yes

   N(5) C(47) 1.436(7) . . yes

   N(5) C(48) 1.450(7) . . yes

   C(1) C(2) 1.451(5) . . yes

   C(1) C(20) 1.408(4) . . yes

   C(2) C(3) 1.357(4) . . yes

   C(3) C(4) 1.449(5) . . yes

   C(4) C(5) 1.411(4) . . yes

   C(5) C(6) 1.400(5) . . yes

   C(5) C(21) 1.499(4) . . yes

   C(6) C(7) 1.445(4) . . yes

   C(7) C(8) 1.342(5) . . yes

   C(7) H(1) 0.98 . . no

   C(8) C(9) 1.450(4) . . yes

   C(8) H(2) 0.98 . . no

   C(9) C(10) 1.395(5) . . yes

   C(10) C(11) 1.411(5) . . yes

   C(10) C(27) 1.508(4) . . yes

   C(11) C(12) 1.448(5) . . yes

   C(12) C(13) 1.344(5) . . yes

   C(13) C(14) 1.446(5) . . yes

   C(14) C(15) 1.405(4) . . yes

   C(15) C(16) 1.405(5) . . yes

   C(15) C(33) 1.499(5) . . yes

   C(16) C(17) 1.449(4) . . yes

   C(17) C(18) 1.346(5) . . yes

   C(17) H(3) 0.98 . . no

   C(18) C(19) 1.439(4) . . yes

   C(18) H(4) 0.98 . . no

   C(19) C(20) 1.405(5) . . yes

   C(20) C(39) 1.501(4) . . yes

   C(21) C(22) 1.390(5) . . yes

   C(21) C(26) 1.390(4) . . yes

   C(22) C(23) 1.382(5) . . yes

   C(22) H(5) 0.98 . . no

   C(23) C(24) 1.387(5) . . yes

   C(23) H(6) 0.98 . . no

   C(24) C(25) 1.382(5) . . yes

   C(24) H(7) 0.98 . . no

   C(25) C(26) 1.396(5) . . yes

   C(25) H(8) 0.98 . . no

   C(26) H(9) 0.98 . . no

   C(27) C(28) 1.385(5) . . yes

   C(27) C(32) 1.381(5) . . yes

   C(28) C(29) 1.387(5) . . yes

   C(28) H(10) 0.98 . . no

   C(29) C(30) 1.375(7) . . yes

   C(29) H(11) 0.98 . . no

   C(30) C(31) 1.368(7) . . yes

   C(30) H(12) 0.98 . . no

   C(31) C(32) 1.407(6) . . yes

   C(31) H(13) 0.98 . . no

   C(32) H(14) 0.98 . . no

   C(33) C(34) 1.394(6) . . yes

   C(33) C(38) 1.388(6) . . yes

   C(34) C(35) 1.383(6) . . yes

   C(34) H(15) 0.98 . . no

   C(35) C(36) 1.383(8) . . yes

   C(35) H(16) 0.98 . . no

   C(36) C(37) 1.365(8) . . yes

   C(36) H(17) 0.98 . . no

   C(37) C(38) 1.398(6) . . yes

   C(37) H(18) 0.98 . . no

   C(38) H(19) 0.98 . . no

   C(39) C(40) 1.386(5) . . yes

   C(39) C(44) 1.392(5) . . yes

   C(40) C(41) 1.388(5) . . yes

   C(40) H(20) 0.98 . . no

   C(41) C(42) 1.385(5) . . yes

   C(41) H(21) 0.98 . . no

   C(42) C(43) 1.376(6) . . yes

   C(42) H(22) 0.98 . . no

   C(43) C(44) 1.400(5) . . yes

   C(43) H(23) 0.98 . . no

   C(44) H(24) 0.98 . . no

   C(45) H(25) 0.98 . . no

   C(45) H(26) 0.98 . . no

   C(45) H(27) 0.98 . . no

   C(46) H(28) 0.98 . . no

   C(47) H(29) 0.98 . . no

   C(47) H(30) 0.98 . . no

   C(47) H(31) 0.98 . . no

   C(48) H(32) 0.98 . . no

   C(48) H(33) 0.98 . . no

   C(48) H(34) 0.98 . . no

#------------------------------------------------------------------------------

loop_

_geom_angle_atom_site_label_1

_geom_angle_atom_site_label_2

_geom_angle_atom_site_label_3

_geom_angle

_geom_angle_site_symmetry_1

_geom_angle_site_symmetry_2

_geom_angle_site_symmetry_3

_geom_angle_publ_flag

   O(1) Zn(1)  N(1) 98.3(1) . . . yes

   O(1) Zn(1)  N(2) 97.3(1) . . . yes

   O(1) Zn(1)  N(3) 97.8(1) . . . yes

   O(1) Zn(1)  N(4) 97.3(1) . . . yes

   N(1) Zn(1)  N(2) 89.1(1) . . . yes

   N(1) Zn(1)  N(3) 163.9(1) . . . yes

   N(1) Zn(1)  N(4) 89.0(1) . . . yes

   N(2) Zn(1)  N(3) 89.0(1) . . . yes

   N(2) Zn(1)  N(4) 165.4(1) . . . yes

   N(3) Zn(1)  N(4) 88.9(1) . . . yes

   Zn(1) O(1)  C(45) 121.9(3) . . . yes

   Zn(1) O(1)  H(35) 107(4) . . . no

   C(45) O(1)  H(35) 119(4) . . . no

   Zn(1) N(1)  C(1) 125.5(2) . . . yes

   Zn(1) N(1)  C(4) 125.9(2) . . . yes

   C(1) N(1)  C(4) 108.5(3) . . . yes

   Zn(1) N(2)  C(6) 125.9(2) . . . yes

   Zn(1) N(2)  C(9) 124.3(2) . . . yes

   C(6) N(2)  C(9) 107.1(3) . . . yes

   Zn(1) N(3)  C(11) 125.4(2) . . . yes

   Zn(1) N(3)  C(14) 126.8(2) . . . yes

   C(11) N(3)  C(14) 107.8(3) . . . yes

   Zn(1) N(4)  C(16) 126.1(2) . . . yes

   Zn(1) N(4)  C(19) 125.1(2) . . . yes

   C(16) N(4)  C(19) 106.2(3) . . . yes

   C(46) N(5)  C(47) 121.1(5) . . . yes

   C(46) N(5)  C(48) 121.8(5) . . . yes

   C(47) N(5)  C(48) 116.8(4) . . . yes

   N(1) C(1)  C(2) 108.7(3) . . . yes

   N(1) C(1)  C(20) 124.2(3) . . . yes

   C(2) C(1)  C(20) 127.0(3) . . . yes

   Br(1) C(2)  C(1) 129.5(2) . . . yes

   Br(1) C(2)  C(3) 123.4(3) . . . yes

   C(1) C(2)  C(3) 106.8(3) . . . yes

   Br(2) C(3)  C(2) 122.6(3) . . . yes

   Br(2) C(3)  C(4) 128.7(2) . . . yes

   C(2) C(3)  C(4) 108.1(3) . . . yes

   N(1) C(4)  C(3) 107.9(3) . . . yes

   N(1) C(4)  C(5) 124.6(3) . . . yes

   C(3) C(4)  C(5) 127.4(3) . . . yes

   C(4) C(5)  C(6) 124.8(3) . . . yes

   C(4) C(5)  C(21) 118.6(3) . . . yes

   C(6) C(5)  C(21) 116.4(3) . . . yes

   N(2) C(6)  C(5) 127.0(3) . . . yes

   N(2) C(6)  C(7) 108.9(3) . . . yes

   C(5) C(6)  C(7) 124.1(3) . . . yes

   C(6) C(7)  C(8) 107.8(3) . . . yes

   C(6) C(7)  H(1) 126.1 . . . no

   C(8) C(7)  H(1) 126.1 . . . no

   C(7) C(8)  C(9) 107.0(3) . . . yes

   C(7) C(8)  H(2) 126.5 . . . no

   C(9) C(8)  H(2) 126.5 . . . no

   N(2) C(9)  C(8) 109.2(3) . . . yes

   N(2) C(9)  C(10) 126.8(3) . . . yes

   C(8) C(9)  C(10) 123.9(3) . . . yes

   C(9) C(10)  C(11) 125.4(3) . . . yes

   C(9) C(10)  C(27) 116.3(3) . . . yes

   C(11) C(10)  C(27) 118.3(3) . . . yes

   N(3) C(11)  C(10) 123.8(3) . . . yes

   N(3) C(11)  C(12) 108.0(3) . . . yes

   C(10) C(11)  C(12) 128.2(3) . . . yes

   Br(3) C(12)  C(11) 129.6(2) . . . yes

   Br(3) C(12)  C(13) 122.4(3) . . . yes

   C(11) C(12)  C(13) 107.9(3) . . . yes

   Br(4) C(13)  C(12) 122.5(3) . . . yes

   Br(4) C(13)  C(14) 129.6(3) . . . yes

   C(12) C(13)  C(14) 107.6(3) . . . yes

   N(3) C(14)  C(13) 108.5(3) . . . yes

   N(3) C(14)  C(15) 123.7(3) . . . yes

   C(13) C(14)  C(15) 127.7(3) . . . yes

   C(14) C(15)  C(16) 125.4(3) . . . yes

   C(14) C(15)  C(33) 118.6(3) . . . yes

   C(16) C(15)  C(33) 116.0(3) . . . yes

   N(4) C(16)  C(15) 126.4(3) . . . yes

   N(4) C(16)  C(17) 110.0(3) . . . yes

   C(15) C(16)  C(17) 123.6(3) . . . yes

   C(16) C(17)  C(18) 106.7(3) . . . yes

   C(16) C(17)  H(3) 126.6 . . . no

   C(18) C(17)  H(3) 126.6 . . . no

   C(17) C(18)  C(19) 107.3(3) . . . yes

   C(17) C(18)  H(4) 126.4 . . . no

   C(19) C(18)  H(4) 126.4 . . . no

   N(4) C(19)  C(18) 109.8(3) . . . yes

   N(4) C(19)  C(20) 125.9(3) . . . yes

   C(18) C(19)  C(20) 124.2(3) . . . yes

   C(1) C(20)  C(19) 125.5(3) . . . yes

   C(1) C(20)  C(39) 119.1(3) . . . yes

   C(19) C(20)  C(39) 115.4(3) . . . yes

   C(5) C(21)  C(22) 119.2(3) . . . yes

   C(5) C(21)  C(26) 121.9(3) . . . yes

   C(22) C(21)  C(26) 118.9(3) . . . yes

   C(21) C(22)  C(23) 120.8(3) . . . yes

   C(21) C(22)  H(5) 119.6 . . . no

   C(23) C(22)  H(5) 119.6 . . . no

   C(22) C(23)  C(24) 120.1(3) . . . yes

   C(22) C(23)  H(6) 119.9 . . . no

   C(24) C(23)  H(6) 119.9 . . . no

   C(23) C(24)  C(25) 119.6(3) . . . yes

   C(23) C(24)  H(7) 120.2 . . . no

   C(25) C(24)  H(7) 120.2 . . . no

   C(24) C(25)  C(26) 120.3(3) . . . yes

   C(24) C(25)  H(8) 119.8 . . . no

   C(26) C(25)  H(8) 119.9 . . . no

   C(21) C(26)  C(25) 120.1(3) . . . yes

   C(21) C(26)  H(9) 119.9 . . . no

   C(25) C(26)  H(9) 119.9 . . . no

   C(10) C(27)  C(28) 120.7(3) . . . yes

   C(10) C(27)  C(32) 120.0(3) . . . yes

   C(28) C(27)  C(32) 119.4(3) . . . yes

   C(27) C(28)  C(29) 120.4(4) . . . yes

   C(27) C(28)  H(10) 119.8 . . . no

   C(29) C(28)  H(10) 119.8 . . . no

   C(28) C(29)  C(30) 119.9(4) . . . yes

   C(28) C(29)  H(11) 120.0 . . . no

   C(30) C(29)  H(11) 120.0 . . . no

   C(29) C(30)  C(31) 120.7(4) . . . yes

   C(29) C(30)  H(12) 119.6 . . . no

   C(31) C(30)  H(12) 119.6 . . . no

   C(30) C(31)  C(32) 119.5(4) . . . yes

   C(30) C(31)  H(13) 120.2 . . . no

   C(32) C(31)  H(13) 120.3 . . . no

   C(27) C(32)  C(31) 120.1(4) . . . yes

   C(27) C(32)  H(14) 119.9 . . . no

   C(31) C(32)  H(14) 119.9 . . . no

   C(15) C(33)  C(34) 120.9(4) . . . yes

   C(15) C(33)  C(38) 119.8(4) . . . yes

   C(34) C(33)  C(38) 119.3(3) . . . yes

   C(33) C(34)  C(35) 120.4(4) . . . yes

   C(33) C(34)  H(15) 119.7 . . . no

   C(35) C(34)  H(15) 119.8 . . . no

   C(34) C(35)  C(36) 119.6(4) . . . yes

   C(34) C(35)  H(16) 120.2 . . . no

   C(36) C(35)  H(16) 120.2 . . . no

   C(35) C(36)  C(37) 120.7(4) . . . yes

   C(35) C(36)  H(17) 119.6 . . . no

   C(37) C(36)  H(17) 119.7 . . . no

   C(36) C(37)  C(38) 120.2(4) . . . yes

   C(36) C(37)  H(18) 119.9 . . . no

   C(38) C(37)  H(18) 119.9 . . . no

   C(33) C(38)  C(37) 119.6(4) . . . yes

   C(33) C(38)  H(19) 120.2 . . . no

   C(37) C(38)  H(19) 120.2 . . . no

   C(20) C(39)  C(40) 121.4(3) . . . yes

   C(20) C(39)  C(44) 119.5(3) . . . yes

   C(40) C(39)  C(44) 119.1(3) . . . yes

   C(39) C(40)  C(41) 120.7(3) . . . yes

   C(39) C(40)  H(20) 119.6 . . . no

   C(41) C(40)  H(20) 119.6 . . . no

   C(40) C(41)  C(42) 120.2(3) . . . yes

   C(40) C(41)  H(21) 119.9 . . . no

   C(42) C(41)  H(21) 119.9 . . . no

   C(41) C(42)  C(43) 119.7(3) . . . yes

   C(41) C(42)  H(22) 120.2 . . . no

   C(43) C(42)  H(22) 120.2 . . . no

   C(42) C(43)  C(44) 120.5(3) . . . yes

   C(42) C(43)  H(23) 119.8 . . . no

   C(44) C(43)  H(23) 119.8 . . . no

   C(39) C(44)  C(43) 119.9(3) . . . yes

   C(39) C(44)  H(24) 120.1 . . . no

   C(43) C(44)  H(24) 120.0 . . . no

   O(1) C(45)  H(25) 109.5 . . . no

   O(1) C(45)  H(26) 109.5 . . . no

   O(1) C(45)  H(27) 109.4 . . . no

   H(25) C(45)  H(26) 109.5 . . . no

   H(25) C(45)  H(27) 109.4 . . . no

   H(26) C(45)  H(27) 109.4 . . . no

   O(2) C(46)  N(5) 124.1(5) . . . yes

   O(2) C(46)  H(28) 118.0 . . . no

   N(5) C(46)  H(28) 117.9 . . . no

   N(5) C(47)  H(29) 109.4 . . . no

   N(5) C(47)  H(30) 109.4 . . . no

   N(5) C(47)  H(31) 109.5 . . . no

   H(29) C(47)  H(30) 109.5 . . . no

   H(29) C(47)  H(31) 109.5 . . . no

   H(30) C(47)  H(31) 109.5 . . . no

   N(5) C(48)  H(32) 109.4 . . . no

   N(5) C(48)  H(33) 109.4 . . . no

   N(5) C(48)  H(34) 109.4 . . . no

   H(32) C(48)  H(33) 109.5 . . . no

   H(32) C(48)  H(34) 109.6 . . . no

   H(33) C(48)  H(34) 109.6 . . . no

#------------------------------------------------------------------------------

loop_

_geom_contact_atom_site_label_1

_geom_contact_atom_site_label_2

_geom_contact_distance

_geom_contact_site_symmetry_1

_geom_contact_site_symmetry_2

_geom_contact_publ_flag

   Br(1)     Br(4)     3.5782(5)  . 1_556 no

   Br(2)     C(28)     3.505(4)   . 2_646 no

   Br(3)     C(23)     3.361(4)   . 1_554 no

   O(1)      O(2)      2.639(4)   . . no

   O(1)      C(46)     3.517(6)   . . no

   O(2)      C(22)     3.172(4)   . 2_746 no

   O(2)      C(6)      3.325(5)   . . no

   O(2)      N(2)      3.375(4)   . . no

   O(2)      C(23)     3.396(5)   . 2_746 no

   O(2)      C(45)     3.482(5)   . . no

   O(2)      C(7)      3.543(4)   . . no

   N(5)      C(7)      3.458(5)   . . no

   N(5)      C(8)      3.524(5)   . . no

   C(6)      C(46)     3.597(6)   . . no

   C(7)      C(46)     3.323(6)   . . no

   C(8)      C(46)     3.214(5)   . . no

   C(8)      C(26)     3.579(5)   . 2_646 no

   C(9)      C(46)     3.425(5)   . . no

   C(9)      C(25)     3.480(5)   . 2_646 no

   C(9)      C(26)     3.556(5)   . 2_646 no

   C(10)     C(25)     3.570(5)   . 2_646 no

   C(25)     C(42)     3.544(5)   . 1_545 no

#------------------------------------------------------------------------------

loop_

_geom_torsion_atom_site_label_1

_geom_torsion_atom_site_label_2

_geom_torsion_atom_site_label_3

_geom_torsion_atom_site_label_4

_geom_torsion_site_symmetry_1

_geom_torsion_site_symmetry_2

_geom_torsion_site_symmetry_3

_geom_torsion_site_symmetry_4

_geom_torsion

_geom_torsion_publ_flag

   Br(1) C(2) C(1) N(1) . . . . -173.9(2) no

   Br(1) C(2) C(1) C(20) . . . . 4.3(5) no

   Br(1) C(2) C(3) Br(2) . . . . 4.3(4) no

   Br(1) C(2) C(3) C(4) . . . . 176.2(2) no

   Br(2) C(3) C(2) C(1) . . . . -170.1(2) no

   Br(2) C(3) C(4) N(1) . . . . 168.2(2) no

   Br(2) C(3) C(4) C(5) . . . . -16.1(5) no

   Br(3) C(12) C(11) N(3) . . . . -174.3(3) no

   Br(3) C(12) C(11) C(10) . . . . 3.8(6) no

   Br(3) C(12) C(13) Br(4) . . . . 2.7(5) no

   Br(3) C(12) C(13) C(14) . . . . 177.6(3) no

   Br(4) C(13) C(12) C(11) . . . . -172.5(3) no

   Br(4) C(13) C(14) N(3) . . . . 170.0(3) no

   Br(4) C(13) C(14) C(15) . . . . -14.2(6) no

   Zn(1) N(1) C(1) C(2) . . . . 173.6(2) no

   Zn(1) N(1) C(1) C(20) . . . . -4.7(5) no

   Zn(1) N(1) C(4) C(3) . . . . -172.5(2) no

   Zn(1) N(1) C(4) C(5) . . . . 11.7(4) no

   Zn(1) N(2) C(6) C(5) . . . . 18.5(5) no

   Zn(1) N(2) C(6) C(7) . . . . -160.9(2) no

   Zn(1) N(2) C(9) C(8) . . . . 161.3(2) no

   Zn(1) N(2) C(9) C(10) . . . . -21.7(5) no

   Zn(1) N(3) C(11) C(10) . . . . -2.1(5) no

   Zn(1) N(3) C(11) C(12) . . . . 176.1(2) no

   Zn(1) N(3) C(14) C(13) . . . . -174.6(2) no

   Zn(1) N(3) C(14) C(15) . . . . 9.4(5) no

   Zn(1) N(4) C(16) C(15) . . . . 20.5(5) no

   Zn(1) N(4) C(16) C(17) . . . . -161.0(2) no

   Zn(1) N(4) C(19) C(18) . . . . 160.5(2) no

   Zn(1) N(4) C(19) C(20) . . . . -22.1(5) no

   O(1) Zn(1) N(1) C(1) . . . . 87.3(3) no

   O(1) Zn(1) N(1) C(4) . . . . -97.9(3) no

   O(1) Zn(1) N(2) C(6) . . . . 85.0(3) no

   O(1) Zn(1) N(2) C(9) . . . . -74.1(3) no

   O(1) Zn(1) N(3) C(11) . . . . 84.4(3) no

   O(1) Zn(1) N(3) C(14) . . . . -96.4(3) no

   O(1) Zn(1) N(4) C(16) . . . . 83.1(3) no

   O(1) Zn(1) N(4) C(19) . . . . -76.0(3) no

   O(2) C(46) N(5) C(47) . . . . 2.3(7) no

   O(2) C(46) N(5) C(48) . . . . 175.2(5) no

   N(1) Zn(1) O(1) C(45) . . . . -67.1(3) no

   N(1) Zn(1) N(2) C(6) . . . . -13.2(3) no

   N(1) Zn(1) N(2) C(9) . . . . -172.3(3) no

   N(1) Zn(1) N(3) C(11) . . . . -96.1(4) no

   N(1) Zn(1) N(3) C(14) . . . . 83.2(4) no

   N(1) Zn(1) N(4) C(16) . . . . -178.7(3) no

   N(1) Zn(1) N(4) C(19) . . . . 22.2(3) no

   N(1) C(1) C(2) C(3) . . . . 0.0(4) no

   N(1) C(1) C(20) C(19) . . . . 13.5(5) no

   N(1) C(1) C(20) C(39) . . . . -166.2(3) no

   N(1) C(4) C(3) C(2) . . . . -3.1(4) no

   N(1) C(4) C(5) C(6) . . . . -10.8(5) no

   N(1) C(4) C(5) C(21) . . . . 163.7(3) no

   N(2) Zn(1) O(1) C(45) . . . . -157.3(3) no

   N(2) Zn(1) N(1) C(1) . . . . -175.4(3) no

   N(2) Zn(1) N(1) C(4) . . . . -0.7(3) no

   N(2) Zn(1) N(3) C(11) . . . . -12.9(3) no

   N(2) Zn(1) N(3) C(14) . . . . 166.4(3) no

   N(2) Zn(1) N(4) C(16) . . . . -96.3(5) no

   N(2) Zn(1) N(4) C(19) . . . . 104.6(5) no

   N(2) C(6) C(5) C(4) . . . . -5.4(5) no

   N(2) C(6) C(5) C(21) . . . . -179.9(3) no

   N(2) C(6) C(7) C(8) . . . . -0.8(4) no

   N(2) C(9) C(8) C(7) . . . . 0.5(4) no

   N(2) C(9) C(10) C(11) . . . . -1.1(6) no

   N(2) C(9) C(10) C(27) . . . . -179.8(3) no

   N(3) Zn(1) O(1) C(45) . . . . 112.7(3) no

   N(3) Zn(1) N(1) C(1) . . . . -92.3(4) no

   N(3) Zn(1) N(1) C(4) . . . . 82.5(4) no

   N(3) Zn(1) N(2) C(6) . . . . -177.2(3) no

   N(3) Zn(1) N(2) C(9) . . . . 23.7(3) no

   N(3) Zn(1) N(4) C(16) . . . . -14.7(3) no

   N(3) Zn(1) N(4) C(19) . . . . -173.7(3) no

   N(3) C(11) C(10) C(9) . . . . 13.6(6) no

   N(3) C(11) C(10) C(27) . . . . -167.7(3) no

   N(3) C(11) C(12) C(13) . . . . 0.4(4) no

   N(3) C(14) C(13) C(12) . . . . -4.5(4) no

   N(3) C(14) C(15) C(16) . . . . -8.3(6) no

   N(3) C(14) C(15) C(33) . . . . 170.2(3) no

   N(4) Zn(1) O(1) C(45) . . . . 22.9(3) no

   N(4) Zn(1) N(1) C(1) . . . . -9.9(3) no

   N(4) Zn(1) N(1) C(4) . . . . 164.9(3) no

   N(4) Zn(1) N(2) C(6) . . . . -95.6(5) no

   N(4) Zn(1) N(2) C(9) . . . . 105.3(5) no

   N(4) Zn(1) N(3) C(11) . . . . -178.4(3) no

   N(4) Zn(1) N(3) C(14) . . . . 0.8(3) no

   N(4) C(16) C(15) C(14) . . . . -7.5(6) no

   N(4) C(16) C(15) C(33) . . . . 173.9(3) no

   N(4) C(16) C(17) C(18) . . . . -0.1(4) no

   N(4) C(19) C(18) C(17) . . . . 2.0(4) no

   N(4) C(19) C(20) C(1) . . . . 0.6(6) no

   N(4) C(19) C(20) C(39) . . . . -179.7(3) no

   C(1) N(1) C(4) C(3) . . . . 3.1(4) no

   C(1) N(1) C(4) C(5) . . . . -172.8(3) no

   C(1) C(2) C(3) C(4) . . . . 1.8(4) no

   C(1) C(20) C(19) C(18) . . . . 177.7(3) no

   C(1) C(20) C(39) C(40) . . . . -107.6(4) no

   C(1) C(20) C(39) C(44) . . . . 73.1(4) no

   C(2) C(1) N(1) C(4) . . . . -2.0(4) no

   C(2) C(1) C(20) C(19) . . . . -164.5(3) no

   C(2) C(1) C(20) C(39) . . . . 15.8(5) no

   C(2) C(3) C(4) C(5) . . . . 172.6(3) no

   C(3) C(2) C(1) C(20) . . . . 178.3(3) no

   C(3) C(4) C(5) C(6) . . . . 174.2(3) no

   C(3) C(4) C(5) C(21) . . . . -11.4(5) no

   C(4) N(1) C(1) C(20) . . . . 179.7(3) no

   C(4) C(5) C(6) C(7) . . . . 173.9(3) no

   C(4) C(5) C(21) C(22) . . . . -65.8(4) no

   C(4) C(5) C(21) C(26) . . . . 114.0(3) no

   C(5) C(6) N(2) C(9) . . . . -179.4(3) no

   C(5) C(6) C(7) C(8) . . . . 179.7(3) no

   C(5) C(21) C(22) C(23) . . . . 177.4(3) no

   C(5) C(21) C(26) C(25) . . . . -177.7(3) no

   C(6) N(2) C(9) C(8) . . . . -1.0(4) no

   C(6) N(2) C(9) C(10) . . . . 175.9(3) no

   C(6) C(5) C(21) C(22) . . . . 109.2(4) no

   C(6) C(5) C(21) C(26) . . . . -71.1(4) no

   C(6) C(7) C(8) C(9) . . . . 0.2(4) no

   C(7) C(6) N(2) C(9) . . . . 1.2(4) no

   C(7) C(6) C(5) C(21) . . . . -0.6(5) no

   C(7) C(8) C(9) C(10) . . . . -176.5(3) no

   C(8) C(9) C(10) C(11) . . . . 175.4(3) no

   C(8) C(9) C(10) C(27) . . . . -3.3(5) no

   C(9) C(10) C(11) C(12) . . . . -164.2(4) no

   C(9) C(10) C(27) C(28) . . . . 77.8(5) no

   C(9) C(10) C(27) C(32) . . . . -102.5(4) no

   C(10) C(11) N(3) C(14) . . . . 178.5(3) no

   C(10) C(11) C(12) C(13) . . . . 178.5(4) no

   C(10) C(27) C(28) C(29) . . . . 178.5(4) no

   C(10) C(27) C(32) C(31) . . . . -178.1(4) no

   C(11) N(3) C(14) C(13) . . . . 4.7(4) no

   C(11) N(3) C(14) C(15) . . . . -171.3(3) no

   C(11) C(10) C(27) C(28) . . . . -101.0(4) no

   C(11) C(10) C(27) C(32) . . . . 78.7(5) no

   C(11) C(12) C(13) C(14) . . . . 2.4(4) no

   C(12) C(11) N(3) C(14) . . . . -3.2(4) no

   C(12) C(11) C(10) C(27) . . . . 14.5(6) no

   C(12) C(13) C(14) C(15) . . . . 171.3(4) no

   C(13) C(14) C(15) C(16) . . . . 176.5(4) no

   C(13) C(14) C(15) C(33) . . . . -5.0(6) no

   C(14) C(15) C(16) C(17) . . . . 174.2(4) no

   C(14) C(15) C(33) C(34) . . . . -75.9(5) no

   C(14) C(15) C(33) C(38) . . . . 103.6(4) no

   C(15) C(16) N(4) C(19) . . . . -177.2(3) no

   C(15) C(16) C(17) C(18) . . . . 178.5(4) no

   C(15) C(33) C(34) C(35) . . . . 177.0(4) no

   C(15) C(33) C(38) C(37) . . . . -176.1(4) no

   C(16) N(4) C(19) C(18) . . . . -2.0(4) no

   C(16) N(4) C(19) C(20) . . . . 175.4(3) no

   C(16) C(15) C(33) C(34) . . . . 102.7(4) no

   C(16) C(15) C(33) C(38) . . . . -77.7(4) no

   C(16) C(17) C(18) C(19) . . . . -1.1(4) no

   C(17) C(16) N(4) C(19) . . . . 1.3(4) no

   C(17) C(16) C(15) C(33) . . . . -4.4(5) no

   C(17) C(18) C(19) C(20) . . . . -175.5(4) no

   C(18) C(19) C(20) C(39) . . . . -2.6(5) no

   C(19) C(20) C(39) C(40) . . . . 72.7(4) no

   C(19) C(20) C(39) C(44) . . . . -106.6(4) no

   C(20) C(39) C(40) C(41) . . . . 179.0(3) no

   C(20) C(39) C(44) C(43) . . . . -179.9(3) no

   C(21) C(22) C(23) C(24) . . . . 0.9(6) no

   C(21) C(26) C(25) C(24) . . . . -0.4(5) no

   C(22) C(21) C(26) C(25) . . . . 2.1(5) no

   C(22) C(23) C(24) C(25) . . . . 0.8(6) no

   C(23) C(22) C(21) C(26) . . . . -2.4(5) no

   C(23) C(24) C(25) C(26) . . . . -1.1(5) no

   C(27) C(28) C(29) C(30) . . . . 0.7(7) no

   C(27) C(32) C(31) C(30) . . . . -1.4(7) no

   C(28) C(27) C(32) C(31) . . . . 1.6(6) no

   C(28) C(29) C(30) C(31) . . . . -0.5(7) no

   C(29) C(28) C(27) C(32) . . . . -1.2(6) no

   C(29) C(30) C(31) C(32) . . . . 0.9(7) no

   C(33) C(34) C(35) C(36) . . . . 0.2(6) no

   C(33) C(38) C(37) C(36) . . . . -2.0(6) no

   C(34) C(33) C(38) C(37) . . . . 3.4(6) no

   C(34) C(35) C(36) C(37) . . . . 1.3(7) no

   C(35) C(34) C(33) C(38) . . . . -2.5(6) no

   C(35) C(36) C(37) C(38) . . . . -0.4(7) no

   C(39) C(40) C(41) C(42) . . . . 1.8(6) no

   C(39) C(44) C(43) C(42) . . . . 0.2(6) no

   C(40) C(39) C(44) C(43) . . . . 0.7(5) no

   C(40) C(41) C(42) C(43) . . . . -0.9(6) no

   C(41) C(40) C(39) C(44) . . . . -1.7(5) no

   C(41) C(42) C(43) C(44) . . . . 0.0(6) no

#------------------------------------------------------------------------------

loop_

_geom_bond_atom_site_label_D

_geom_bond_atom_site_label_H

_geom_contact_atom_site_label_A

_geom_bond_distance_DH

_geom_contact_distance_HA

_geom_contact_distance_DA

_geom_angle_DHA

_geom_contact_site_symmetry_A

'O(1)' 'H(35)' 'O(2)' '0.79' '1.85' '2.639(4)' '174.4' '.'

#===END

data_3b (Zn(TPP(CH3)4(THF)1.6(CHCl3)0.4

#------------------------------------------------------------------------------

_audit_creation_date                  '2000-02-19'

_audit_creation_method                'by teXsan v1.8'

_audit_update_record

;

?

;

#------------------------------------------------------------------------------

_publ_requested_journal               ' ENTER JOURNAL NAME HERE'

_publ_requested_category              ' CHOOSE FI FM FO CI CM CO or AD'

_publ_contact_author_name             ' ENTER CONTACT NAME HERE'


_publ_contact_author_address

;

     ENTER ADDRESS

;

_publ_contact_letter

;

      ENTER TEXT OF LETTER

;


_publ_requested_coeditor_name          ?

_publ_contact_author_phone            ' ENTER PHONE NUMBER '

_publ_contact_author_fax              ' ENTER FAX NUMBER '

_publ_contact_author_email            ' ENTER EMAIL ADDRESS '

loop_

_publ_author_name

_publ_author_footnote

_publ_author_address

' FIRST AUTHORS NAME '

;

    FIRST AUTHORS FOOTNOTES

;

;

    FIRST AUTHORS ADDRESS

;


_publ_section_title

;

      ENTER SECTION TITLE

;


_publ_section_title_footnote          ' ENTER ANY FOOTNOTES TO TITLE '


_publ_section_abstract

;

      ENTER ABSTRACT

;


_publ_section_exptl_refinement

;

      ENTER EXPERIMENTAL SECTION

;


_publ_section_comment

;

      ENTER TEXT

;


_publ_section_references

;

      ENTER OTHER REFERENCES


Molecular Structure Corporation. (1996-1998). d*TREK.

Area Detector Software. Version 4.4.

MSC, 3200 Research Forest Drive, The Woodlands, TX 77381, USA.


Molecular Structure Corporation. (1992-1997). teXsan.

Single Crystal Structure Analysis Software. Version 1.8.

MSC, 3200 Research Forest Drive, The Woodlands, TX 77381, USA.


Altomare, A., Burla, M.C., Cammalli, G., Cascarano, M.,

Giacovazzo, C., Guagliardi, A., Moliterni, A.G.G.,

Polidori, G., Spagna, A. (1998). SIR97: a new tool for crystal

structure determination and refinement.  Submitted.

;


_publ_section_acknowledgements

;

      ENTER ACKNOWLEDGEMENTS

;


_publ_section_table_legends

;

      ENTER TABLE LEGENDS

;


_publ_section_figure_captions

;

      ENTER FIGURE CAPTIONS

;

#------------------------------------------------------------------------------

_computing_data_collection            'd*TREK (MSC, 1996-1998)'

_computing_cell_refinement            'd*TREK (MSC, 1996-1998)'

_computing_data_reduction             'd*TREK (MSC, 1996-1998)'

_computing_structure_solution

;

SIR97 (Altomare, et. al. 1998)

;

_computing_structure_refinement       'teXsan (MSC, 1992-1997)'

_computing_publication_material       'teXsan (MSC, 1992-1997)'

#------------------------------------------------------------------------------

_cell_length_a                         13.585(1)

_cell_length_b                         18.182(1)

_cell_length_c                         18.065(2)

_cell_angle_alpha                      90

_cell_angle_beta                       93.274(3)

_cell_angle_gamma                      90

_cell_volume                           4454.9(6)

_cell_formula_units_Z                  4

_cell_measurement_temperature          173.2

_cell_measurement_reflns_used          10171

_cell_measurement_theta_min            2.89

_cell_measurement_theta_max            25.05

#------------------------------------------------------------------------------

_symmetry_cell_setting                 monoclinic

_symmetry_space_group_name_H-M        'P 21/n     '

_symmetry_Int_Tables_number            14

_symmetry_space_group_name_Hall        ?

loop_

_symmetry_equiv_pos_as_xyz

    '   +x,   +y,   +z'

    '1/2-x,1/2+y,1/2-z'

    '   -x,   -y,   -z'

    '1/2+x,1/2-y,1/2+z'

#------------------------------------------------------------------------------


_publ_section_exptl_prep

;

      ENTER EXPERIMENTAL SECTION

;

_exptl_crystal_description            'needle'

_exptl_crystal_colour                 'red'

_exptl_crystal_size_max                0.30

_exptl_crystal_size_mid                0.10

_exptl_crystal_size_min                0.05

_exptl_crystal_density_diffrn          1.421

_exptl_crystal_density_meas            'not measured'

_chemical_formula_weight               953.29

_chemical_formula_analytical           ?

_chemical_formula_sum                  'C57 H44 Cl2 N4 O2 Zn '

_chemical_formula_moiety               '?'

_chemical_formula_structural           ?

_chemical_compound_source              ?

_exptl_crystal_F_000                   1976.00

_exptl_absorpt_coefficient_mu          0.722

_exptl_absorpt_correction_type         multi-scan

_exptl_absorpt_correction_T_max        1.000

_exptl_absorpt_correction_T_min        0.6200

_exptl_special_details

;

Data were collected in 0.50\% oscillations with 58.0 s exposures.

A sweep of data was done using \f oscillations from 0.0 to 190.0\%

at \c = -90\%

and a second sweep was performed using \w oscillations between

-19.0 and 23.0\% at \c = 90.0\%.

The crystal-to-detector distance was 40.50 mm.

The detector swing angle was -5.0\%.

The absorption correction is based on a three-dimensional analysis

of symmetry-equivalent data and is performed along with batch scaling

in a single step. The resulting transmission factors, therefore,

include contributions from absorption, crystal decay, and

detectable variations in beam intensity.

;

#------------------------------------------------------------------------------

_diffrn_special_details

;

   ?

;

_diffrn_ambient_temperature            173.2

_diffrn_radiation_wavelength           0.7107

_diffrn_radiation_type                 'Mo K\a'

_diffrn_radiation_source              'X-ray tube'

_diffrn_radiation_monochromator        graphite

_diffrn_radiation_detector            'CCD'

_diffrn_measurement_device_type       'Rigaku/ADSC CCD'

_diffrn_detector_area_resol_mean      11.76

_diffrn_measurement_method            'area detector'

_diffrn_standards_number              0

_diffrn_standards_interval_count      0

_diffrn_standards_decay_%             0.00

loop_

_diffrn_standard_refln_index_h

_diffrn_standard_refln_index_k

_diffrn_standard_refln_index_l

   ? ? ?


_diffrn_reflns_number                  32215

_reflns_number_total                   7736

_reflns_number_gt                      2621

_reflns_threshold_expression            I>3.00\s(I)

_diffrn_reflns_av_R_equivalents        0.15461

_diffrn_reflns_av_sigmaI/netI          0.300

_diffrn_reflns_theta_full             ?

_diffrn_measured_fraction_theta_max   ?

_diffrn_measured_fraction_theta_full  ?

_diffrn_reflns_limit_h_min             -16

_diffrn_reflns_limit_h_max             14

_diffrn_reflns_limit_k_min             -21

_diffrn_reflns_limit_k_max             20

_diffrn_reflns_limit_l_min             -20

_diffrn_reflns_limit_l_max             20

_diffrn_reflns_theta_min               2.89

_diffrn_reflns_theta_max               25.05

_diffrn_reflns_reduction_process      'Lp corrections applied'

_diffrn_orient_matrix_UB_11            0.00000

_diffrn_orient_matrix_UB_12            0.00000

_diffrn_orient_matrix_UB_13            0.00000

_diffrn_orient_matrix_UB_21            0.00000

_diffrn_orient_matrix_UB_22            0.00000

_diffrn_orient_matrix_UB_23            0.00000

_diffrn_orient_matrix_UB_31            0.00000

_diffrn_orient_matrix_UB_32            0.00000

_diffrn_orient_matrix_UB_33            0.00000

#------------------------------------------------------------------------------

loop_

_atom_type_symbol

_atom_type_oxidation_number

_atom_type_number_in_cell

_atom_type_scat_dispersion_real

_atom_type_scat_dispersion_imag

_atom_type_scat_source

    C  0   228 0.002 0.002

;International Tables for Crystallography

(1992, Vol. C, Tables 4.2.6.8 and 6.1.1.1)

;

    H  0   176 0.000 0.000

;International Tables for Crystallography

(1992, Vol. C, Table 6.1.1.2)

;

    N  0    16 0.004 0.003

;International Tables for Crystallography

(1992, Vol. C, Tables 4.2.6.8 and 6.1.1.1)

;

    Zn 0     4 0.222 1.431

;International Tables for Crystallography

(1992, Vol. C, Tables 4.2.6.8 and 6.1.1.1)

;

    O  0     8 0.008 0.006

;International Tables for Crystallography

(1992, Vol. C, Tables 4.2.6.8 and 6.1.1.1)

;

    Cl 0     8 0.132 0.159

;International Tables for Crystallography

(1992, Vol. C, Tables 4.2.6.8 and 6.1.1.1)

;

#------------------------------------------------------------------------------

loop_

_atom_site_label

_atom_site_fract_x

_atom_site_fract_y

_atom_site_fract_z

_atom_site_U_iso_or_equiv

_atom_site_occupancy

_atom_site_refinement_flags

_atom_site_adp_type

_atom_site_calc_flag

_atom_site_calc_attached_atom

Zn(1) 0.26814(6) 0.12829(4) 0.87152(5) 0.0152(2) 1.000 . Uani d ?

Cl(1) 0.1908(4) 0.0949(3) 0.3698(3) 0.075(1) 0.550 . Uiso d ?

Cl(2) 0.2594(4) 0.2291(4) 0.4362(4) 0.056(2) 0.360 . Uiso d ?

Cl(3) 0.3793(7) 0.1529(5) 0.3399(5) 0.087(3) 0.360 . Uiso d ?

O(1) 0.2693(4) 0.2483(2) 0.8707(3) 0.033(1) 1.000 . Uani d ?

O(2) 0.2853(7) 0.0906(5) 0.3693(6) 0.047(3) 0.550 . Uiso d ?

N(1) 0.2283(3) 0.1139(3) 0.7590(3) 0.016(2) 1.000 . Uani d ?

N(2) 0.1245(3) 0.1180(3) 0.8938(3) 0.014(1) 1.000 . Uani d ?

N(3) 0.3075(3) 0.1145(3) 0.9843(3) 0.015(1) 1.000 . Uani d ?

N(4) 0.4112(3) 0.1154(3) 0.8493(3) 0.016(1) 1.000 . Uani d ?

C(1) 0.2891(4) 0.1004(3) 0.7035(3) 0.014(2) 1.000 . Uani d ?

C(2) 0.2344(5) 0.0817(3) 0.6349(4) 0.017(2) 1.000 . Uani d ?

C(3) 0.1361(4) 0.0900(4) 0.6489(4) 0.017(2) 1.000 . Uani d ?

C(4) 0.1337(4) 0.1099(3) 0.7262(3) 0.015(2) 1.000 . Uani d ?

C(5) 0.0496(4) 0.1255(4) 0.7664(3) 0.015(2) 1.000 . Uani d ?

C(6) 0.0462(4) 0.1301(4) 0.8430(3) 0.017(2) 1.000 . Uani d ?

C(7) -0.0424(4) 0.1432(4) 0.8827(3) 0.019(2) 1.000 . Uani d ?

C(8) -0.0170(4) 0.1370(4) 0.9552(3) 0.019(2) 1.000 . Uani d ?

C(9) 0.0874(4) 0.1209(4) 0.9634(3) 0.016(2) 1.000 . Uani d ?

C(10) 0.1414(4) 0.1099(3) 1.0303(4) 0.017(2) 1.000 . Uani d ?

C(11) 0.2442(4) 0.1002(3) 1.0393(3) 0.014(2) 1.000 . Uani d ?

C(12) 0.3009(5) 0.0793(3) 1.1077(4) 0.019(2) 1.000 . Uani d ?

C(13) 0.3981(4) 0.0868(3) 1.0935(3) 0.016(2) 1.000 . Uani d ?

C(14) 0.4020(4) 0.1092(3) 1.0166(3) 0.014(2) 1.000 . Uani d ?

C(15) 0.4874(4) 0.1221(3) 0.9763(3) 0.015(2) 1.000 . Uani d ?

C(16) 0.4899(4) 0.1239(4) 0.9005(3) 0.016(2) 1.000 . Uani d ?

C(17) 0.5788(4) 0.1320(4) 0.8612(3) 0.020(2) 1.000 . Uani d ?

C(18) 0.5542(4) 0.1274(4) 0.7874(3) 0.021(2) 1.000 . Uani d ?

C(19) 0.4466(4) 0.1167(4) 0.7800(3) 0.017(2) 1.000 . Uani d ?

C(20) 0.3937(4) 0.1068(3) 0.7126(4) 0.018(2) 1.000 . Uani d ?

C(21) 0.2715(5) 0.0547(4) 0.5623(4) 0.028(2) 1.000 . Uani d ?

C(22) 0.0453(5) 0.0719(4) 0.5890(4) 0.028(2) 1.000 . Uani d ?

C(23) 0.2627(5) 0.0461(4) 1.1759(4) 0.032(2) 1.000 . Uani d ?

C(24) 0.4835(5) 0.0682(4) 1.1486(4) 0.023(2) 1.000 . Uani d ?

C(25) -0.0472(4) 0.1395(4) 0.7221(4) 0.016(2) 1.000 . Uani d ?

C(26) -0.0646(5) 0.2057(4) 0.6864(4) 0.026(2) 1.000 . Uani d ?

C(27) -0.1516(5) 0.2175(4) 0.6438(4) 0.034(2) 1.000 . Uani d ?

C(28) -0.2224(5) 0.1637(4) 0.6391(4) 0.033(2) 1.000 . Uani d ?

C(29) -0.2081(5) 0.0976(4) 0.6764(4) 0.033(2) 1.000 . Uani d ?

C(30) -0.1208(5) 0.0856(4) 0.7180(4) 0.027(2) 1.000 . Uani d ?

C(31) 0.0830(4) 0.1127(3) 1.0981(3) 0.017(2) 1.000 . Uani d ?

C(32) 0.0163(5) 0.0578(4) 1.1143(4) 0.021(2) 1.000 . Uani d ?

C(33) -0.0350(4) 0.0622(4) 1.1802(4) 0.023(2) 1.000 . Uani d ?

C(34) -0.0197(5) 0.1210(4) 1.2280(4) 0.029(2) 1.000 . Uiso d ?

C(35) 0.0428(5) 0.1773(4) 1.2098(4) 0.029(2) 1.000 . Uani d ?

C(36) 0.0942(5) 0.1732(4) 1.1460(4) 0.026(2) 1.000 . Uani d ?

C(37) 0.5828(4) 0.1344(4) 1.0205(3) 0.015(2) 1.000 . Uani d ?

C(38) 0.5989(4) 0.1982(4) 1.0577(4) 0.022(2) 1.000 . Uani d ?

C(39) 0.6881(5) 0.2116(4) 1.0991(4) 0.031(2) 1.000 . Uani d ?

C(40) 0.7608(4) 0.1582(4) 1.1019(4) 0.029(2) 1.000 . Uani d ?

C(41) 0.7451(5) 0.0938(4) 1.0639(4) 0.029(2) 1.000 . Uani d ?

C(42) 0.6576(4) 0.0812(4) 1.0218(4) 0.022(2) 1.000 . Uani d ?

C(43) 0.4534(4) 0.1069(3) 0.6454(3) 0.015(2) 1.000 . Uani d ?

C(44) 0.5154(4) 0.0479(4) 0.6294(4) 0.021(2) 1.000 . Uani d ?

C(45) 0.5665(4) 0.0475(4) 0.5670(4) 0.026(2) 1.000 . Uani d ?

C(46) 0.5634(5) 0.1056(4) 0.5197(4) 0.029(2) 1.000 . Uani d ?

C(47) 0.5048(5) 0.1660(4) 0.5339(4) 0.028(2) 1.000 . Uani d ?

C(48) 0.4505(4) 0.1663(4) 0.5974(4) 0.022(2) 1.000 . Uani d ?

C(50A) 0.3493(8) 0.2901(6) 0.9009(7) 0.007(3) 0.500 . Uiso d ?

C(51) 0.3117(6) 0.3693(5) 0.9017(5) 0.045(2) 1.000 . Uani d ?

C(52) 0.2363(6) 0.3695(5) 0.8364(5) 0.047(2) 1.000 . Uani d ?

C(53A) 0.226(1) 0.292(1) 0.813(1) 0.050(5) 0.500 . Uiso d ?

C(55) 0.167(1) 0.1739(9) 0.4077(9) 0.047(4) 0.550 . Uiso d ?

C(56) 0.256(2) 0.220(1) 0.383(2) 0.090(7) 0.550 . Uiso d ?

C(57) 0.321(2) 0.162(1) 0.360(1) 0.060(5) 0.550 . Uiso d ?

C(58) 0.250(2) 0.185(2) 0.356(2) 0.069(7) 0.360 . Uiso d ?

C(50B) 0.314(2) 0.288(2) 0.927(2) 0.098(7) 0.500 . Uiso d ?

C(53B) 0.186(1) 0.2938(8) 0.8413(9) 0.031(4) 0.500 . Uiso d ?

H(1) -0.1095 0.1539 0.8602 0.024 1.000 . Uiso c ?

H(2) -0.0601 0.1427 0.9967 0.025 1.000 . Uiso c ?

H(3) 0.6444 0.1382 0.8842 0.026 1.000 . Uiso c ?

H(4) 0.5996 0.1312 0.7475 0.025 1.000 . Uiso c ?

H(5) 0.2447 0.0056 0.5512 0.033 1.000 . Uiso c ?

H(6) 0.2489 0.0887 0.5224 0.033 1.000 . Uiso c ?

H(7) 0.3431 0.0531 0.5660 0.033 1.000 . Uiso c ?

H(8) -0.0172 0.0814 0.6108 0.032 1.000 . Uiso c ?

H(9) 0.0508 0.1031 0.5446 0.032 1.000 . Uiso c ?

H(10) 0.0487 0.0200 0.5738 0.032 1.000 . Uiso c ?

H(11) 0.2849 0.0734 1.2191 0.044 1.000 . Uiso c ?

H(12) 0.1887 0.0470 1.1711 0.044 1.000 . Uiso c ?

H(13) 0.2829 -0.0057 1.1802 0.044 1.000 . Uiso c ?

H(14) 0.4810 0.0165 1.1610 0.029 1.000 . Uiso c ?

H(15) 0.5462 0.0784 1.1243 0.029 1.000 . Uiso c ?

H(16) 0.4801 0.0989 1.1919 0.029 1.000 . Uiso c ?

H(17) -0.0151 0.2453 0.6899 0.031 1.000 . Uiso c ?

H(18) -0.1629 0.2632 0.6160 0.042 1.000 . Uiso c ?

H(19) -0.2822 0.1704 0.6087 0.037 1.000 . Uiso c ?

H(20) -0.2599 0.0593 0.6739 0.039 1.000 . Uiso c ?

H(21) -0.1120 0.0406 0.7462 0.032 1.000 . Uiso c ?

H(22) 0.0055 0.0173 1.0779 0.025 1.000 . Uiso c ?

H(23) -0.0805 0.0219 1.1925 0.026 1.000 . Uiso c ?

H(24) -0.0540 0.1227 1.2732 0.036 1.000 . Uiso c ?

H(25) 0.0511 0.2203 1.2419 0.036 1.000 . Uiso c ?

H(26) 0.1406 0.2128 1.1353 0.026 1.000 . Uiso c ?

H(27) 0.5465 0.2348 1.0552 0.029 1.000 . Uiso c ?

H(28) 0.6970 0.2588 1.1248 0.037 1.000 . Uiso c ?

H(29) 0.8236 0.1678 1.1297 0.040 1.000 . Uiso c ?

H(30) 0.7964 0.0565 1.0650 0.035 1.000 . Uiso c ?

H(31) 0.6470 0.0353 0.9943 0.027 1.000 . Uiso c ?

H(32) 0.5229 0.0059 0.6627 0.025 1.000 . Uiso c ?

H(33) 0.6075 0.0054 0.5560 0.034 1.000 . Uiso c ?

H(34) 0.6006 0.1051 0.4757 0.044 1.000 . Uiso c ?

H(35) 0.5012 0.2072 0.4996 0.031 1.000 . Uiso c ?

H(36) 0.4111 0.2089 0.6081 0.032 1.000 . Uiso c ?

H(37) 0.3735 0.2721 0.9473 0.023 1.000 . Uiso c ?

H(38) 0.4043 0.2866 0.8644 0.023 1.000 . Uiso c ?

H(39) 0.2828 0.3801 0.9498 0.056 1.000 . Uiso c ?

H(40) 0.3665 0.4059 0.8967 0.056 1.000 . Uiso c ?

H(41) 0.1725 0.3861 0.8522 0.055 1.000 . Uiso c ?

H(42) 0.2582 0.4042 0.7978 0.055 1.000 . Uiso c ?

H(43) 0.2754 0.2826 0.7655 0.067 1.000 . Uiso c ?

H(44) 0.1656 0.2747 0.7921 0.067 1.000 . Uiso c ?


loop_

_atom_site_aniso_label

_atom_site_aniso_U_11

_atom_site_aniso_U_22

_atom_site_aniso_U_33

_atom_site_aniso_U_12

_atom_site_aniso_U_13

_atom_site_aniso_U_23

   Zn(1)  0.0078(3)   0.0206(4)   0.0171(4)   -0.0001(4)  0.0009(2)   -0.0004(5)

   O(1)   0.031(2)    0.023(2)    0.043(3)    0.003(3)    -0.012(2)   -0.001(3)

   N(1)   0.010(3)    0.022(3)    0.018(3)    -0.004(2)   0.003(2)    0.003(2)

   N(2)   0.009(2)    0.017(3)    0.014(3)    -0.001(2)   -0.002(2)   -0.001(2)

   N(3)   0.005(2)    0.017(3)    0.024(3)    -0.001(2)   0.000(2)    -0.001(2)

   N(4)   0.016(3)    0.017(3)    0.014(3)    0.000(2)    0.000(2)    -0.002(2)

   C(1)   0.011(3)    0.019(4)    0.013(3)    0.002(2)    0.002(3)    0.002(3)

   C(2)   0.013(3)    0.020(3)    0.017(4)    0.002(3)    -0.001(2)   -0.005(4)

   C(3)   0.014(3)    0.017(4)    0.019(4)    0.001(3)    -0.001(3)   0.003(3)

   C(4)   0.012(3)    0.021(4)    0.013(3)    -0.003(2)   -0.003(3)   0.004(3)

   C(5)   0.012(3)    0.013(3)    0.019(3)    -0.005(3)   -0.002(2)   0.004(3)

   C(6)   0.013(3)    0.019(3)    0.018(3)    0.000(3)    0.000(3)    -0.003(3)

   C(7)   0.009(3)    0.028(4)    0.019(4)    -0.001(3)   -0.002(3)   -0.003(3)

   C(8)   0.009(3)    0.028(4)    0.023(4)    -0.003(3)   0.007(3)    0.001(3)

   C(9)   0.015(3)    0.017(4)    0.016(3)    0.002(3)    0.003(3)    0.001(3)

   C(10)  0.012(3)    0.016(4)    0.023(4)    -0.001(2)   0.004(3)    0.004(3)

   C(11)  0.012(3)    0.012(3)    0.019(4)    0.000(2)    0.002(3)    0.001(3)

   C(12)  0.021(3)    0.022(4)    0.015(4)    0.000(3)    0.007(3)    -0.001(3)

   C(13)  0.017(3)    0.015(4)    0.016(4)    -0.004(3)   0.000(3)    -0.002(3)

   C(14)  0.015(3)    0.014(4)    0.014(3)    0.002(2)    -0.004(3)   -0.005(3)

   C(15)  0.010(3)    0.013(3)    0.023(4)    0.001(3)    -0.003(2)   0.001(3)

   C(16)  0.013(3)    0.018(3)    0.017(3)    -0.002(3)   -0.004(3)   -0.004(3)

   C(17)  0.006(3)    0.026(4)    0.028(4)    -0.002(3)   -0.001(3)   -0.008(3)

   C(18)  0.010(3)    0.032(4)    0.022(4)    -0.001(3)   0.002(3)    -0.004(4)

   C(19)  0.008(3)    0.026(4)    0.016(3)    0.003(3)    0.004(2)    0.003(3)

   C(20)  0.015(3)    0.020(4)    0.018(4)    0.004(3)    0.000(3)    0.001(3)

   C(21)  0.019(4)    0.038(5)    0.027(4)    0.003(3)    0.005(3)    0.001(3)

   C(22)  0.022(4)    0.024(4)    0.041(5)    0.009(3)    0.024(3)    0.003(4)

   C(23)  0.025(4)    0.047(5)    0.025(4)    0.011(3)    0.007(3)    0.007(4)

   C(24)  0.016(4)    0.021(4)    0.034(4)    -0.001(3)   0.003(3)    0.010(3)

   C(25)  0.009(3)    0.023(4)    0.016(4)    0.002(3)    -0.002(3)   0.003(3)

   C(26)  0.020(4)    0.022(4)    0.034(4)    -0.004(3)   -0.008(3)   0.005(3)

   C(27)  0.035(4)    0.024(4)    0.042(5)    0.001(3)    -0.017(4)   0.007(4)

   C(28)  0.019(4)    0.036(5)    0.043(5)    0.006(3)    -0.013(3)   -0.004(4)

   C(29)  0.017(4)    0.037(5)    0.046(5)    -0.005(3)   -0.004(3)   0.008(4)

   C(30)  0.017(4)    0.029(4)    0.033(5)    -0.006(3)   -0.007(3)   0.017(4)

   C(31)  0.008(3)    0.023(4)    0.020(4)    0.005(3)    -0.001(3)   0.002(3)

   C(32)  0.013(3)    0.023(4)    0.026(4)    -0.003(3)   0.002(3)    0.001(3)

   C(33)  0.013(3)    0.030(4)    0.026(4)    0.002(3)    0.003(3)    0.014(3)

   C(35)  0.031(4)    0.032(5)    0.024(4)    0.004(3)    0.000(3)    -0.007(3)

   C(36)  0.021(4)    0.026(4)    0.030(4)    -0.003(3)   0.005(3)    -0.007(3)

   C(37)  0.006(3)    0.020(4)    0.020(3)    -0.004(3)   0.001(2)    -0.002(3)

   C(38)  0.017(3)    0.021(4)    0.028(4)    0.003(3)    -0.002(3)   -0.003(3)

   C(39)  0.027(4)    0.023(4)    0.042(5)    -0.006(3)   -0.007(3)   -0.006(4)

   C(40)  0.010(3)    0.036(4)    0.040(5)    -0.001(3)   -0.014(3)   -0.003(4)

   C(41)  0.019(4)    0.021(4)    0.044(5)    0.006(3)    -0.010(3)   0.000(4)

   C(42)  0.020(4)    0.014(4)    0.033(4)    0.002(3)    -0.005(3)   -0.002(3)

   C(43)  0.010(3)    0.021(4)    0.014(3)    -0.001(2)   0.002(3)    -0.002(3)

   C(44)  0.019(3)    0.025(4)    0.019(4)    0.004(3)    -0.002(3)   -0.002(3)

   C(45)  0.012(3)    0.038(5)    0.029(4)    0.002(3)    0.000(3)    -0.006(4)

   C(46)  0.014(3)    0.063(6)    0.012(4)    -0.004(3)   0.011(3)    -0.005(4)

   C(47)  0.025(4)    0.036(5)    0.023(4)    -0.011(3)   0.001(3)    0.016(4)

   C(48)  0.017(3)    0.024(4)    0.024(4)    0.003(3)    0.000(3)    -0.002(3)

   C(51)  0.061(5)    0.024(4)    0.053(5)    -0.009(5)   0.021(4)    -0.007(5)

   C(52)  0.046(5)    0.026(4)    0.070(6)    0.005(4)    0.013(4)    0.010(5)

#------------------------------------------------------------------------------

_refine_special_details

;

   ?

;

_refine_ls_structure_factor_coef       Fsqd

_refine_ls_matrix_type                 full

_refine_ls_weighting_scheme            sigma

_refine_ls_weighting_details           'w = 1/[\s^2^(Fo^2^)]'

_refine_ls_hydrogen_treatment          noref

_refine_ls_extinction_method           none

_refine_ls_extinction_coef             ?

_refine_ls_abs_structure_details       ?

_refine_ls_abs_structure_Flack         ?

_refine_ls_number_reflns               7452

_refine_ls_number_parameters           548

_refine_ls_number_restraints           0

_refine_ls_number_constraints          0

_refine_ls_R_factor_all                0.1298

_refine_ls_R_factor_gt                 0.051

_refine_ls_wR_factor_all               0.1574

_refine_ls_wR_factor_ref               0.064

_refine_ls_goodness_of_fit_all         0.817

_refine_ls_goodness_of_fit_ref         0.817

_refine_ls_shift/su_max                0.0063

_refine_ls_shift/su_mean               0.0015

_refine_diff_density_min               -1.37

_refine_diff_density_max               1.45

#------------------------------------------------------------------------------

_geom_special_details

;

   ?

;

loop_

_geom_bond_atom_site_label_1

_geom_bond_atom_site_label_2

_geom_bond_distance

_geom_bond_site_symmetry_1

_geom_bond_site_symmetry_2

_geom_bond_publ_flag

   Zn(1) O(1) 2.182(4) . . yes

   Zn(1) N(1) 2.091(5) . . yes

   Zn(1) N(2) 2.024(5) . . yes

   Zn(1) N(3) 2.091(5) . . yes

   Zn(1) N(4) 2.021(5) . . yes

   Cl(1) O(2) 1.29(1) . . yes

   Cl(1) C(55) 1.63(2) . . yes

   Cl(1) C(58) 1.84(3) . . yes

   Cl(2) C(55) 1.66(2) . . yes

   Cl(2) C(56) 0.97(3) . . yes

   Cl(2) C(57) 2.05(2) . . yes

   Cl(2) C(58) 1.65(3) . . yes

   Cl(3) O(2) 1.81(1) . . yes

   Cl(3) C(57) 0.91(2) . . yes

   Cl(3) C(58) 1.89(3) . . yes

   O(1) C(50A) 1.41(1) . . yes

   O(1) C(53A) 1.41(2) . . yes

   O(1) C(50B) 1.36(3) . . yes

   O(1) C(53B) 1.48(2) . . yes

   O(2) C(57) 1.40(2) . . yes

   O(2) C(58) 1.79(4) . . yes

   N(1) C(1) 1.356(8) . . yes

   N(1) C(4) 1.385(7) . . yes

   N(2) C(6) 1.381(7) . . yes

   N(2) C(9) 1.383(7) . . yes

   N(3) C(11) 1.374(7) . . yes

   N(3) C(14) 1.383(7) . . yes

   N(4) C(16) 1.380(7) . . yes

   N(4) C(19) 1.367(7) . . yes

   C(1) C(2) 1.450(9) . . yes

   C(1) C(20) 1.426(8) . . yes

   C(2) C(3) 1.381(9) . . yes

   C(2) C(21) 1.51(1) . . yes

   C(3) C(4) 1.445(9) . . yes

   C(3) C(22) 1.627(9) . . yes

   C(4) C(5) 1.417(8) . . yes

   C(5) C(6) 1.391(8) . . yes

   C(5) C(25) 1.520(8) . . yes

   C(6) C(7) 1.456(8) . . yes

   C(7) C(8) 1.341(8) . . yes

   C(7) H(1) 1.00 . . no

   C(8) C(9) 1.447(8) . . yes

   C(8) H(2) 0.98 . . no

   C(9) C(10) 1.391(8) . . yes

   C(10) C(11) 1.409(8) . . yes

   C(10) C(31) 1.497(9) . . yes

   C(11) C(12) 1.469(9) . . yes

   C(12) C(13) 1.367(9) . . yes

   C(12) C(23) 1.491(9) . . yes

   C(13) C(14) 1.452(8) . . yes

   C(13) C(24) 1.521(9) . . yes

   C(14) C(15) 1.424(8) . . yes

   C(15) C(16) 1.372(8) . . yes

   C(15) C(37) 1.501(7) . . yes

   C(16) C(17) 1.443(8) . . yes

   C(17) C(18) 1.358(8) . . yes

   C(17) H(3) 0.97 . . no

   C(18) C(19) 1.473(8) . . yes

   C(18) H(4) 0.98 . . no

   C(19) C(20) 1.390(8) . . yes

   C(20) C(43) 1.498(9) . . yes

   C(21) H(5) 0.98 . . no

   C(21) H(6) 0.99 . . no

   C(21) H(7) 0.97 . . no

   C(22) H(8) 0.97 . . no

   C(22) H(9) 0.99 . . no

   C(22) H(10) 0.98 . . no

   C(23) H(11) 0.96 . . no

   C(23) H(12) 1.00 . . no

   C(23) H(13) 0.98 . . no

   C(24) H(14) 0.97 . . no

   C(24) H(15) 1.00 . . no

   C(24) H(16) 0.96 . . no

   C(25) C(26) 1.379(9) . . yes

   C(25) C(30) 1.400(9) . . yes

   C(26) C(27) 1.388(9) . . yes

   C(26) H(17) 0.99 . . no

   C(27) C(28) 1.37(1) . . yes

   C(27) H(18) 0.98 . . no

   C(28) C(29) 1.39(1) . . yes

   C(28) H(19) 0.96 . . no

   C(29) C(30) 1.385(9) . . yes

   C(29) H(20) 0.99 . . no

   C(30) H(21) 0.97 . . no

   C(31) C(32) 1.391(8) . . yes

   C(31) C(36) 1.403(9) . . yes

   C(32) C(33) 1.416(9) . . yes

   C(32) H(22) 0.99 . . no

   C(33) C(34) 1.38(1) . . yes

   C(33) H(23) 0.99 . . no

   C(34) C(35) 1.38(1) . . yes

   C(34) H(24) 0.96 . . no

   C(35) C(36) 1.383(9) . . yes

   C(35) H(25) 0.98 . . no

   C(36) H(26) 0.98 . . no

   C(37) C(38) 1.351(9) . . yes

   C(37) C(42) 1.402(9) . . yes

   C(38) C(39) 1.410(9) . . yes

   C(38) H(27) 0.97 . . no

   C(39) C(40) 1.384(9) . . yes

   C(39) H(28) 0.98 . . no

   C(40) C(41) 1.368(9) . . yes

   C(40) H(29) 0.98 . . no

   C(41) C(42) 1.394(9) . . yes

   C(41) H(30) 0.97 . . no

   C(42) H(31) 0.98 . . no

   C(43) C(44) 1.405(8) . . yes

   C(43) C(48) 1.384(9) . . yes

   C(44) C(45) 1.358(9) . . yes

   C(44) H(32) 0.97 . . no

   C(45) C(46) 1.36(1) . . yes

   C(45) H(33) 0.97 . . no

   C(46) C(47) 1.39(1) . . yes

   C(46) H(34) 0.97 . . no

   C(47) C(48) 1.400(9) . . yes

   C(47) H(35) 0.97 . . no

   C(48) H(36) 0.97 . . no

   C(50A) C(51) 1.53(1) . . yes

   C(50A) C(50B) 0.69(3) . . yes

   C(50A) H(37) 0.94 . . no

   C(50A) H(38) 1.03 . . no

   C(51) C(52) 1.52(1) . . yes

   C(51) C(50B) 1.55(3) . . yes

   C(51) H(39) 0.99 . . no

   C(51) H(40) 1.01 . . no

   C(52) C(53A) 1.48(2) . . yes

   C(52) C(53B) 1.54(2) . . yes

   C(52) H(41) 0.98 . . no

   C(52) H(42) 1.00 . . no

   C(53A) C(53B) 0.78(2) . . yes

   C(53A) H(43) 1.13 . . no

   C(53A) H(44) 0.94 . . no

   C(55) C(56) 1.56(3) . . yes

   C(55) C(58) 1.51(3) . . yes

   C(56) C(57) 1.45(3) . . yes

   C(56) C(58) 0.81(3) . . yes

   C(57) C(58) 1.04(3) . . yes

   C(50B) H(37) 0.92 . . no

   C(53B) H(44) 0.98 . . no

#------------------------------------------------------------------------------

loop_

_geom_angle_atom_site_label_1

_geom_angle_atom_site_label_2

_geom_angle_atom_site_label_3

_geom_angle

_geom_angle_site_symmetry_1

_geom_angle_site_symmetry_2

_geom_angle_site_symmetry_3

_geom_angle_publ_flag

   O(1) Zn(1)  N(1) 96.9(2) . . . yes

   O(1) Zn(1)  N(2) 95.8(2) . . . yes

   O(1) Zn(1)  N(3) 97.2(2) . . . yes

   O(1) Zn(1)  N(4) 96.1(2) . . . yes

   N(1) Zn(1)  N(2) 89.0(2) . . . yes

   N(1) Zn(1)  N(3) 165.9(2) . . . yes

   N(1) Zn(1)  N(4) 89.5(2) . . . yes

   N(2) Zn(1)  N(3) 89.5(2) . . . yes

   N(2) Zn(1)  N(4) 168.1(2) . . . yes

   N(3) Zn(1)  N(4) 89.1(2) . . . yes

   O(2) Cl(1)  C(55) 106.1(8) . . . yes

   O(2) Cl(1)  C(58) 67(1) . . . yes

   C(55) Cl(1)  C(58) 51(1) . . . yes

   C(55) Cl(2)  C(56) 67(2) . . . yes

   C(55) Cl(2)  C(57) 76.2(8) . . . yes

   C(55) Cl(2)  C(58) 54(1) . . . yes

   C(56) Cl(2)  C(57) 40(2) . . . yes

   C(56) Cl(2)  C(58) 20(2) . . . yes

   C(57) Cl(2)  C(58) 30(1) . . . yes

   O(2) Cl(3)  C(57) 49(1) . . . yes

   O(2) Cl(3)  C(58) 58(1) . . . yes

   C(57) Cl(3)  C(58) 15(2) . . . yes

   Zn(1) O(1)  C(50A) 122.8(5) . . . yes

   Zn(1) O(1)  C(53A) 124.5(8) . . . yes

   Zn(1) O(1)  C(50B) 122(1) . . . yes

   Zn(1) O(1)  C(53B) 123.8(6) . . . yes

   C(50A) O(1)  C(53A) 105(1) . . . yes

   C(50A) O(1)  C(50B) 29(1) . . . yes

   C(50A) O(1)  C(53B) 113.3(7) . . . yes

   C(53A) O(1)  C(50B) 114(1) . . . yes

   C(53A) O(1)  C(53B) 31.1(8) . . . yes

   C(50B) O(1)  C(53B) 106(1) . . . yes

   Cl(1) O(2)  Cl(3) 133.2(8) . . . yes

   Cl(1) O(2)  C(57) 107(1) . . . yes

   Cl(1) O(2)  C(58) 72(1) . . . yes

   Cl(3) O(2)  C(57) 29.5(8) . . . yes

   Cl(3) O(2)  C(58) 63(1) . . . yes

   C(57) O(2)  C(58) 36(1) . . . yes

   Zn(1) N(1)  C(1) 127.3(4) . . . yes

   Zn(1) N(1)  C(4) 127.2(4) . . . yes

   C(1) N(1)  C(4) 105.3(5) . . . yes

   Zn(1) N(2)  C(6) 124.6(4) . . . yes

   Zn(1) N(2)  C(9) 125.7(4) . . . yes

   C(6) N(2)  C(9) 107.0(5) . . . yes

   Zn(1) N(3)  C(11) 126.2(4) . . . yes

   Zn(1) N(3)  C(14) 126.8(4) . . . yes

   C(11) N(3)  C(14) 106.6(5) . . . yes

   Zn(1) N(4)  C(16) 124.8(4) . . . yes

   Zn(1) N(4)  C(19) 124.9(4) . . . yes

   C(16) N(4)  C(19) 108.2(5) . . . yes

   N(1) C(1)  C(2) 111.8(5) . . . yes

   N(1) C(1)  C(20) 123.0(6) . . . yes

   C(2) C(1)  C(20) 125.2(6) . . . yes

   C(1) C(2)  C(3) 105.7(6) . . . yes

   C(1) C(2)  C(21) 129.6(6) . . . yes

   C(3) C(2)  C(21) 124.7(6) . . . yes

   C(2) C(3)  C(4) 106.3(5) . . . yes

   C(2) C(3)  C(22) 124.0(6) . . . yes

   C(4) C(3)  C(22) 129.4(5) . . . yes

   N(1) C(4)  C(3) 110.8(5) . . . yes

   N(1) C(4)  C(5) 121.8(5) . . . yes

   C(3) C(4)  C(5) 127.5(5) . . . yes

   C(4) C(5)  C(6) 126.5(5) . . . yes

   C(4) C(5)  C(25) 117.6(5) . . . yes

   C(6) C(5)  C(25) 115.9(5) . . . yes

   N(2) C(6)  C(5) 125.7(5) . . . yes

   N(2) C(6)  C(7) 109.0(5) . . . yes

   C(5) C(6)  C(7) 125.1(5) . . . yes

   C(6) C(7)  C(8) 107.0(5) . . . yes

   C(6) C(7)  H(1) 126.6 . . . no

   C(8) C(7)  H(1) 126.4 . . . no

   C(7) C(8)  C(9) 108.3(5) . . . yes

   C(7) C(8)  H(2) 127.2 . . . no

   C(9) C(8)  H(2) 124.5 . . . no

   N(2) C(9)  C(8) 108.7(5) . . . yes

   N(2) C(9)  C(10) 125.7(5) . . . yes

   C(8) C(9)  C(10) 125.7(5) . . . yes

   C(9) C(10)  C(11) 126.0(6) . . . yes

   C(9) C(10)  C(31) 115.3(5) . . . yes

   C(11) C(10)  C(31) 118.5(6) . . . yes

   N(3) C(11)  C(10) 123.4(6) . . . yes

   N(3) C(11)  C(12) 109.8(5) . . . yes

   C(10) C(11)  C(12) 126.7(6) . . . yes

   C(11) C(12)  C(13) 106.4(6) . . . yes

   C(11) C(12)  C(23) 127.6(6) . . . yes

   C(13) C(12)  C(23) 125.5(6) . . . yes

   C(12) C(13)  C(14) 107.2(5) . . . yes

   C(12) C(13)  C(24) 124.3(6) . . . yes

   C(14) C(13)  C(24) 128.3(5) . . . yes

   N(3) C(14)  C(13) 109.9(5) . . . yes

   N(3) C(14)  C(15) 122.4(5) . . . yes

   C(13) C(14)  C(15) 127.7(5) . . . yes

   C(14) C(15)  C(16) 125.6(5) . . . yes

   C(14) C(15)  C(37) 117.1(5) . . . yes

   C(16) C(15)  C(37) 117.3(5) . . . yes

   N(4) C(16)  C(15) 127.1(5) . . . yes

   N(4) C(16)  C(17) 108.7(5) . . . yes

   C(15) C(16)  C(17) 124.2(5) . . . yes

   C(16) C(17)  C(18) 108.0(5) . . . yes

   C(16) C(17)  H(3) 125.3 . . . no

   C(18) C(17)  H(3) 126.6 . . . no

   C(17) C(18)  C(19) 106.6(5) . . . yes

   C(17) C(18)  H(4) 126.2 . . . no

   C(19) C(18)  H(4) 127.2 . . . no

   N(4) C(19)  C(18) 108.5(5) . . . yes

   N(4) C(19)  C(20) 127.5(5) . . . yes

   C(18) C(19)  C(20) 123.9(5) . . . yes

   C(1) C(20)  C(19) 125.0(6) . . . yes

   C(1) C(20)  C(43) 119.3(6) . . . yes

   C(19) C(20)  C(43) 115.6(5) . . . yes

   C(2) C(21)  H(5) 109.5 . . . no

   C(2) C(21)  H(6) 108.9 . . . no

   C(2) C(21)  H(7) 109.5 . . . no

   H(5) C(21)  H(6) 108.9 . . . no

   H(5) C(21)  H(7) 110.2 . . . no

   H(6) C(21)  H(7) 109.8 . . . no

   C(3) C(22)  H(8) 110.0 . . . no

   C(3) C(22)  H(9) 109.5 . . . no

   C(3) C(22)  H(10) 109.5 . . . no

   H(8) C(22)  H(9) 109.5 . . . no

   H(8) C(22)  H(10) 109.9 . . . no

   H(9) C(22)  H(10) 108.4 . . . no

   C(12) C(23)  H(11) 110.7 . . . no

   C(12) C(23)  H(12) 108.4 . . . no

   C(12) C(23)  H(13) 110.1 . . . no

   H(11) C(23)  H(12) 109.1 . . . no

   H(11) C(23)  H(13) 111.0 . . . no

   H(12) C(23)  H(13) 107.3 . . . no

   C(13) C(24)  H(14) 109.3 . . . no

   C(13) C(24)  H(15) 108.0 . . . no

   C(13) C(24)  H(16) 109.4 . . . no

   H(14) C(24)  H(15) 108.9 . . . no

   H(14) C(24)  H(16) 111.8 . . . no

   H(15) C(24)  H(16) 109.3 . . . no

   C(5) C(25)  C(26) 120.9(6) . . . yes

   C(5) C(25)  C(30) 120.2(6) . . . yes

   C(26) C(25)  C(30) 118.8(6) . . . yes

   C(25) C(26)  C(27) 120.8(6) . . . yes

   C(25) C(26)  H(17) 120.5 . . . no

   C(27) C(26)  H(17) 118.6 . . . no

   C(26) C(27)  C(28) 119.7(6) . . . yes

   C(26) C(27)  H(18) 121.3 . . . no

   C(28) C(27)  H(18) 118.9 . . . no

   C(27) C(28)  C(29) 120.6(6) . . . yes

   C(27) C(28)  H(19) 120.8 . . . no

   C(29) C(28)  H(19) 118.6 . . . no

   C(28) C(29)  C(30) 119.5(7) . . . yes

   C(28) C(29)  H(20) 120.6 . . . no

   C(30) C(29)  H(20) 119.9 . . . no

   C(25) C(30)  C(29) 120.4(6) . . . yes

   C(25) C(30)  H(21) 119.9 . . . no

   C(29) C(30)  H(21) 119.7 . . . no

   C(10) C(31)  C(32) 121.9(6) . . . yes

   C(10) C(31)  C(36) 119.2(6) . . . yes

   C(32) C(31)  C(36) 118.8(6) . . . yes

   C(31) C(32)  C(33) 119.6(6) . . . yes

   C(31) C(32)  H(22) 117.8 . . . no

   C(33) C(32)  H(22) 122.6 . . . no

   C(32) C(33)  C(34) 120.4(6) . . . yes

   C(32) C(33)  H(23) 119.3 . . . no

   C(34) C(33)  H(23) 120.3 . . . no

   C(33) C(34)  C(35) 119.8(7) . . . yes

   C(33) C(34)  H(24) 119.5 . . . no

   C(35) C(34)  H(24) 120.7 . . . no

   C(34) C(35)  C(36) 120.3(7) . . . yes

   C(34) C(35)  H(25) 120.3 . . . no

   C(36) C(35)  H(25) 119.4 . . . no

   C(31) C(36)  C(35) 121.0(6) . . . yes

   C(31) C(36)  H(26) 120.0 . . . no

   C(35) C(36)  H(26) 119.0 . . . no

   C(15) C(37)  C(38) 120.2(6) . . . yes

   C(15) C(37)  C(42) 120.6(6) . . . yes

   C(38) C(37)  C(42) 119.2(5) . . . yes

   C(37) C(38)  C(39) 121.5(6) . . . yes

   C(37) C(38)  H(27) 117.8 . . . no

   C(39) C(38)  H(27) 120.7 . . . no

   C(38) C(39)  C(40) 119.2(6) . . . yes

   C(38) C(39)  H(28) 118.9 . . . no

   C(40) C(39)  H(28) 122.0 . . . no

   C(39) C(40)  C(41) 119.5(6) . . . yes

   C(39) C(40)  H(29) 119.4 . . . no

   C(41) C(40)  H(29) 121.0 . . . no

   C(40) C(41)  C(42) 121.1(6) . . . yes

   C(40) C(41)  H(30) 119.8 . . . no

   C(42) C(41)  H(30) 119.0 . . . no

   C(37) C(42)  C(41) 119.4(6) . . . yes

   C(37) C(42)  H(31) 119.7 . . . no

   C(41) C(42)  H(31) 120.9 . . . no

   C(20) C(43)  C(44) 121.7(6) . . . yes

   C(20) C(43)  C(48) 120.7(5) . . . yes

   C(44) C(43)  C(48) 117.6(6) . . . yes

   C(43) C(44)  C(45) 121.1(6) . . . yes

   C(43) C(44)  H(32) 121.0 . . . no

   C(45) C(44)  H(32) 118.0 . . . no

   C(44) C(45)  C(46) 121.3(7) . . . yes

   C(44) C(45)  H(33) 119.9 . . . no

   C(46) C(45)  H(33) 118.8 . . . no

   C(45) C(46)  C(47) 119.8(6) . . . yes

   C(45) C(46)  H(34) 120.7 . . . no

   C(47) C(46)  H(34) 119.5 . . . no

   C(46) C(47)  C(48) 119.3(6) . . . yes

   C(46) C(47)  H(35) 120.1 . . . no

   C(48) C(47)  H(35) 120.6 . . . no

   C(43) C(48)  C(47) 120.9(6) . . . yes

   C(43) C(48)  H(36) 119.8 . . . no

   C(47) C(48)  H(36) 119.4 . . . no

   O(1) C(50A)  C(51) 105.1(8) . . . yes

   O(1) C(50A)  C(50B) 71(3) . . . yes

   O(1) C(50A)  H(37) 112.3 . . . no

   O(1) C(50A)  H(38) 106.9 . . . no

   C(51) C(50A)  C(50B) 78(3) . . . yes

   C(51) C(50A)  H(37) 114.8 . . . no

   C(51) C(50A)  H(38) 108.7 . . . no

   C(50B) C(50A)  H(37) 66.6 . . . no

   C(50B) C(50A)  H(38) 172.8 . . . no

   H(37) C(50A)  H(38) 108.7 . . . no

   C(50A) C(51)  C(52) 101.9(8) . . . yes

   C(50A) C(51)  C(50B) 26(1) . . . yes

   C(50A) C(51)  H(39) 110.0 . . . no

   C(50A) C(51)  H(40) 111.9 . . . no

   C(52) C(51)  C(50B) 103(1) . . . yes

   C(52) C(51)  H(39) 113.4 . . . no

   C(52) C(51)  H(40) 113.5 . . . no

   C(50B) C(51)  H(39) 86.1 . . . no

   C(50B) C(51)  H(40) 131.2 . . . no

   H(39) C(51)  H(40) 106.2 . . . no

   C(51) C(52)  C(53A) 105(1) . . . yes

   C(51) C(52)  C(53B) 103.6(8) . . . yes

   C(51) C(52)  H(41) 110.1 . . . no

   C(51) C(52)  H(42) 109.2 . . . no

   C(53A) C(52)  C(53B) 29.7(8) . . . yes

   C(53A) C(52)  H(41) 108.2 . . . no

   C(53A) C(52)  H(42) 115.4 . . . no

   C(53B) C(52)  H(41) 81.5 . . . no

   C(53B) C(52)  H(42) 139.1 . . . no

   H(41) C(52)  H(42) 108.3 . . . no

   O(1) C(53A)  C(52) 107(1) . . . yes

   O(1) C(53A)  C(53B) 79(2) . . . yes

   O(1) C(53A)  H(43) 103.9 . . . no

   O(1) C(53A)  H(44) 115.0 . . . no

   C(52) C(53A)  C(53B) 80(2) . . . yes

   C(52) C(53A)  H(43) 108.3 . . . no

   C(52) C(53A)  H(44) 119.8 . . . no

   C(53B) C(53A)  H(43) 169.2 . . . no

   C(53B) C(53A)  H(44) 68.7 . . . no

   H(43) C(53A)  H(44) 100.8 . . . no

   Cl(1) C(55)  Cl(2) 119.8(9) . . . yes

   Cl(1) C(55)  C(56) 101(1) . . . yes

   Cl(1) C(55)  C(58) 72(2) . . . yes

   Cl(2) C(55)  C(56) 35(1) . . . yes

   Cl(2) C(55)  C(58) 62(1) . . . yes

   C(56) C(55)  C(58) 31(1) . . . yes

   Cl(2) C(56)  C(55) 78(2) . . . yes

   Cl(2) C(56)  C(57) 114(2) . . . yes

   Cl(2) C(56)  C(58) 135(4) . . . yes

   C(55) C(56)  C(57) 100(2) . . . yes

   C(55) C(56)  C(58) 71(3) . . . yes

   C(57) C(56)  C(58) 44(3) . . . yes

   Cl(2) C(57)  Cl(3) 141(2) . . . yes

   Cl(2) C(57)  O(2) 108(1) . . . yes

   Cl(2) C(57)  C(56) 26(1) . . . yes

   Cl(2) C(57)  C(58) 53(2) . . . yes

   Cl(3) C(57)  O(2) 101(2) . . . yes

   Cl(3) C(57)  C(56) 144(2) . . . yes

   Cl(3) C(57)  C(58) 151(3) . . . yes

   O(2) C(57)  C(56) 115(2) . . . yes

   O(2) C(57)  C(58) 93(3) . . . yes

   C(56) C(57)  C(58) 33(2) . . . yes

   Cl(1) C(58)  Cl(2) 109(2) . . . yes

   Cl(1) C(58)  Cl(3) 100(2) . . . yes

   Cl(1) C(58)  O(2) 41.6(9) . . . yes

   Cl(1) C(58)  C(55) 57(1) . . . yes

   Cl(1) C(58)  C(56) 131(4) . . . yes

   Cl(1) C(58)  C(57) 93(3) . . . yes

   Cl(2) C(58)  Cl(3) 105(2) . . . yes

   Cl(2) C(58)  O(2) 110(2) . . . yes

   Cl(2) C(58)  C(55) 63(1) . . . yes

   Cl(2) C(58)  C(56) 24(3) . . . yes

   Cl(2) C(58)  C(57) 97(2) . . . yes

   Cl(3) C(58)  O(2) 59(1) . . . yes

   Cl(3) C(58)  C(55) 142(2) . . . yes

   Cl(3) C(58)  C(56) 106(4) . . . yes

   Cl(3) C(58)  C(57) 14(2) . . . yes

   O(2) C(58)  C(55) 90(2) . . . yes

   O(2) C(58)  C(56) 132(4) . . . yes

   O(2) C(58)  C(57) 52(2) . . . yes

   C(55) C(58)  C(56) 78(3) . . . yes

   C(55) C(58)  C(57) 129(3) . . . yes

   C(56) C(58)  C(57) 103(4) . . . yes

   O(1) C(50B)  C(50A) 80(3) . . . yes

   O(1) C(50B)  C(51) 107(2) . . . yes

   O(1) C(50B)  H(37) 118.5 . . . no

   C(50A) C(50B)  C(51) 75(3) . . . yes

   C(50A) C(50B)  H(37) 69.7 . . . no

   C(51) C(50B)  H(37) 114.6 . . . no

   O(1) C(53B)  C(52) 100.6(9) . . . yes

   O(1) C(53B)  C(53A) 70(2) . . . yes

   O(1) C(53B)  H(44) 107.2 . . . no

   C(52) C(53B)  C(53A) 70(2) . . . yes

   C(52) C(53B)  H(44) 111.5 . . . no

   C(53A) C(53B)  H(44) 63.7 . . . no

#------------------------------------------------------------------------------

loop_

_geom_contact_atom_site_label_1

_geom_contact_atom_site_label_2

_geom_contact_distance

_geom_contact_site_symmetry_1

_geom_contact_site_symmetry_2

_geom_contact_publ_flag

   Zn(1)     C(50B)    3.12(3)    . . no

   Zn(1)     C(53B)    3.25(2)    . . no

   Cl(2)     C(39)     3.33(1)    . 4_454 no

   Cl(2)     C(38)     3.444(9)   . 4_454 no

   O(1)      C(50B)    1.36(3)    . . no

   O(1)      C(53B)    1.48(2)    . . no

   O(2)      C(45)     3.38(1)    . 3_656 no

   O(2)      C(21)     3.56(1)    . . no

   O(2)      C(23)     3.58(1)    . 1_554 no

   N(2)      C(53B)    3.45(2)    . . no

   N(3)      C(50B)    3.32(3)    . . no

   N(3)      C(42)     3.593(8)   . 3_657 no

   C(5)      C(33)     3.555(9)   . 3_557 no

   C(6)      C(33)     3.52(1)    . 3_557 no

   C(6)      C(53B)    3.53(2)    . . no

   C(33)     C(40)     3.507(9)   . 1_455 no

   C(33)     C(41)     3.599(9)   . 1_455 no

   C(36)     C(48)     3.592(8)   . 4_455 no

   C(45)     C(45)     3.41(1)    . 3_656 no

   C(50A)    C(50B)    0.69(3)    . . no

   C(50A)    C(53B)    2.41(2)    . . no

   C(51)     C(50B)    1.55(3)    . . no

   C(51)     C(53B)    2.41(2)    . . no

   C(52)     C(53B)    1.54(2)    . . no

   C(52)     C(50B)    2.40(3)    . . no

   C(53A)    C(53B)    0.78(2)    . . no

   C(53A)    C(50B)    2.31(3)    . . no

   C(50B)    C(53B)    2.26(3)    . . no

#------------------------------------------------------------------------------

loop_

_geom_torsion_atom_site_label_1

_geom_torsion_atom_site_label_2

_geom_torsion_atom_site_label_3

_geom_torsion_atom_site_label_4

_geom_torsion_site_symmetry_1

_geom_torsion_site_symmetry_2

_geom_torsion_site_symmetry_3

_geom_torsion_site_symmetry_4

_geom_torsion

_geom_torsion_publ_flag

   Zn(1) O(1) C(50A) C(51) . . . . -169.7(5) no

   Zn(1) O(1) C(50A) C(50B) . . . . -98(3) no

   Zn(1) O(1) C(53A) C(52) . . . . 175.6(6) no

   Zn(1) O(1) C(53A) C(53B) . . . . 100(2) no

   Zn(1) O(1) C(50B) C(50A) . . . . 101(3) no

   Zn(1) O(1) C(50B) C(51) . . . . 172.3(8) no

   Zn(1) O(1) C(53B) C(52) . . . . -166.2(6) no

   Zn(1) O(1) C(53B) C(53A) . . . . -102(2) no

   Zn(1) N(1) C(1) C(2) . . . . 170.6(4) no

   Zn(1) N(1) C(1) C(20) . . . . -11.5(9) no

   Zn(1) N(1) C(4) C(3) . . . . -172.4(4) no

   Zn(1) N(1) C(4) C(5) . . . . 8.7(8) no

   Zn(1) N(2) C(6) C(5) . . . . 24.0(9) no

   Zn(1) N(2) C(6) C(7) . . . . -160.1(4) no

   Zn(1) N(2) C(9) C(8) . . . . 160.3(4) no

   Zn(1) N(2) C(9) C(10) . . . . -19.9(9) no

   Zn(1) N(3) C(11) C(10) . . . . -15.6(8) no

   Zn(1) N(3) C(11) C(12) . . . . 168.4(4) no

   Zn(1) N(3) C(14) C(13) . . . . -169.7(4) no

   Zn(1) N(3) C(14) C(15) . . . . 8.2(8) no

   Zn(1) N(4) C(16) C(15) . . . . 19.3(9) no

   Zn(1) N(4) C(16) C(17) . . . . -163.2(4) no

   Zn(1) N(4) C(19) C(18) . . . . 163.5(4) no

   Zn(1) N(4) C(19) C(20) . . . . -18.9(9) no

   Cl(1) O(2) Cl(3) C(57) . . . . 33(2) no

   Cl(1) O(2) Cl(3) C(58) . . . . 16(1) no

   Cl(1) O(2) C(57) Cl(2) . . . . 51(1) no

   Cl(1) O(2) C(57) Cl(3) . . . . -156(1) no

   Cl(1) O(2) C(57) C(56) . . . . 24(2) no

   Cl(1) O(2) C(57) C(58) . . . . -1(3) no

   Cl(1) O(2) C(58) Cl(2) . . . . 96(2) no

   Cl(1) O(2) C(58) Cl(3) . . . . -168(1) no

   Cl(1) O(2) C(58) C(55) . . . . 35(1) no

   Cl(1) O(2) C(58) C(56) . . . . 109(5) no

   Cl(1) O(2) C(58) C(57) . . . . 179(3) no

   Cl(1) C(55) Cl(2) C(56) . . . . 63(2) no

   Cl(1) C(55) Cl(2) C(57) . . . . 22(1) no

   Cl(1) C(55) Cl(2) C(58) . . . . 45(2) no

   Cl(1) C(55) C(56) Cl(2) . . . . -128(2) no

   Cl(1) C(55) C(56) C(57) . . . . -15(2) no

   Cl(1) C(55) C(56) C(58) . . . . 19(3) no

   Cl(1) C(55) C(58) Cl(2) . . . . -140(1) no

   Cl(1) C(55) C(58) Cl(3) . . . . -60(3) no

   Cl(1) C(55) C(58) O(2) . . . . -27.0(9) no

   Cl(1) C(55) C(58) C(56) . . . . -161(3) no

   Cl(1) C(55) C(58) C(57) . . . . -64(4) no

   Cl(1) C(58) Cl(2) C(55) . . . . -35(1) no

   Cl(1) C(58) Cl(2) C(56) . . . . -158(7) no

   Cl(1) C(58) Cl(2) C(57) . . . . 96(3) no

   Cl(1) C(58) Cl(3) O(2) . . . . -8.3(7) no

   Cl(1) C(58) Cl(3) C(57) . . . . -61(6) no

   Cl(1) C(58) O(2) Cl(3) . . . . 168(1) no

   Cl(1) C(58) O(2) C(57) . . . . -179(3) no

   Cl(1) C(58) C(55) Cl(2) . . . . 140(1) no

   Cl(1) C(58) C(55) C(56) . . . . 161(3) no

   Cl(1) C(58) C(56) Cl(2) . . . . 28(9) no

   Cl(1) C(58) C(56) C(55) . . . . -22(4) no

   Cl(1) C(58) C(56) C(57) . . . . 106(5) no

   Cl(1) C(58) C(57) Cl(2) . . . . -110(2) no

   Cl(1) C(58) C(57) Cl(3) . . . . 120(6) no

   Cl(1) C(58) C(57) O(2) . . . . 1(2) no

   Cl(1) C(58) C(57) C(56) . . . . -134(4) no

   Cl(2) C(55) Cl(1) O(2) . . . . 0(1) no

   Cl(2) C(55) Cl(1) C(58) . . . . -41(1) no

   Cl(2) C(55) C(56) C(57) . . . . 113(2) no

   Cl(2) C(55) C(56) C(58) . . . . 147(4) no

   Cl(2) C(55) C(58) Cl(3) . . . . 80(3) no

   Cl(2) C(55) C(58) O(2) . . . . 113(1) no

   Cl(2) C(55) C(58) C(56) . . . . -21(3) no

   Cl(2) C(55) C(58) C(57) . . . . 76(4) no

   Cl(2) C(56) C(55) C(58) . . . . -147(4) no

   Cl(2) C(56) C(57) Cl(3) . . . . -101(4) no

   Cl(2) C(56) C(57) O(2) . . . . 80(3) no

   Cl(2) C(56) C(57) C(58) . . . . 131(5) no

   Cl(2) C(56) C(58) Cl(3) . . . . -91(6) no

   Cl(2) C(56) C(58) O(2) . . . . -29(9) no

   Cl(2) C(56) C(58) C(55) . . . . 50(5) no

   Cl(2) C(56) C(58) C(57) . . . . -78(6) no

   Cl(2) C(57) Cl(3) O(2) . . . . 138(3) no

   Cl(2) C(57) Cl(3) C(58) . . . . -105(7) no

   Cl(2) C(57) O(2) Cl(3) . . . . -154(2) no

   Cl(2) C(57) O(2) C(58) . . . . 52(2) no

   Cl(2) C(57) C(56) C(55) . . . . -82(2) no

   Cl(2) C(57) C(56) C(58) . . . . -131(5) no

   Cl(2) C(57) C(58) Cl(3) . . . . 130(6) no

   Cl(2) C(57) C(58) O(2) . . . . -111(2) no

   Cl(2) C(57) C(58) C(55) . . . . -61(3) no

   Cl(2) C(57) C(58) C(56) . . . . 24(3) no

   Cl(2) C(58) Cl(1) O(2) . . . . -99(2) no

   Cl(2) C(58) Cl(1) C(55) . . . . 38(1) no

   Cl(2) C(58) Cl(3) O(2) . . . . 105(2) no

   Cl(2) C(58) Cl(3) C(57) . . . . 52(6) no

   Cl(2) C(58) O(2) Cl(3) . . . . -96(2) no

   Cl(2) C(58) O(2) C(57) . . . . -82(2) no

   Cl(2) C(58) C(55) C(56) . . . . 21(3) no

   Cl(2) C(58) C(56) C(55) . . . . -50(5) no

   Cl(2) C(58) C(56) C(57) . . . . 78(6) no

   Cl(2) C(58) C(57) Cl(3) . . . . -130(6) no

   Cl(2) C(58) C(57) O(2) . . . . 111(2) no

   Cl(2) C(58) C(57) C(56) . . . . -24(3) no

   Cl(3) O(2) Cl(1) C(55) . . . . -49(1) no

   Cl(3) O(2) Cl(1) C(58) . . . . -15(1) no

   Cl(3) O(2) C(57) C(56) . . . . 180(3) no

   Cl(3) O(2) C(57) C(58) . . . . 154(3) no

   Cl(3) O(2) C(58) C(55) . . . . -157(2) no

   Cl(3) O(2) C(58) C(56) . . . . -84(5) no

   Cl(3) O(2) C(58) C(57) . . . . -14(2) no

   Cl(3) C(57) Cl(2) C(55) . . . . -177(3) no

   Cl(3) C(57) Cl(2) C(56) . . . . 113(4) no

   Cl(3) C(57) Cl(2) C(58) . . . . 144(4) no

   Cl(3) C(57) O(2) C(58) . . . . -154(3) no

   Cl(3) C(57) C(56) C(55) . . . . 178(3) no

   Cl(3) C(57) C(56) C(58) . . . . 128(6) no

   Cl(3) C(57) C(58) O(2) . . . . 119(7) no

   Cl(3) C(57) C(58) C(55) . . . . 169(4) no

   Cl(3) C(57) C(58) C(56) . . . . -106(7) no

   Cl(3) C(58) Cl(1) O(2) . . . . 10.8(9) no

   Cl(3) C(58) Cl(1) C(55) . . . . 148(2) no

   Cl(3) C(58) Cl(2) C(55) . . . . -141(2) no

   Cl(3) C(58) Cl(2) C(56) . . . . 96(6) no

   Cl(3) C(58) Cl(2) C(57) . . . . -11(1) no

   Cl(3) C(58) O(2) C(57) . . . . 14(2) no

   Cl(3) C(58) C(55) C(56) . . . . 101(5) no

   Cl(3) C(58) C(56) C(55) . . . . -141(2) no

   Cl(3) C(58) C(56) C(57) . . . . -14(2) no

   Cl(3) C(58) C(57) O(2) . . . . -119(7) no

   Cl(3) C(58) C(57) C(56) . . . . 106(7) no

   O(1) Zn(1) N(1) C(1) . . . . 97.1(5) no

   O(1) Zn(1) N(1) C(4) . . . . -88.8(5) no

   O(1) Zn(1) N(2) C(6) . . . . 74.7(5) no

   O(1) Zn(1) N(2) C(9) . . . . -83.8(5) no

   O(1) Zn(1) N(3) C(11) . . . . 99.0(5) no

   O(1) Zn(1) N(3) C(14) . . . . -89.3(5) no

   O(1) Zn(1) N(4) C(16) . . . . 77.8(5) no

   O(1) Zn(1) N(4) C(19) . . . . -83.9(5) no

   O(1) C(50A) C(51) C(52) . . . . -29.2(9) no

   O(1) C(50A) C(51) C(50B) . . . . 67(3) no

   O(1) C(50A) C(50B) C(51) . . . . -111(1) no

   O(1) C(53A) C(52) C(51) . . . . 15(1) no

   O(1) C(53A) C(52) C(53B) . . . . -75(2) no

   O(1) C(53A) C(53B) C(52) . . . . 110.0(9) no

   O(1) C(50B) C(50A) C(51) . . . . 111(1) no

   O(1) C(50B) C(51) C(50A) . . . . -74(3) no

   O(1) C(50B) C(51) C(52) . . . . 16(2) no

   O(1) C(53B) C(52) C(51) . . . . -34(1) no

   O(1) C(53B) C(52) C(53A) . . . . 64(2) no

   O(1) C(53B) C(53A) C(52) . . . . -110.0(9) no

   O(2) Cl(1) C(55) C(56) . . . . 31(1) no

   O(2) Cl(1) C(55) C(58) . . . . 41(1) no

   O(2) Cl(1) C(58) C(55) . . . . -137(1) no

   O(2) Cl(1) C(58) C(56) . . . . -111(5) no

   O(2) Cl(1) C(58) C(57) . . . . -1(2) no

   O(2) Cl(3) C(57) C(56) . . . . -180(5) no

   O(2) Cl(3) C(57) C(58) . . . . -117(7) no

   O(2) Cl(3) C(58) C(55) . . . . 39(3) no

   O(2) Cl(3) C(58) C(56) . . . . 130(4) no

   O(2) Cl(3) C(58) C(57) . . . . 53(6) no

   O(2) C(57) Cl(2) C(55) . . . . -40(1) no

   O(2) C(57) Cl(2) C(56) . . . . -110(3) no

   O(2) C(57) Cl(2) C(58) . . . . -80(3) no

   O(2) C(57) Cl(3) C(58) . . . . 117(7) no

   O(2) C(57) C(56) C(55) . . . . -2(2) no

   O(2) C(57) C(56) C(58) . . . . -52(4) no

   O(2) C(57) C(58) C(55) . . . . 50(4) no

   O(2) C(57) C(58) C(56) . . . . 135(4) no

   O(2) C(58) Cl(1) C(55) . . . . 137(1) no

   O(2) C(58) Cl(2) C(55) . . . . -79(2) no

   O(2) C(58) Cl(2) C(56) . . . . 158(7) no

   O(2) C(58) Cl(2) C(57) . . . . 51(2) no

   O(2) C(58) Cl(3) C(57) . . . . -53(6) no

   O(2) C(58) C(55) C(56) . . . . 134(4) no

   O(2) C(58) C(56) C(55) . . . . -79(4) no

   O(2) C(58) C(56) C(57) . . . . 49(3) no

   O(2) C(58) C(57) C(56) . . . . -135(4) no

   N(1) Zn(1) O(1) C(50A) . . . . -129.4(7) no

   N(1) Zn(1) O(1) C(53A) . . . . 15(1) no

   N(1) Zn(1) O(1) C(50B) . . . . -164(1) no

   N(1) Zn(1) O(1) C(53B) . . . . 53.0(9) no

   N(1) Zn(1) N(2) C(6) . . . . -22.1(5) no

   N(1) Zn(1) N(2) C(9) . . . . 179.4(5) no

   N(1) Zn(1) N(3) C(11) . . . . -81(1) no

   N(1) Zn(1) N(3) C(14) . . . . 91.1(9) no

   N(1) Zn(1) N(4) C(16) . . . . 174.6(5) no

   N(1) Zn(1) N(4) C(19) . . . . 13.0(5) no

   N(1) C(1) C(2) C(3) . . . . 4.7(7) no

   N(1) C(1) C(2) C(21) . . . . -172.5(6) no

   N(1) C(1) C(20) C(19) . . . . 10(1) no

   N(1) C(1) C(20) C(43) . . . . -166.9(5) no

   N(1) C(4) C(3) C(2) . . . . 0.1(7) no

   N(1) C(4) C(3) C(22) . . . . 174.4(6) no

   N(1) C(4) C(5) C(6) . . . . -15(1) no

   N(1) C(4) C(5) C(25) . . . . 164.1(5) no

   N(2) Zn(1) O(1) C(50A) . . . . 140.9(7) no

   N(2) Zn(1) O(1) C(53A) . . . . -74(1) no

   N(2) Zn(1) O(1) C(50B) . . . . 106(1) no

   N(2) Zn(1) O(1) C(53B) . . . . -36.7(9) no

   N(2) Zn(1) N(1) C(1) . . . . -167.1(5) no

   N(2) Zn(1) N(1) C(4) . . . . 6.9(5) no

   N(2) Zn(1) N(3) C(11) . . . . 3.2(5) no

   N(2) Zn(1) N(3) C(14) . . . . 174.9(5) no

   N(2) Zn(1) N(4) C(16) . . . . -103(1) no

   N(2) Zn(1) N(4) C(19) . . . . 96(1) no

   N(2) C(6) C(5) C(4) . . . . -2(1) no

   N(2) C(6) C(5) C(25) . . . . 178.7(6) no

   N(2) C(6) C(7) C(8) . . . . -1.6(8) no

   N(2) C(9) C(8) C(7) . . . . 0.3(8) no

   N(2) C(9) C(10) C(11) . . . . 6(1) no

   N(2) C(9) C(10) C(31) . . . . -177.4(6) no

   N(3) Zn(1) O(1) C(50A) . . . . 50.7(7) no

   N(3) Zn(1) O(1) C(53A) . . . . -165(1) no

   N(3) Zn(1) O(1) C(50B) . . . . 16(2) no

   N(3) Zn(1) O(1) C(53B) . . . . -126.9(9) no

   N(3) Zn(1) N(1) C(1) . . . . -83(1) no

   N(3) Zn(1) N(1) C(4) . . . . 91(1) no

   N(3) Zn(1) N(2) C(6) . . . . 171.9(5) no

   N(3) Zn(1) N(2) C(9) . . . . 13.4(5) no

   N(3) Zn(1) N(4) C(16) . . . . -19.4(5) no

   N(3) Zn(1) N(4) C(19) . . . . 179.0(5) no

   N(3) C(11) C(10) C(9) . . . . 13(1) no

   N(3) C(11) C(10) C(31) . . . . -163.6(5) no

   N(3) C(11) C(12) C(13) . . . . 4.4(7) no

   N(3) C(11) C(12) C(23) . . . . -167.6(6) no

   N(3) C(14) C(13) C(12) . . . . -0.6(7) no

   N(3) C(14) C(13) C(24) . . . . 174.7(6) no

   N(3) C(14) C(15) C(16) . . . . -16(1) no

   N(3) C(14) C(15) C(37) . . . . 164.2(5) no

   N(4) Zn(1) O(1) C(50A) . . . . -39.2(7) no

   N(4) Zn(1) O(1) C(53A) . . . . 105(1) no

   N(4) Zn(1) O(1) C(50B) . . . . -74(2) no

   N(4) Zn(1) O(1) C(53B) . . . . 143.2(9) no

   N(4) Zn(1) N(1) C(1) . . . . 1.0(5) no

   N(4) Zn(1) N(1) C(4) . . . . 175.1(5) no

   N(4) Zn(1) N(2) C(6) . . . . -105(1) no

   N(4) Zn(1) N(2) C(9) . . . . 97(1) no

   N(4) Zn(1) N(3) C(11) . . . . -164.9(5) no

   N(4) Zn(1) N(3) C(14) . . . . 6.8(5) no

   N(4) C(16) C(15) C(14) . . . . 2(1) no

   N(4) C(16) C(15) C(37) . . . . -178.6(6) no

   N(4) C(16) C(17) C(18) . . . . -0.9(8) no

   N(4) C(19) C(18) C(17) . . . . 0.1(8) no

   N(4) C(19) C(20) C(1) . . . . 6(1) no

   N(4) C(19) C(20) C(43) . . . . -176.7(6) no

   C(1) N(1) C(4) C(3) . . . . 2.7(7) no

   C(1) N(1) C(4) C(5) . . . . -176.1(6) no

   C(1) C(2) C(3) C(4) . . . . -2.7(7) no

   C(1) C(2) C(3) C(22) . . . . -177.4(6) no

   C(1) C(20) C(19) C(18) . . . . -176.3(6) no

   C(1) C(20) C(43) C(44) . . . . -110.7(7) no

   C(1) C(20) C(43) C(48) . . . . 70.5(8) no

   C(2) C(1) N(1) C(4) . . . . -4.6(7) no

   C(2) C(1) C(20) C(19) . . . . -172.4(6) no

   C(2) C(1) C(20) C(43) . . . . 10.7(9) no

   C(2) C(3) C(4) C(5) . . . . 178.9(6) no

   C(3) C(2) C(1) C(20) . . . . -173.2(6) no

   C(3) C(4) C(5) C(6) . . . . 166.2(6) no

   C(3) C(4) C(5) C(25) . . . . -15(1) no

   C(4) N(1) C(1) C(20) . . . . 173.4(6) no

   C(4) C(3) C(2) C(21) . . . . 174.7(6) no

   C(4) C(5) C(6) C(7) . . . . -177.4(6) no

   C(4) C(5) C(25) C(26) . . . . -76.2(8) no

   C(4) C(5) C(25) C(30) . . . . 104.7(8) no

   C(5) C(4) C(3) C(22) . . . . -7(1) no

   C(5) C(6) N(2) C(9) . . . . -174.1(6) no

   C(5) C(6) C(7) C(8) . . . . 174.3(7) no

   C(5) C(25) C(26) C(27) . . . . 177.7(6) no

   C(5) C(25) C(30) C(29) . . . . -178.5(7) no

   C(6) N(2) C(9) C(8) . . . . -1.4(7) no

   C(6) N(2) C(9) C(10) . . . . 178.5(6) no

   C(6) C(5) C(25) C(26) . . . . 103.1(8) no

   C(6) C(5) C(25) C(30) . . . . -76.0(9) no

   C(6) C(7) C(8) C(9) . . . . 0.8(8) no

   C(7) C(6) N(2) C(9) . . . . 1.8(7) no

   C(7) C(6) C(5) C(25) . . . . 3(1) no

   C(7) C(8) C(9) C(10) . . . . -179.5(6) no

   C(8) C(9) C(10) C(11) . . . . -174.4(6) no

   C(8) C(9) C(10) C(31) . . . . 2.3(9) no

   C(9) C(10) C(11) C(12) . . . . -171.6(6) no

   C(9) C(10) C(31) C(32) . . . . 70.3(8) no

   C(9) C(10) C(31) C(36) . . . . -108.3(7) no

   C(10) C(11) N(3) C(14) . . . . 171.3(6) no

   C(10) C(11) C(12) C(13) . . . . -171.4(6) no

   C(10) C(11) C(12) C(23) . . . . 17(1) no

   C(10) C(31) C(32) C(33) . . . . 178.3(6) no

   C(10) C(31) C(36) C(35) . . . . -179.0(6) no

   C(11) N(3) C(14) C(13) . . . . 3.3(6) no

   C(11) N(3) C(14) C(15) . . . . -178.8(6) no

   C(11) C(10) C(31) C(32) . . . . -112.7(7) no

   C(11) C(10) C(31) C(36) . . . . 68.8(8) no

   C(11) C(12) C(13) C(14) . . . . -2.2(7) no

   C(11) C(12) C(13) C(24) . . . . -177.7(6) no

   C(12) C(11) N(3) C(14) . . . . -4.7(6) no

   C(12) C(11) C(10) C(31) . . . . 11.7(9) no

   C(12) C(13) C(14) C(15) . . . . -178.4(6) no

   C(13) C(14) C(15) C(16) . . . . 161.5(6) no

   C(13) C(14) C(15) C(37) . . . . -18.2(9) no

   C(14) C(13) C(12) C(23) . . . . 170.0(6) no

   C(14) C(15) C(16) C(17) . . . . -175.5(6) no

   C(14) C(15) C(37) C(38) . . . . -72.7(8) no

   C(14) C(15) C(37) C(42) . . . . 109.6(7) no

   C(15) C(14) C(13) C(24) . . . . -3(1) no

   C(15) C(16) N(4) C(19) . . . . -176.5(6) no

   C(15) C(16) C(17) C(18) . . . . 176.7(7) no

   C(15) C(37) C(38) C(39) . . . . -179.4(6) no

   C(15) C(37) C(42) C(41) . . . . -179.4(6) no

   C(16) N(4) C(19) C(18) . . . . -0.7(7) no

   C(16) N(4) C(19) C(20) . . . . 177.0(6) no

   C(16) C(15) C(37) C(38) . . . . 107.6(7) no

   C(16) C(15) C(37) C(42) . . . . -70.1(8) no

   C(16) C(17) C(18) C(19) . . . . 0.5(8) no

   C(17) C(16) N(4) C(19) . . . . 1.0(7) no

   C(17) C(16) C(15) C(37) . . . . 4(1) no

   C(17) C(18) C(19) C(20) . . . . -177.6(6) no

   C(18) C(19) C(20) C(43) . . . . 0.6(9) no

   C(19) C(20) C(43) C(44) . . . . 72.2(8) no

   C(19) C(20) C(43) C(48) . . . . -106.6(7) no

   C(20) C(1) C(2) C(21) . . . . 10(1) no

   C(20) C(43) C(44) C(45) . . . . 177.8(6) no

   C(20) C(43) C(48) C(47) . . . . -178.8(6) no

   C(21) C(2) C(3) C(22) . . . . 0(1) no

   C(23) C(12) C(13) C(24) . . . . -6(1) no

   C(25) C(26) C(27) C(28) . . . . 2(1) no

   C(25) C(30) C(29) C(28) . . . . 0(1) no

   C(26) C(25) C(30) C(29) . . . . 2(1) no

   C(26) C(27) C(28) C(29) . . . . 0(1) no

   C(27) C(26) C(25) C(30) . . . . -3(1) no

   C(27) C(28) C(29) C(30) . . . . -1(1) no

   C(31) C(32) C(33) C(34) . . . . 1(1) no

   C(31) C(36) C(35) C(34) . . . . 1(1) no

   C(32) C(31) C(36) C(35) . . . . 2(1) no

   C(32) C(33) C(34) C(35) . . . . 3(1) no

   C(33) C(32) C(31) C(36) . . . . -3.1(9) no

   C(33) C(34) C(35) C(36) . . . . -3(1) no

   C(37) C(38) C(39) C(40) . . . . 0(1) no

   C(37) C(42) C(41) C(40) . . . . -2(1) no

   C(38) C(37) C(42) C(41) . . . . 3(1) no

   C(38) C(39) C(40) C(41) . . . . 1(1) no

   C(39) C(38) C(37) C(42) . . . . -2(1) no

   C(39) C(40) C(41) C(42) . . . . 1(1) no

   C(43) C(44) C(45) C(46) . . . . 3(1) no

   C(43) C(48) C(47) C(46) . . . . -1(1) no

   C(44) C(43) C(48) C(47) . . . . 2.3(9) no

   C(44) C(45) C(46) C(47) . . . . -2(1) no

   C(45) C(44) C(43) C(48) . . . . -3.4(9) no

   C(45) C(46) C(47) C(48) . . . . 1(1) no

   C(50A) O(1) C(53A) C(52) . . . . -35(1) no

   C(50A) O(1) C(53A) C(53B) . . . . -110(2) no

   C(50A) O(1) C(50B) C(51) . . . . 71(3) no

   C(50A) O(1) C(53B) C(52) . . . . 16(1) no

   C(50A) O(1) C(53B) C(53A) . . . . 80(2) no

   C(50A) C(51) C(52) C(53A) . . . . 8(1) no

   C(50A) C(51) C(52) C(53B) . . . . 39.1(9) no

   C(50A) C(50B) O(1) C(53A) . . . . -78(3) no

   C(50A) C(50B) O(1) C(53B) . . . . -110(3) no

   C(50A) C(50B) C(51) C(52) . . . . 90(3) no

   C(51) C(50A) O(1) C(53A) . . . . 40(1) no

   C(51) C(50A) O(1) C(50B) . . . . -72(3) no

   C(51) C(50A) O(1) C(53B) . . . . 8(1) no

   C(51) C(52) C(53A) C(53B) . . . . 91(2) no

   C(51) C(52) C(53B) C(53A) . . . . -97(2) no

   C(51) C(50B) O(1) C(53A) . . . . -7(2) no

   C(51) C(50B) O(1) C(53B) . . . . -39(2) no

   C(52) C(51) C(50A) C(50B) . . . . -96(3) no

   C(52) C(53A) O(1) C(50B) . . . . -5(2) no

   C(52) C(53A) O(1) C(53B) . . . . 76(2) no

   C(52) C(53B) O(1) C(53A) . . . . -64(2) no

   C(52) C(53B) O(1) C(50B) . . . . 46(2) no

   C(53A) O(1) C(50A) C(50B) . . . . 112(3) no

   C(53A) C(52) C(51) C(50B) . . . . -18(1) no

   C(53A) C(53B) O(1) C(50B) . . . . 110(2) no

   C(55) Cl(1) O(2) C(57) . . . . -33(1) no

   C(55) Cl(1) O(2) C(58) . . . . -34(1) no

   C(55) Cl(1) C(58) C(56) . . . . 26(5) no

   C(55) Cl(1) C(58) C(57) . . . . 136(3) no

   C(55) Cl(2) C(56) C(57) . . . . -96(2) no

   C(55) Cl(2) C(56) C(58) . . . . -48(6) no

   C(55) Cl(2) C(57) C(56) . . . . 70(2) no

   C(55) Cl(2) C(57) C(58) . . . . 39(3) no

   C(55) Cl(2) C(58) C(56) . . . . 123(6) no

   C(55) Cl(2) C(58) C(57) . . . . -131(3) no

   C(55) C(56) Cl(2) C(57) . . . . 96(2) no

   C(55) C(56) Cl(2) C(58) . . . . 48(6) no

   C(55) C(56) C(57) C(58) . . . . 50(4) no

   C(55) C(56) C(58) C(57) . . . . -128(3) no

   C(55) C(58) Cl(2) C(56) . . . . -123(6) no

   C(55) C(58) Cl(2) C(57) . . . . 131(3) no

   C(55) C(58) Cl(3) C(57) . . . . -14(5) no

   C(55) C(58) O(2) C(57) . . . . -144(3) no

   C(55) C(58) C(56) C(57) . . . . 128(3) no

   C(55) C(58) C(57) C(56) . . . . -85(5) no

   C(56) Cl(2) C(55) C(58) . . . . 18(2) no

   C(56) Cl(2) C(57) C(58) . . . . -31(3) no

   C(56) Cl(2) C(58) C(57) . . . . 106(7) no

   C(56) C(55) Cl(1) C(58) . . . . -10(2) no

   C(56) C(55) Cl(2) C(57) . . . . -41(2) no

   C(56) C(55) Cl(2) C(58) . . . . -18(2) no

   C(56) C(55) C(58) C(57) . . . . 97(5) no

   C(56) C(57) Cl(2) C(58) . . . . 31(3) no

   C(56) C(57) Cl(3) C(58) . . . . -62(6) no

   C(56) C(57) O(2) C(58) . . . . 25(2) no

   C(56) C(58) Cl(2) C(57) . . . . -106(7) no

   C(56) C(58) Cl(3) C(57) . . . . 77(7) no

   C(56) C(58) O(2) C(57) . . . . -70(5) no

   C(57) Cl(2) C(55) C(58) . . . . -23(2) no

   C(57) Cl(2) C(56) C(58) . . . . 48(5) no

   C(57) Cl(3) O(2) C(58) . . . . 16(2) no

   C(57) O(2) Cl(1) C(58) . . . . 1(2) no

   C(57) O(2) Cl(3) C(58) . . . . -16(2) no

   C(57) C(56) Cl(2) C(58) . . . . -48(5) no

   C(57) C(56) C(55) C(58) . . . . -34(3) no

   C(50B) O(1) C(53A) C(53B) . . . . -81(2) no

   C(50B) C(50A) O(1) C(53B) . . . . 80(3) no

   C(50B) C(51) C(52) C(53B) . . . . 12(1) no

#===END
